# Supplementary material for: miR2118-triggered phased siRNAs are differentially expressed during the panicle development of wild and domesticated African rice species
Source: PubMed Central journal article supplement (PMC4788661; doi:10.1186/s12284-016-0082-9), 2016-03-12

**Additional file 5. Relative abundance of small RNAs between *O. barthii* and *O. glaberrima*.**

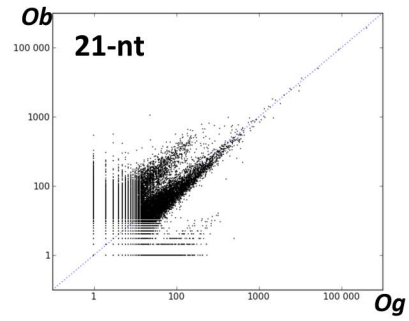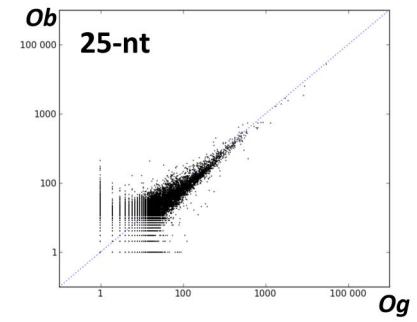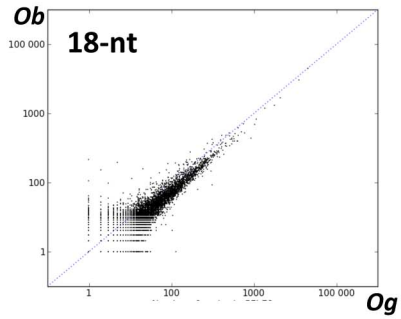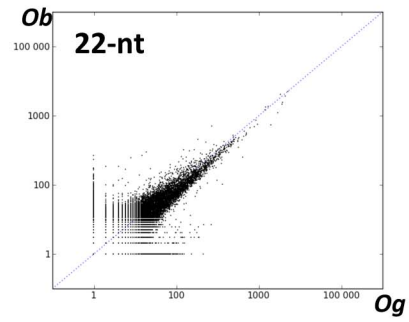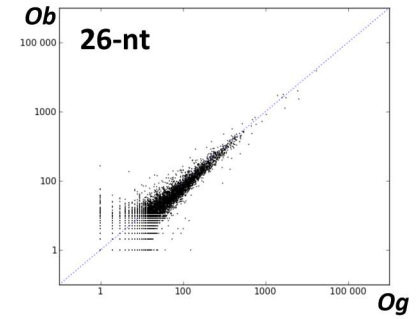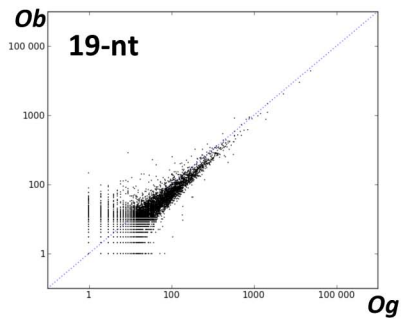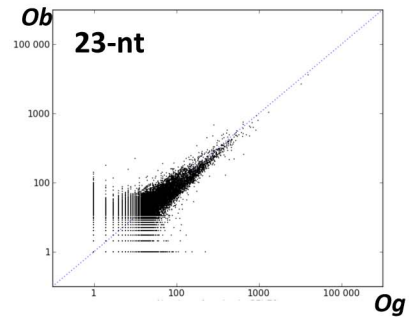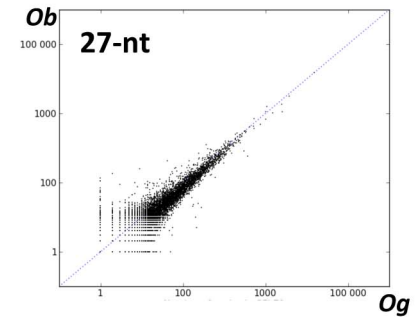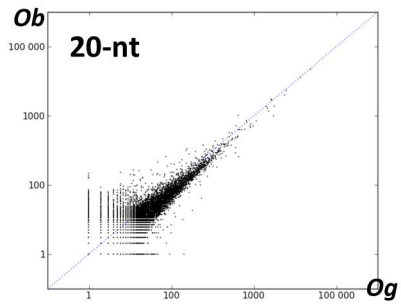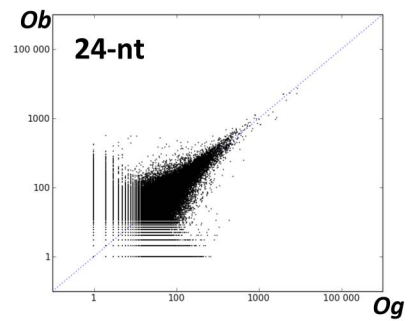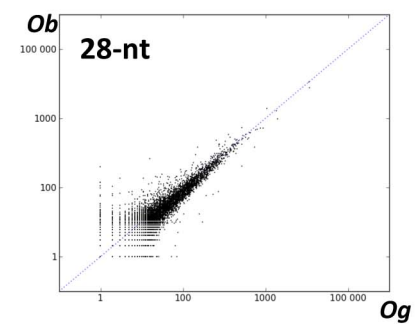

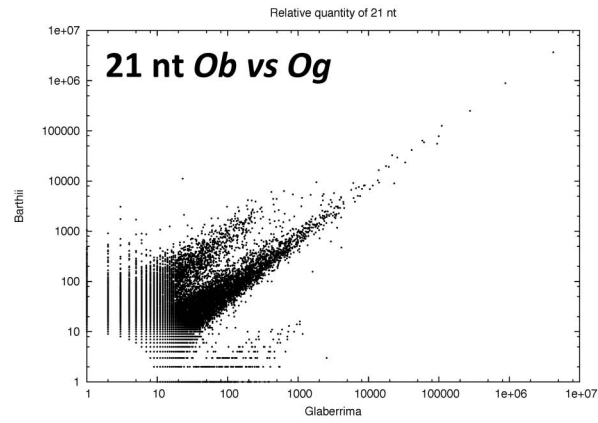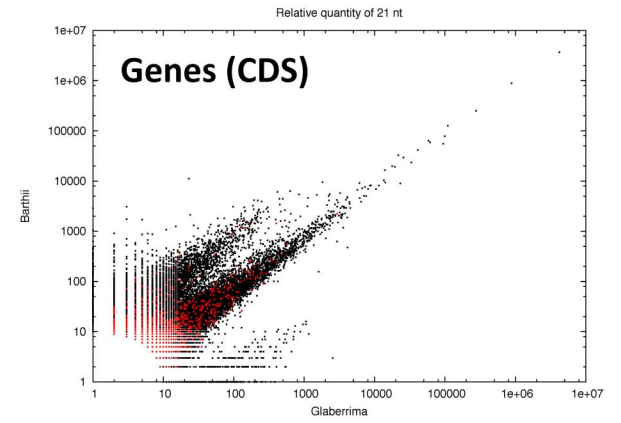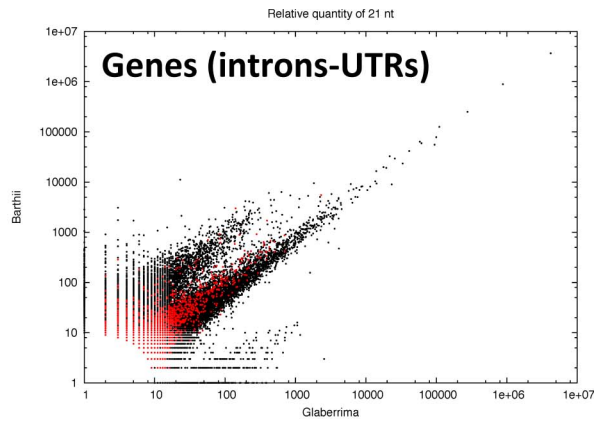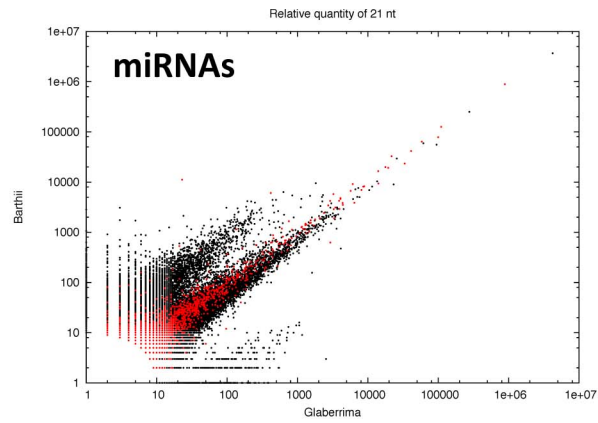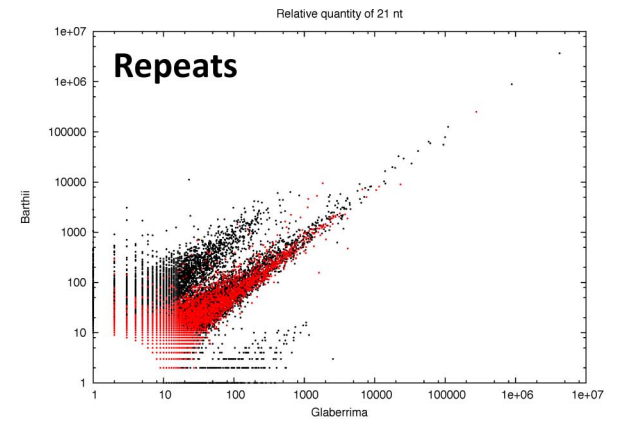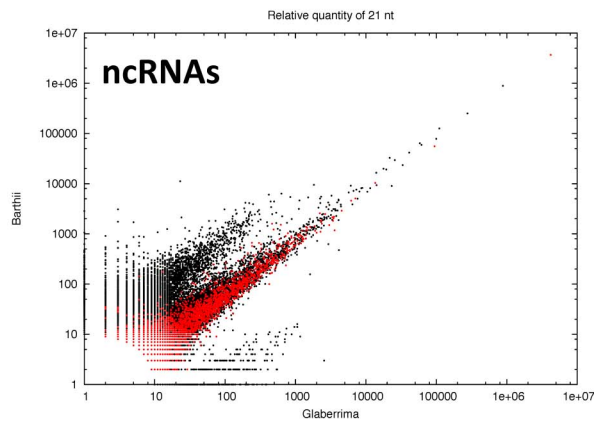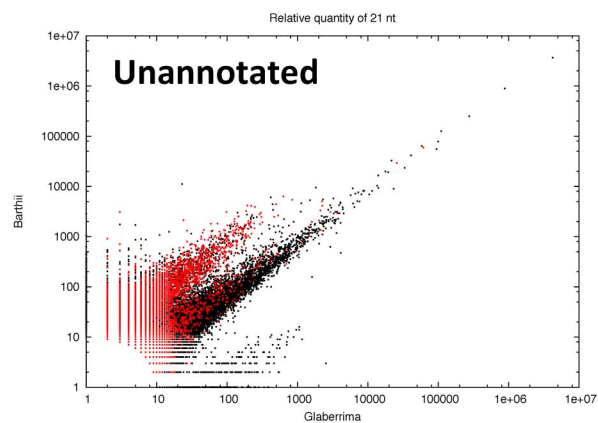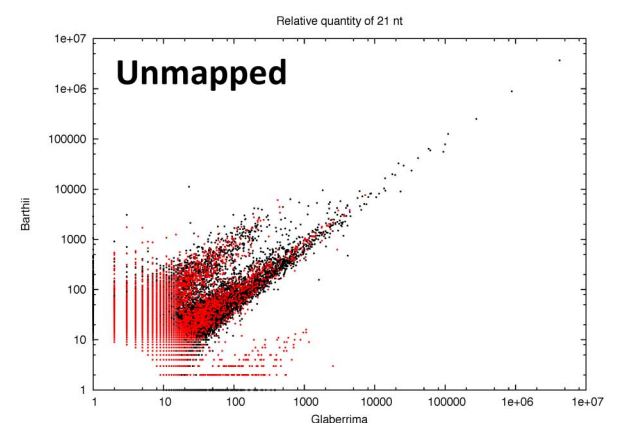

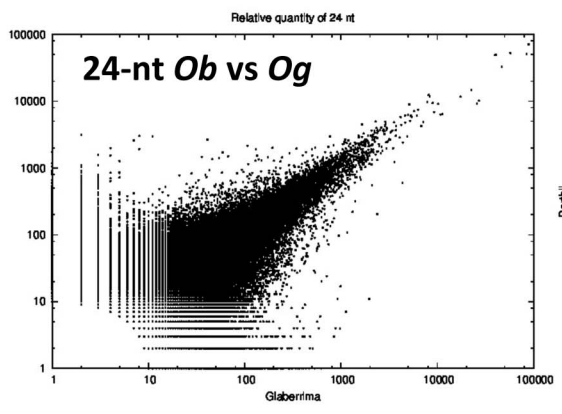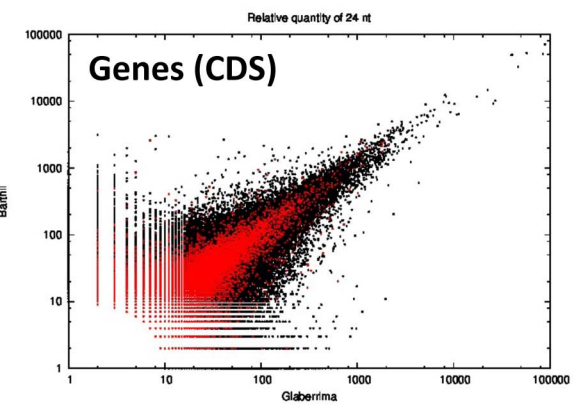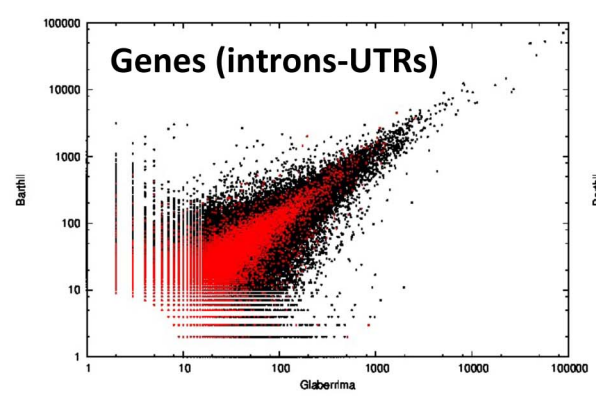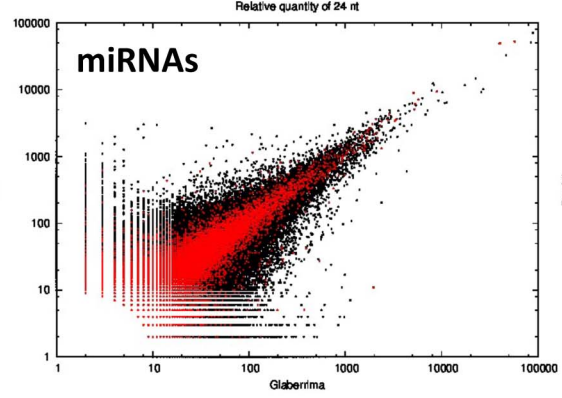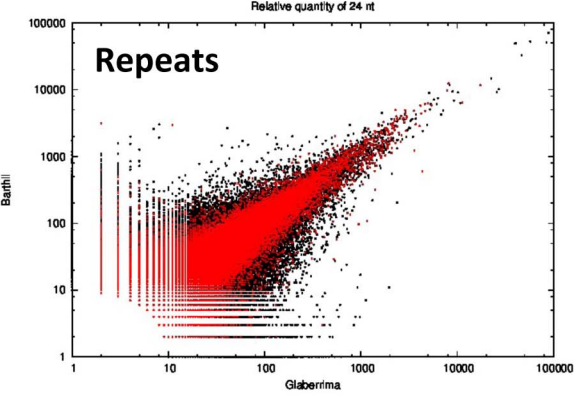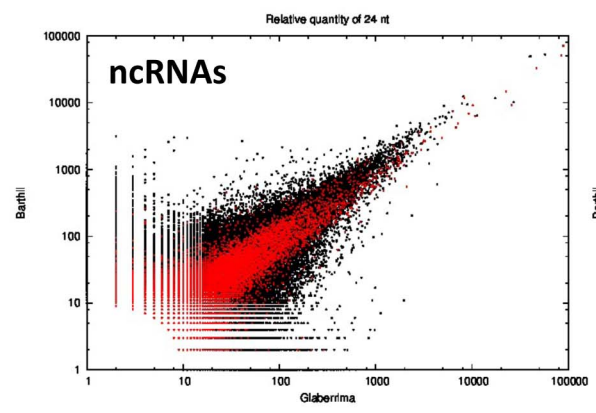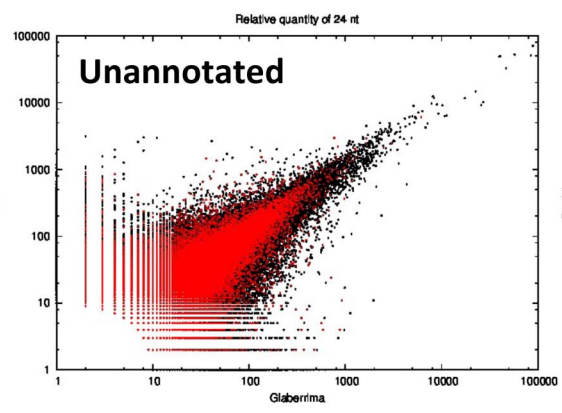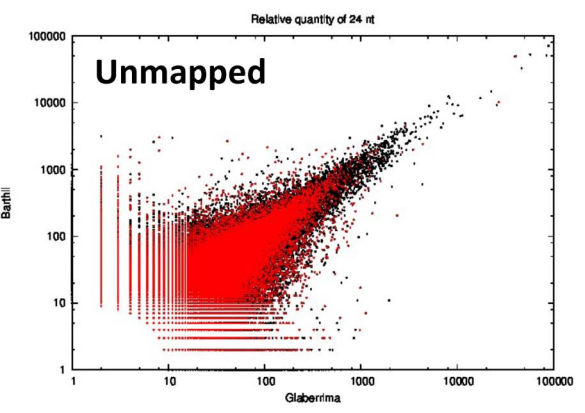

Supplement: 12284_2016_82_MOESM5_ESM.pdf [file 12284_2016_82_MOESM5_ESM.pdf]
