# Supplementary material for: miR2118-triggered phased siRNAs are differentially expressed during the panicle development of wild and domesticated African rice species
Source: PubMed Central journal article supplement (PMC4788661; doi:10.1186/s12284-016-0082-9), 2016-03-12

Additional file 3. Size distribution, mapping and annotation of *O. barthii* and *O. glaberrima* panicle-derived small RNAs on *O. sativa* Nipponbare genome.

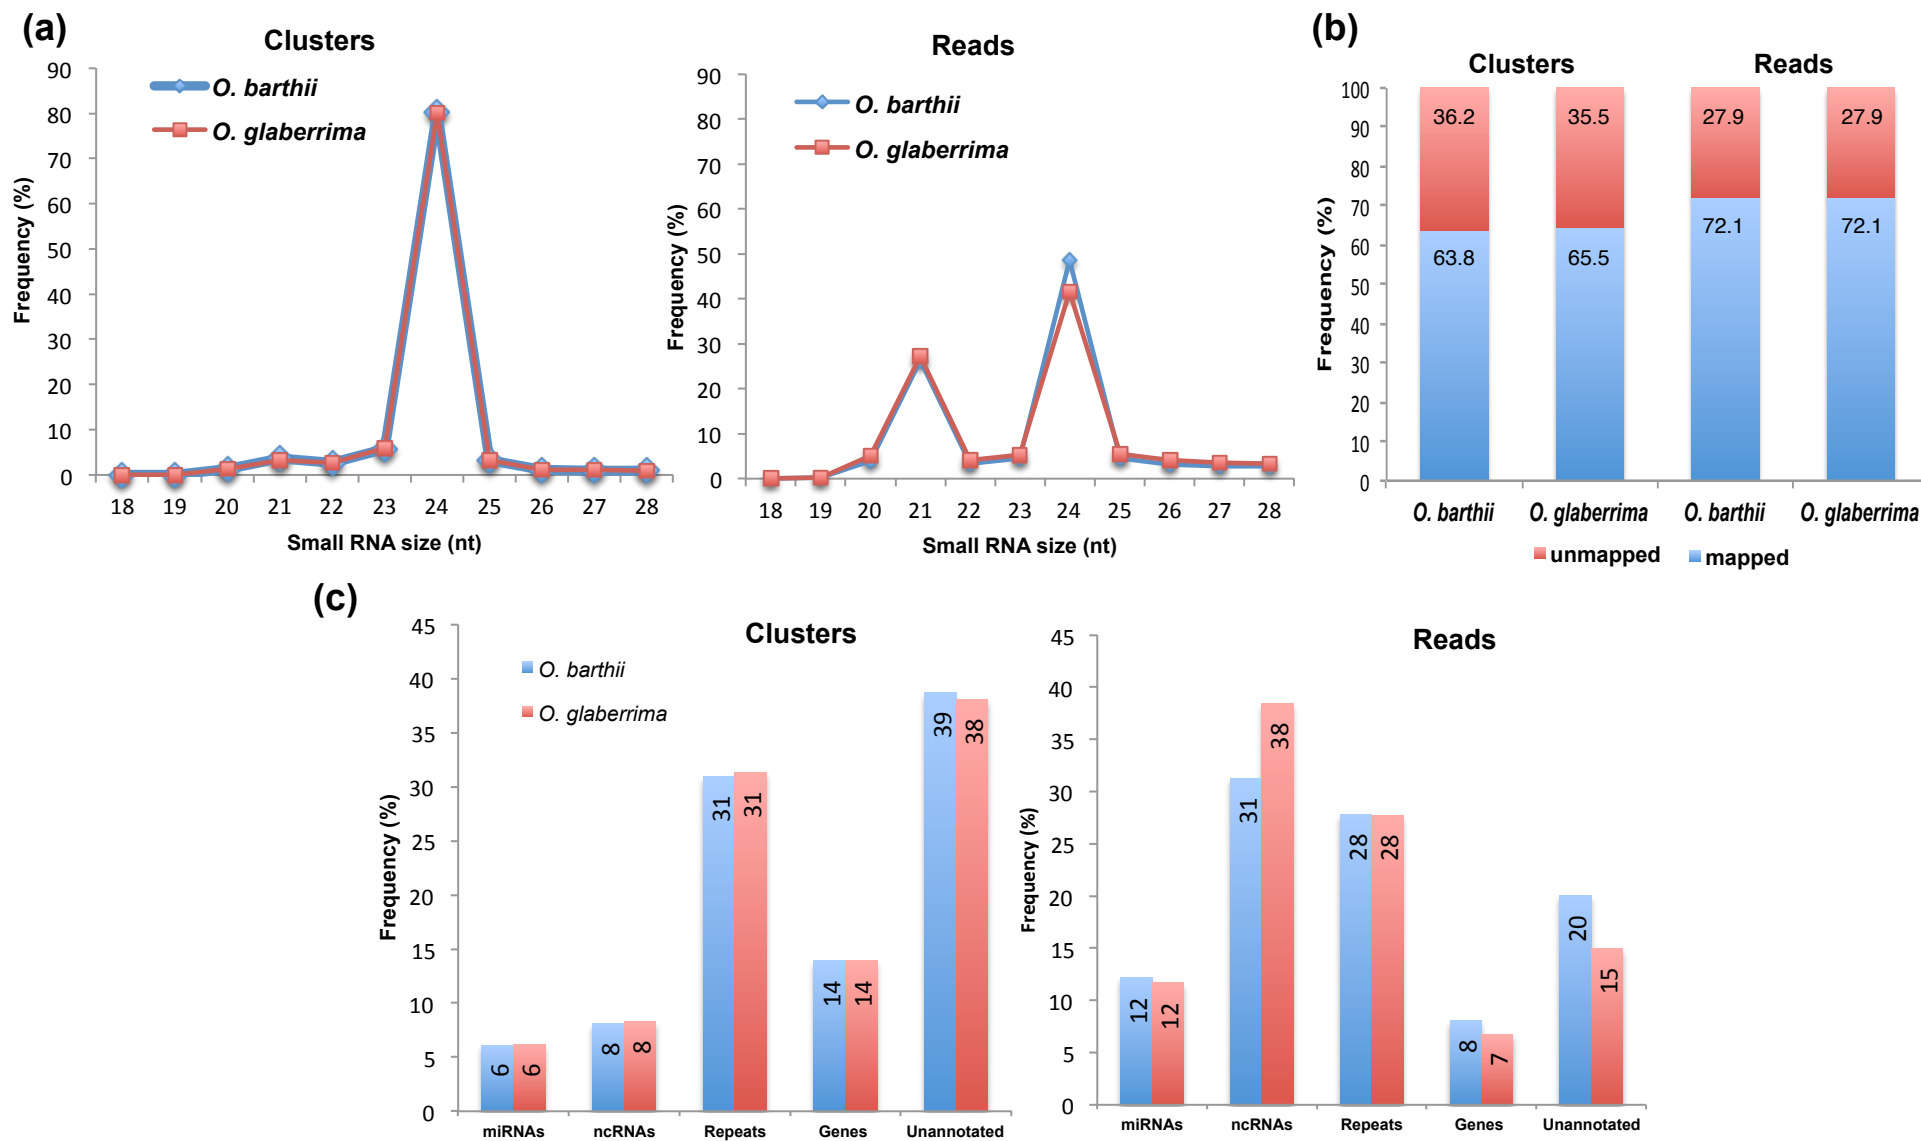

(d)

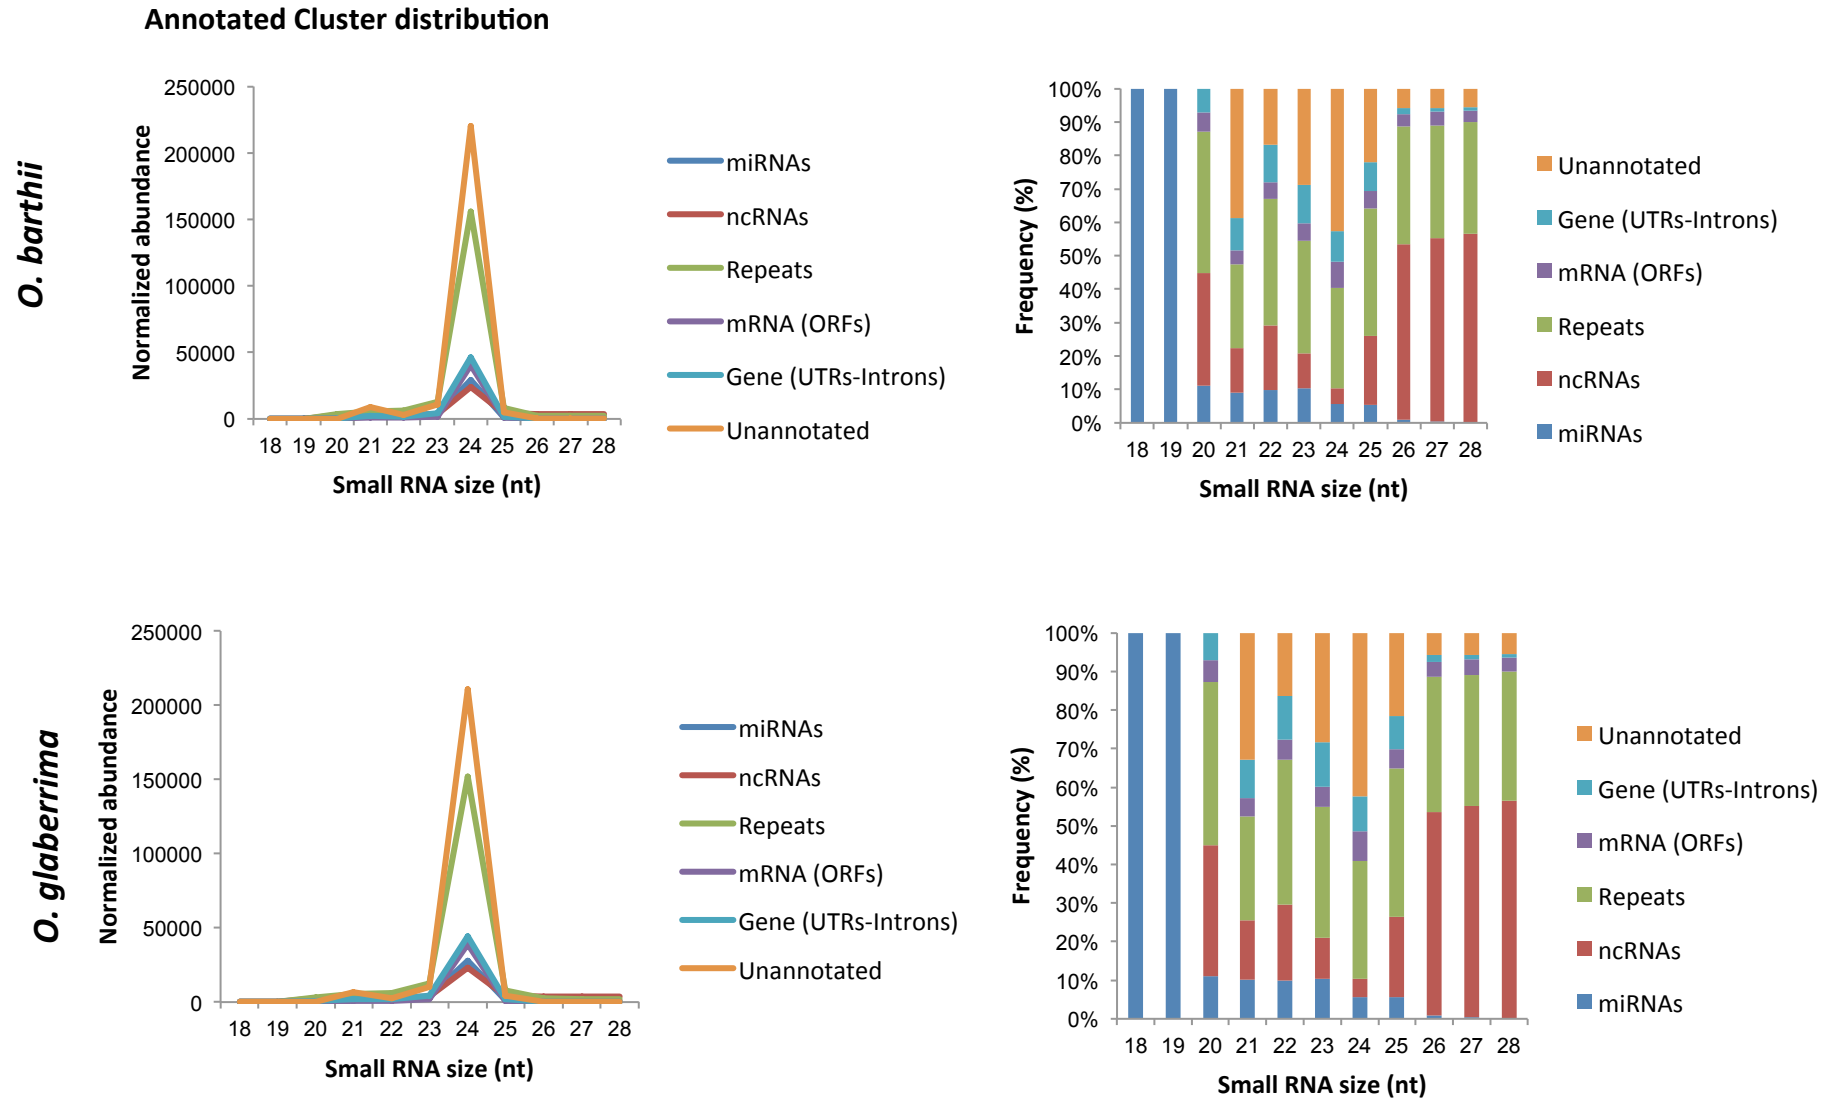

(e)

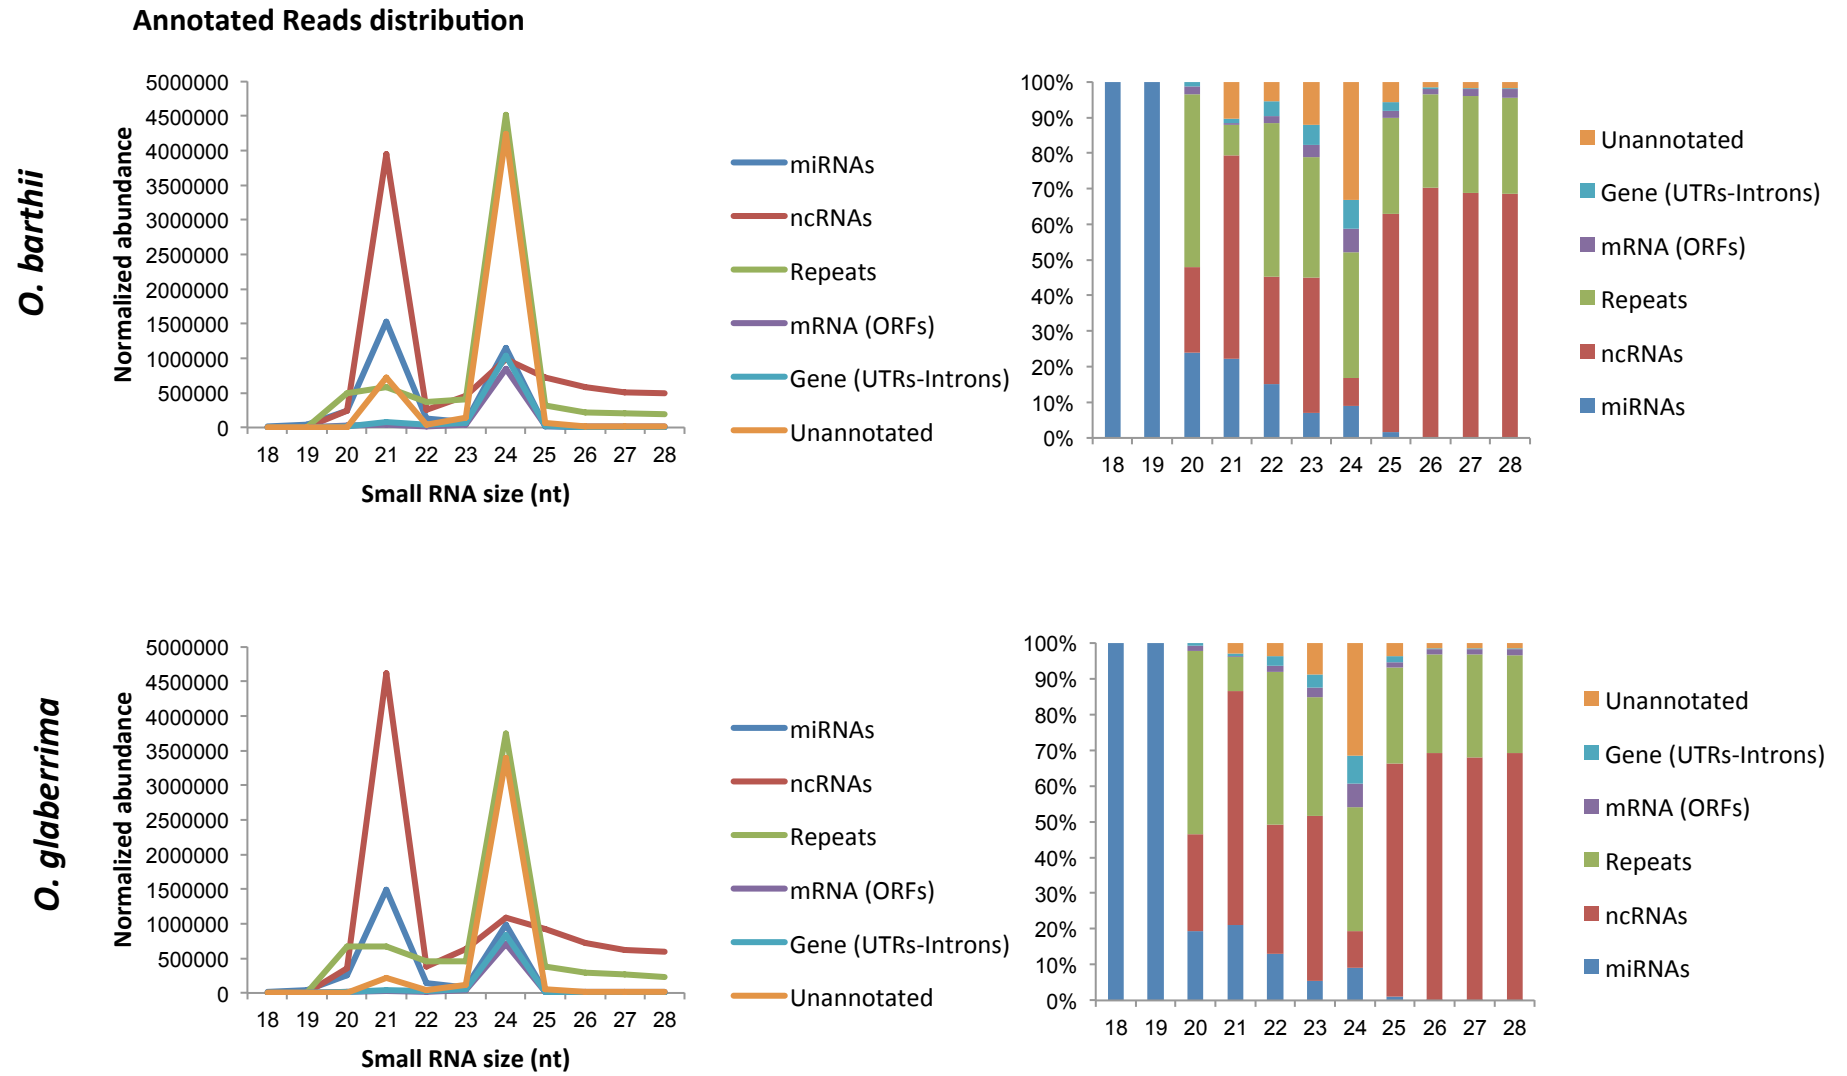

Supplement: 12284_2016_82_MOESM2_ESM.pdf [file 12284_2016_82_MOESM2_ESM.pdf]
