# Supplementary material for: miR2118-triggered phased siRNAs are differentially expressed during the panicle development of wild and domesticated African rice species
Source: PubMed Central journal article supplement (PMC4788661; doi:10.1186/s12284-016-0082-9), 2016-03-12
Supplement: 12284_2016_82_MOESM6_ESM.pdf [file 12284_2016_82_MOESM6_ESM.pdf]

**Additional file 6: 21-nt small RNAs associated to phased loci and mature miRNA families detected in young panicles of *O. glaberrima* and *O. barthii*.**

(a) *O. sativa* Nipponbare loci associated with 21-nt phased and unphased sRNAs from *O. barthii* and *O. glaberrima* detected using sRNAworkbench. ALT\_name: corresponding locus name in Song et al. (2012a); Chr: chromosome number; Positions (sRNAworkbench): position of the detected locus on chromosome (*O. sativa* reference genome MSU 7.0); Dist./w/previous (bp): distance from previous locus in bp; MEME motif position (bp): position of the MEME motif from the 5' end of the detected locus; Size of MEME (bp): length of the detected locus with MEME motif (default=251 bp without MEME motif); Phased clusters nb (Ob\_Og): number of associated phasiRNAs in *O. barthii* and *O. glaberrima* respectively; Unphased clusters nb (Ob\_Og): number of associated non-phased small RNAs in *O. barthii* and *O. glaberrima* respectively; Common clusters nb: number of common phasiRNA sequences between *O. barthii* and *O. glaberrima*; Diff exp cluster nb: number of phasiRNA sequences differentially expressed between *O. barthii* and *O. glaberrima*; Total\_reads nb (Ob\_Og): total number of small RNA reads in *O. barthii* and *O. glaberrima* respectively; Total\_unphased\_reads (Ob\_Og): total number of unphased small RNA reads in *O. barthii* and *O. glaberrima* respectively; Shared cluster nb: name of phased loci sharing common phasiRNA sequences (numbers indicated in brackets); Annotation\_Pipeline: annotation output-pip of phasiRNA sequences for the corresponding phased loci from our customized annotation pipeline (NA: no annotation); Annotated cluster nb: number of phasiRNA sequences annotated for the corresponding phased locus.

| Name   | ALT_name    | Chr   | Positions (sRNAworkbench) | Dist./w/previous (bp) | MEME motif position (bp) | Size of MEME (bp) | Phased clusters nb (Ob_Og) | Unphased clusters nb (Ob_Og) | Common clusters nb | Diff exp cluster nb | Total_reads nb (Ob_Og) | Total_phased_reads (Ob_Og) | Total_unphased_reads (Ob_Og)   | Annotation_Pipeline         | Annotated cluster nb |
|--------|-------------|-------|---------------------------|-----------------------|--------------------------|-------------------|----------------------------|------------------------------|--------------------|---------------------|------------------------|----------------------------|--------------------------------|-----------------------------|----------------------|
| PH-10  | -           | Chr01 | 2218876-2218876           | 404                   | 4                        | 1.1               | 53                         | 1                            | 4                  | 1                   | 404                    | 4                          | 0                              | NA                          | 0                    |
| PH-11  | -           | Chr01 | 2236699-2236950           | 572                   | 5                        | 3.03              | 7                          | 0                            | 9                  | 5                   | 468, 74                | 468, 74                    | 0.0                            | NA                          | 0                    |
| PH-12  | -           | Chr01 | 2244238-2244489           | 4288                  | -95                      | 346               | 11.9                       | 9                            | 10                 | 4089, 788           | 4089, 788              | 0.0                        | NA                             | 0                           |                      |
| PH-13  | phasi_NO7   | Chr01 | 2313038-2313289           | 68549                 | ND                       | 551               | 5.0                        | 0                            | 4                  | 179, 0              | 179, 0                 | 0.0                        | NA                             | 0                           |                      |
| PH-14  | phasi_NO18  | Chr01 | 2334980-2335231           | 21691                 | -158                     | 4                 | 4.09                       | 2                            | 4                  | 2292, 130           | 2292, 130              | 0.0                        | NA                             | 0                           |                      |
| PH-15  | phasi_NO19  | Chr01 | 2342235-2342486           | 7004                  | ND                       | 251               | 3.1                        | 1                            | 3                  | 56, 3               | 56, 3                  | 0.0                        | NA                             | 0                           |                      |
| PH-16  | phasi_NO20  | Chr01 | 2348887-2349138           | 3001                  | -32                      | 283               | 8.4                        | 4                            | 9                  | 264, 14             | 264, 14                | 0.0                        | NA                             | 0                           |                      |
| PH-17  | phasi_NO21  | Chr01 | 2347234-2347485           | 1096                  | -95                      | 346               | 4.1                        | 1                            | 4                  | 92, 2               | 92, 2                  | 0.0                        | NA                             | 0                           |                      |
| PH-18  | phasi_NO22  | Chr01 | 2348046-2348297           | 561                   | -116                     | 367               | 4.3                        | 3                            | 3                  | 176, 6              | 176, 6                 | 0.0                        | NA                             | 0                           |                      |
| PH-19  | -           | Chr01 | 2349178-2349429           | 881                   | -53                      | 304               | 7.5                        | 2                            | 4                  | 173, 32             | 146, 20                | 27, 12                     | osa-MIR2118                    | 1                           |                      |
| PH-20  | -           | Chr01 | 4429716-4429967           | 2080287               | ND                       | 251               | 2.2                        | 1                            | 3                  | 0                   | 29, 33                 | 21, 27                     | 8, 6                           | Rep_LOC_Os12g31040,Rep_LOC_ | 3                    |
| PH-21  | -           | Chr01 | 6081577-6081828           | 1651610               | ND                       | 251               | 1.1                        | 0                            | 0                  | 22, 5               | 22, 6                  | 0.0                        | Rep_LOC_Os12g33500             | 1                           |                      |
| PH-22  | -           | Chr01 | 8214275-8214526           | 2132447               | ND                       | 251               | 3                          | 2                            | 0                  | 25, 43              | 17, 37                 | 8, 6                       | Rep_LOC_Os12g31040,Rep_LOC_    | 3                           |                      |
| PH-1   | -           | Chr01 | 10960748-10960999         | 2746222               | ND                       | 251               | 14, 14                     | 4                            | 4                  | 6522, 6520          | 4364, 4191             | 2158, 2329                 | Rep_RM_42-23                   | 6                           |                      |
| PH-2   | -           | Chr01 | 12990707-12990958         | 2029708               | ND                       | 251               | 4.3                        | 2                            | 2                  | 811, 46             | 0                      | 0                          | Rep_RM_42-23                   | 6                           |                      |
| PH-3   | -           | Chr01 | 12996023-12996274         | 5065                  | ND                       | 251               | 4                          | 3                            | 4                  | 811, 46             | 0                      | 0                          | Rep_RM_42-23                   | 6                           |                      |
| PH-4   | -           | Chr01 | 13253800-13254051         | 257526                | ND                       | 251               | 2.2                        | 0                            | 0                  | 27, 33              | 19, 27                 | 8, 6                       | Rep_ORSTRTM00000708,Rep_Lo     | 3                           |                      |
| PH-5   | -           | Chr01 | 19132002-19132253         | 5879951               | ND                       | 251               | 2.2                        | 1                            | 3                  | 25, 43              | 17, 37                 | 8, 6                       | Rep_LOC_Os12g31040,Rep_LOC_    | 3                           |                      |
| PH-6   | phasi_NO31  | Chr01 | 19145059-19145310         | 12806                 | ND                       | 251               | 4, 4                       | 4                            | 7                  | 848, 182            | 366, 73                | 482, 109                   | Rep_LOC_Os01g34710             | 8                           |                      |
| PH-7   | -           | Chr01 | 20909869-20911120         | 945559                | ND                       | 251               | 3.0                        | 0                            | 3                  | 68, 0               | 68, 0                  | 0.0                        | NA                             | 0                           |                      |
| PH-8   | phasi_NO40  | Chr01 | 20452859-20453110         | 361739                | ND                       | 251               | 5.0                        | 0                            | 6                  | 174, 0              | 161, 0                 | 13, 0                      | NA                             | 0                           |                      |
| PH-9   | phasi_NO42  | Chr01 | 20457869-20458120         | 4759                  | ND                       | 251               | 3, 2                       | 3                            | 2                  | 2178, 26            | 2178, 26               | 0.0                        | NA                             | 0                           |                      |
| PH-20  | phasi_NO50  | Chr01 | 34219202-34219453         | 13761082              | -32                      | 4                 | 283                        | 4                            | 4                  | 458, 40             | 458, 40                | 0.0                        | NA                             | 0                           |                      |
| PH-21  | -           | Chr01 | 3422239-3422490           | 726                   | -32                      | 283               | 9.5                        | 7                            | 7                  | 1932, 217           | 1931, 117              | 0                          | NA                             | 0                           |                      |
| PH-22  | -           | Chr01 | 34227269-34227520         | 4779                  | -11                      | 262               | 10, 10                     | 11                           | 6                  | 1291, 275           | 1208, 251              | 83, 24                     | NA                             | 0                           |                      |
| PH-23  | phasi_NO54  | Chr01 | 34229064-34229315         | 1544                  | -32                      | 283               | 9.9                        | 9                            | 5                  | 600, 181            | 600, 181               | 0.0                        | NA                             | 0                           |                      |
| PH-24  | -           | Chr01 | 34254108-34254359         | 2492                  | -32                      | 283               | 9.7                        | 7                            | 9                  | 397, 27             | 397, 27                | 0.0                        | LOC_Os09g45220                 | 1                           |                      |
| PH-902 | -           | Chr01 | 34254423-34254674         | 64                    | -74                      | 325               | 3, 3                       | 3                            | 3                  | 76, 9               | 63, 9                  | 13, 0                      | LOC_Os09g45220                 | 1                           |                      |
| PH-25  | phasi_NO56  | Chr01 | 34256928-34257179         | 2254                  | -95                      | 346               | 6.5                        | 3                            | 7                  | 1002, 93            | 402, 37                | 600, 56                    | NA                             | 0                           |                      |
| PH-26  | -           | Chr01 | 34278634-34278885         | 21455                 | -32                      | 283               | 4, 1                       | 0                            | 3                  | 342, 1              | 212, 1                 | 19, 0                      | LOC_Os11g59300                 | 5                           |                      |
| PH-27  | phasi_NO58  | Chr01 | 34285506-34285757         | 6621                  | -32                      | 364               | 3                          | 3                            | 3                  | 108, 8              | 108, 8                 | 0.0                        | NA                             | 0                           |                      |
| PH-28  | -           | Chr01 | 34289649-34289900         | 3892                  | -74                      | 354               | 6.4                        | 3                            | 3                  | 470, 50             | 433, 38                | 37, 12                     | Rep_LOC_Os11g14160             | 1                           |                      |
| PH-29  | -           | Chr01 | 34291116-34291367         | 1216                  | -4                       | 364               | 6.4                        | 4                            | 4                  | 482, 27             | 482, 27                | 0.0                        | Rep_ORSTRTM00000003,RF00177    | 31                          |                      |
| PH-369 | -           | Chr02 | 109-360                   | ND                    | 109-360                  | ND                | 11, 11                     | 31                           | 1                  | 1488, 1778          | 534, 643               | 954, 1135                  | osa-MIR818                     | 8                           |                      |
| PH-370 | -           | Chr02 | 1486835-1487086           | 1486475               | -54                      | 304               | 8.4                        | 4                            | 5                  | 225, 38             | 225, 38                | 0.0                        | NA                             | 0                           |                      |
| PH-371 | -           | Chr02 | 1487616-1487867           | 530                   | -32                      | 283               | 3                          | 3                            | 3                  | 151, 20             | 151, 20                | 0.0                        | NA                             | 0                           |                      |
| PH-372 | -           | Chr02 | 1494817-1495068           | 6950                  | -74                      | 325               | 5, 2                       | 5                            | 10                 | 610, 140            | 500, 45                | 110, 95                    | osa-MIR818                     | 8                           |                      |
| PH-373 | -           | Chr02 | 1512313-1512564           | 1251                  | ND                       | 251               | 4.6                        | 2                            | 2                  | 432, 105            | 405, 93                | 27, 19                     | Rep_LOC_Os12g17240             | 1                           |                      |
| PH-374 | -           | Chr02 | 1518227-1518478           | 5663                  | -292                     | 543               | 4, 1                       | 5                            | 3                  | 635, 67             | 242, 27                | 393, 40                    | NA                             | 0                           |                      |
| PH-375 | phasi_NO69  | Chr02 | 1520285-1520536           | 1807                  | -284                     | 535               | 3, 3                       | 2                            | 7                  | 1120, 130           | 769, 91                | 351, 39                    | LOC_Os02g03650                 | 9                           |                      |
| PH-376 | -           | Chr02 | 1522811-1522962           | 1745                  | -74                      | 325               | 4, 1                       | 3                            | 3                  | 1700, 136           | 1700, 136              | 0.0                        | LOC_Os02g03650,LOC_Os02g03651  | 5                           |                      |
| PH-377 | -           | Chr02 | 1527441-1527692           | 4379                  | -118                     | 369               | 7, 4                       | 1                            | 1                  | 1323, 235           | 1200, 217              | 123, 18                    | NA                             | 0                           |                      |
| PH-378 | -           | Chr02 | 1528471-1528722           | 779                   | -11                      | 262               | 9, 6                       | 6                            | 7                  | 187, 32             | 187, 32                | 0.0                        | NA                             | 0                           |                      |
| PH-379 | phasi_NO73  | Chr02 | 1529336-15293725          | 1281                  | -74                      | 325               | 4, 1                       | 3                            | 3                  | 192, 25             | 192, 25                | 0.0                        | NA                             | 0                           |                      |
| PH-800 | phasi_NO74  | Chr02 | 1531583-1531834           | 858                   | -158                     | 409               | 8, 1                       | 4                            | 5                  | 424, 76             | 373, 67                | 51, 9                      | LOC_Os02g03670,6               | 3                           |                      |
| PH-422 | -           | Chr02 | 6188889-6189110           | 4637025               | ND                       | 251               | 3, 3                       | 0                            | 0                  | 27, 26              | 19, 17                 | 8, 9                       | Rep_LOC_Os09g04270,Rep_LOC_    | 4                           |                      |
| PH-367 | -           | Chr02 | 10531283-1053173          | 4637025               | ND                       | 251               | 4, 4                       | 4                            | 4                  | 111, 26             | 111, 26                | 0.0                        | NA                             | 0                           |                      |
| PH-368 | phasi_NO85  | Chr02 | 10654616-10654867         | 23082                 | ND                       | 251               | 1, 0                       | 2                            | 3                  | 611, 42             | 593, 42                | 18, 0                      | NA                             | 0                           |                      |
| PH-361 | -           | Chr02 | 1579573-15795964          | 5140846               | ND                       | 251               | 3, 3                       | 0                            | 4                  | 99, 9               | 99, 9                  | 0.0                        | NA                             | 0                           |                      |
| PH-382 | -           | Chr02 | 16566165-16566416         | 70201                 | -32                      | 283               | 5, 3                       | 3                            | 3                  | 317, 34             | 317, 34                | 0.0                        | NA                             | 0                           |                      |
| PH-383 | -           | Chr02 | 16567042-16567293         | 626                   | -32                      | 283               | 3, 3                       | 3                            | 3                  | 203, 16             | 190, 16                | 13, 0                      | NA                             | 0                           |                      |
| PH-384 | phasi_NO94  | Chr02 | 16578384-16578635         | 11091                 | -53                      | 304               | 6, 5                       | 5                            | 5                  | 453, 25             | 229, 25                | 224, 0                     | NA                             | 0                           |                      |
| PH-385 | -           | Chr02 | 16595564-16595805         | 6595                  | -74                      | 325               | 2, 1                       | 1                            | 1                  | 66, 2               | 66, 2                  | 0.0                        | NA                             | 0                           |                      |
| PH-386 | -           | Chr02 | 16596678-16596929         | 873                   | -35                      | 346               | 4, 3                       | 3                            | 5                  | 142, 15             | 66, 2                  | 76, 13                     | LOC_Os02g08030.1               | 3                           |                      |
| PH-387 | -           | Chr02 | 20200669-20200920         | 3603740               | -94                      | 343               | 8, 4                       | 4                            | 10                 | 814, 100            | 654, 83                | 160, 17                    | NA                             | 0                           |                      |
| PH-388 | phasi_NO156 | Chr02 | 20252721-20252972         | 504                   | -53                      | 304               | 7, 3                       | 3                            | 4                  | 400, 122            | 304, 11                | 96, 11                     | LOC_Os02g08030.1               | 3                           |                      |
| PH-389 | -           | Chr02 | 20253983-20254234         | 1011                  | -156                     | 403               | 3, 2                       | 3                            | 3                  | 88, 9               | 74, 7                  | 14, 2                      | NA                             | 0                           |                      |
| PH-390 | phasi_NO157 | Chr02 | 20257132-20257383         | 2898                  | -4                       | 364               | 4, 3                       | 4                            | 4                  | 191, 30             | 179, 30                | 14, 0                      | NA                             | 0                           |                      |
| PH-391 | phasi_NO158 | Chr02 | 20259469-20259720         | 1238                  | -11                      | 262               | 13, 9                      | 10                           | 11                 | 1850, 168           | 1445, 160              | 55, 8                      | NA                             | 0                           |                      |
| PH-392 | phasi_NO159 | Chr02 | 20262133-20262384         | 2413                  | -95                      | 346               | 6, 4                       | 4                            | 6                  | 942, 58             | 376, 22                | 566, 36                    | NA                             | 0                           |                      |
| PH-393 | -           | Chr02 | 20266964-20267215         | 4580                  | -95                      | 346               | 4, 4                       | 4                            | 4                  | 124, 25             | 124, 25                | 0.0                        | NA                             | 0                           |                      |
| PH-394 | -           | Chr02 | 20270910-20271161         | 3695                  | -94                      | 345               | 3, 3                       | 3                            | 6                  | 643, 56             | 119, 13                | 524, 43                    | NA                             | 0                           |                      |
| PH-395 | -           | Chr02 | 20281812-20282063         | 10651                 | -32                      | 283               | 3, 3                       | 3                            | 2                  | 91, 23              | 91, 23                 | 0.0                        | NA                             | 0                           |                      |
| PH-396 | -           | Chr02 | 20285047-20285298         | 2984                  | -61                      | 312               | 4, 4                       | 4                            | 4                  | 283, 36             | 283, 36                | 0.0                        | NA                             | 0                           |                      |
| PH-397 | -           | Chr02 | 20310107-20310358         | 24809                 | -3                       | 283               | 5, 3                       | 3                            | 5                  | 352, 38             | 352, 38                | 0.0                        | NA                             | 0                           |                      |
| PH-398 | phasi_NO98  | Chr02 | 20314183-20314434         | 23825                 | -53                      | 304               | 4, 3                       | 3                            | 6                  | 375, 26             | 168, 13                | 207, 13                    | NA                             | 0                           |                      |
| PH-399 | phasi_NO103 | Chr02 | 20315504-20315755         | 17070                 | -74                      | 325               | 6, 4                       | 4                            | 7                  | 361, 34             | 272, 26                | 89, 8                      | osa-MIR812,osa-MIR1862,RF01065 | 10                          |                      |
| PH-400 | phasi_NO105 | Chr02 | 20358293-20358544         | 6538                  | -74                      | 325               | 3, 2                       | 4                            | 3                  | 334, 29             | 238, 15                | 96, 14                     | NA                             | 0                           |                      |
| PH-401 | phasi_NO107 | Chr02 | 20363540-20363791         | 4096                  | -53                      | 304               | 6, 6                       | 0                            | 4                  | 235, 26             | 235, 26                | 0.0                        | NA                             | 0                           |                      |
| PH-402 | phasi_NO110 | Chr02 | 20393863-20394114         | 30072                 | -178                     | 429               | 0, 1                       | 1                            | 4                  | 54, 2               | 45, 0                  | 9, 2                       | NA                             | 0                           |                      |
| PH-403 | phasi_NO111 | Chr02 | 20396760-20397011         | 2646                  | -52                      | 283               | 10, 9                      | 9                            | 6                  | 1436, 292           | 1388, 292              | 48, 0                      | NA                             | 0                           |                      |
| PH-404 | phasi_NO112 | Chr02 | 20397962-20398213         | 951                   | -11                      | 262               | 4, 4                       | 4                            | 3                  | 177, 27             | 177, 27                | 0.0                        | NA                             | 0                           |                      |
| PH-405 | -           | Chr02 | 20399546-20399797         | 1333                  | ND                       | 251               | 3, 0                       | 0                            | 3                  | 123, 0              | 123, 0                 | 0.0                        | NA                             | 0                           |                      |
| PH-406 | phasi_NO113 | Chr02 | 20404001-20404252         | 4204                  | -200                     | 47                | 4, 0                       | 2                            | 2                  | 253, 18             | 163, 18                | 90, 0                      | NA                             | 0                           |                      |
| PH-407 | phasi_NO114 | Chr02 | 20481103-20481354         | 76851                 | -74                      | 325               | 7, 4                       | 4                            | 8                  | 383, 27             | 371, 27                | 12, 0                      | NA                             | 0                           |                      |
| PH-408 | phasi_NO119 | Chr02 | 22829596-22829847         | 2348422               | -158                     | 409               | 4, 4                       | 2                            | 6                  | 586, 115            | 584, 107               | 32, 8                      | NA                             | 0                           |                      |
| PH-409 | phasi_NO121 | Chr02 | 22834051-22834302         | 4204                  | -5                       | 283               | 3, 0                       | 0                            | 5                  | 463, 114            | 463, 114               | 0.0                        | NA                             | 0                           |                      |
| PH-410 | phasi_NO122 | Chr02 | 22840171-22840422         | 5869                  | -221                     | 472               | 12, 8                      | 9                            | 9                  | 480, 92             | 456, 88                | 24, 4                      | osa-MIR5514                    | 1                           |                      |
| PH-411 | -           | Chr02 | 22845839-22846090         | 5924                  | -158                     | 409               | 3, 2                       | 1                            | 4                  | 214, 15             | 172, 2                 | 42, 1                      | LOC_Os08g1950                  | 1                           |                      |
| PH-412 | phasi_NO123 | Chr02 | 22852127-22852378         | 6037                  |                          |                   |                            |                              |                    |                     |                        |                            |                                |                             |                      |

| Name   | Alt_name    | Chr   | Positions (sRNAworkbench) | Dist_w/previous (bp) | MEME motif position (bp) | Size_w/MEME (bp) | Phased clusters nb (Ob_Og) | Unphased_clusters nb (Ob_Og) | Common clusters nb | Diff exp cluster nb | Total_reads nb (Ob_Og) | Total phased_reads (Ob_Og) | Total unphased_reads (Ob_Og) | Annotation                       | Pipeline | Annotated cluster nb |   |
|--------|-------------|-------|---------------------------|----------------------|--------------------------|------------------|----------------------------|------------------------------|--------------------|---------------------|------------------------|----------------------------|------------------------------|----------------------------------|----------|----------------------|---|
| PH-442 | phasi_NO172 | Chr03 | 27563978-27564229         | 2726                 | -171                     | 422              | 4, 4                       | No                           | 4                  | 2                   | 141, 27                | 141, 27                    | 0, 0                         | NA                               |          | 0                    |   |
| PH-443 | -           | Chr03 | 27567071-27567227         | 2842                 | -176                     | 227              | 6, 5                       | 1                            | 7                  | 1715, 319           | 1470, 317              | 239, 2                     | 0, 0                         | NA                               |          | 0                    |   |
| PH-444 | -           | Chr03 | 27574502-27574753         | 7180                 | -174                     | 425              | 4, 2                       | 2, 2                         | 4                  | 5                   | 306, 24                | 94, 6                      | 212, 18                      | 0, 0                             | NA       |                      | 0 |
| PH-445 | -           | Chr03 | 27575885-27575936         | 932                  | -219                     | 470              | 5, 5                       | 3, 2                         | 5                  | 570, 140            | 494, 122               | 76, 18                     | 0, 0                         | NA                               |          | 0                    |   |
| PH-446 | -           | Chr03 | 27624773-27625024         | 1887                 | -137                     | 463              | 5, 5                       | 4, 2                         | 6                  | 197, 15             | 197, 15                | 0, 0                       | 0, 0                         | NA                               |          | 0                    |   |
| PH-447 | phasi_NO173 | Chr03 | 27633954-27634205         | 8930                 | -11                      | 262              | 5, 5                       | 5, 5                         | 5                  | 271, 55             | 174, 48                | 97, 7                      | 0, 0                         | NA                               |          | 0                    |   |
| PH-448 | phasi_NO174 | Chr03 | 27639324-27640175         | 5719                 | -116                     | 367              | 7, 7                       | 1, 2                         | 5                  | 297, 86             | 207, 74                | 90, 12                     | 0, 0                         | NA                               |          | 0                    |   |
| PH-449 | -           | Chr03 | 27641039-27641281         | 855                  | -74                      | 455              | 5, 5                       | 10, 9                        | 11                 | 512, 25             | 482, 90                | 29, 2                      | 0, 0                         | NA                               |          | 0                    |   |
| PH-450 | -           | Chr03 | 27642003-27642254         | 722                  | -32                      | 325              | 3, 2                       | 1, 0                         | 2                  | 367, 55             | 331, 55                | 36, 0                      | 0, 0                         | NA                               |          | 0                    |   |
| PH-451 | -           | Chr03 | 32275047-32275298         | 46322793             | 102                      | 353              | 6, 6                       | No                           | 6                  | 399, 100            | 399, 100               | 0, 0                       | 0, 0                         | NA                               |          | 0                    |   |
| PH-452 | phasi_NO177 | Chr03 | 32276367-32276618         | 1069                 | 1                        | 251              | 6, 6                       | 7, 6                         | 6                  | 1197, 160           | 1197, 160              | 0, 0                       | 0, 0                         | NA                               |          | 0                    |   |
| PH-453 | phasi_NO180 | Chr03 | 32278158-32278409         | 1540                 | ND                       | 251              | 3, 2                       | No                           | 2                  | 172, 32             | 172, 32                | 0, 0                       | 0, 0                         | NA                               |          | 0                    |   |
| PH-454 | phasi_NO181 | Chr03 | 32278976-32279227         | 2657                 | ND                       | 251              | 5, 5                       | No                           | 2                  | 858, 107            | 858, 107               | 0, 0                       | 0, 0                         | NA                               |          | 0                    |   |
| PH-455 | phasi_NO184 | Chr03 | 32296076-32296327         | 16849                | ND                       | 251              | 3, 2                       | No                           | 3                  | 172, 32             | 172, 32                | 0, 0                       | 0, 0                         | NA                               |          | 0                    |   |
| PH-456 | phasi_NO186 | Chr03 | 32298335-32298586         | 2008                 | ND                       | 251              | 7, 6                       | No                           | 2                  | 262, 28             | 262, 28                | 0, 0                       | 0, 0                         | NA                               |          | 0                    |   |
| PH-457 | -           | Chr03 | 32302320-32302571         | 3734                 | ND                       | 251              | 4, 3                       | No                           | 4                  | 229, 13             | 229, 13                | 0, 0                       | 0, 0                         | NA                               |          | 0                    |   |
| PH-458 | -           | Chr03 | 32305233-32305484         | 2662                 | ND                       | 251              | 4, 2                       | No                           | 6                  | 262, 28             | 262, 28                | 0, 0                       | 0, 0                         | NA                               |          | 0                    |   |
| PH-459 | phasi_NO188 | Chr03 | 32305957-32306208         | 473                  | ND                       | 251              | 3, 3                       | 1, 1                         | 3                  | 1772, 192           | 1738, 188              | 34, 4                      | 0, 0                         | NA                               |          | 0                    |   |
| PH-460 | phasi_NO189 | Chr03 | 32491130-32491381         | 25222                | ND                       | 251              | 4, 4                       | No                           | 4                  | 173, 15             | 173, 15                | 0, 0                       | 0, 0                         | NA                               |          | 0                    |   |
| PH-461 | -           | Chr03 | 32477716-32477967         | 18335                | ND                       | 251              | 2, 2                       | No                           | 2                  | 380, 15             | 380, 15                | 0, 0                       | 0, 0                         | NA                               |          | 0                    |   |
| PH-462 | phasi_NO190 | Chr03 | 32487508-32487759         | 9541                 | ND                       | 251              | 4, 2                       | No                           | 4                  | 322, 15             | 322, 15                | 0, 0                       | 0, 0                         | NA                               |          | 0                    |   |
| PH-463 | -           | Chr03 | 32496606-32496857         | 8307                 | ND                       | 251              | 3, 3                       | No                           | 2                  | 108, 15             | 108, 15                | 0, 0                       | 0, 0                         | NA                               |          | 0                    |   |
| PH-464 | -           | Chr03 | 32497374-32497625         | 1057                 | ND                       | 251              | 5, 5                       | No                           | 5                  | 357, 32             | 357, 32                | 0, 0                       | 0, 0                         | NA                               |          | 0                    |   |
| PH-465 | phasi_NO192 | Chr03 | 32498828-32499079         | 1203                 | ND                       | 251              | 5, 4                       | 2, 2                         | 6                  | 215, 29             | 115, 14                | 100, 15                    | 0, 0                         | NA                               |          | 0                    |   |
| PH-466 | -           | Chr03 | 32500299-32500550         | 1150                 | ND                       | 251              | 3, 3                       | 1, 0                         | 6                  | 447, 60             | 436, 60                | 11, 0                      | 0, 0                         | NA                               |          | 0                    |   |
| PH-467 | phasi_NO193 | Chr03 | 32503694-32503945         | 3214                 | ND                       | 251              | 2, 2                       | No                           | 2                  | 205, 19             | 205, 19                | 0, 0                       | 0, 0                         | NA                               |          | 0                    |   |
| PH-468 | phasi_NO197 | Chr03 | 32512725-32512976         | 8780                 | ND                       | 251              | 5, 5                       | No                           | 5                  | 250, 10             | 250, 10                | 0, 0                       | 0, 0                         | NA                               |          | 0                    |   |
| PH-469 | -           | Chr04 | 1004_1255                 | 20                   | ND                       | 251              | 11, 11                     | No                           | 11                 | 1488, 1778          | 1048, 1219             | 440, 559                   | 0, 0                         | Rep_ORSTRTM000000003,RF00177     |          | 31                   |   |
| PH-470 | -           | Chr04 | 9094594-9094845           | 9093339              | ND                       | 251              | 6, 6                       | 13, 13                       | 19                 | 199, 272            | 46, 64                 | 153, 208                   | 0, 0                         | RF00177,SSU_rRNA_bacteria,ACI_   |          | 19                   |   |
| PH-471 | -           | Chr04 | 10644528-10644779         | 1549683              | ND                       | 251              | 3, 3                       | No                           | 3                  | 20, 16              | 20, 16                 | 0, 0                       | 0, 0                         | Rep_LOC_05099g04270,Rep_LOC_     |          | 3                    |   |
| PH-472 | phasi_NO201 | Chr04 | 1293477-12934928          | 2098                 | ND                       | 251              | 6, 4                       | No                           | 4                  | 143, 12             | 143, 12                | 0, 0                       | 0, 0                         | NA                               |          | 0                    |   |
| PH-473 | -           | Chr04 | 12975020-12975271         | 281292               | ND                       | 251              | 1, 0                       | 4, 4                         | 3                  | 395, 37             | 375, 37                | 20, 0                      | 0, 0                         | NA                               |          | 0                    |   |
| PH-474 | -           | Chr04 | 13123948-13124199         | 148677               | ND                       | 251              | 10, 10                     | 3, 0                         | 3                  | 53, 0               | 53, 0                  | 0, 0                       | 0, 0                         | NA                               |          | 0                    |   |
| PH-475 | phasi_NO205 | Chr04 | 13164302-13164553         | 4923                 | ND                       | 251              | 4, 2                       | 0, 0                         | 4                  | 113, 16             | 181, 16                | 2, 0                       | 0, 0                         | NA                               |          | 0                    |   |
| PH-476 | phasi_NO208 | Chr04 | 13253758-13254009         | 89205                | ND                       | 251              | 3, 2                       | 3, 2                         | 2                  | 127, 12             | 127, 12                | 0, 0                       | 0, 0                         | Rep_LOC_0507g11530               |          | 1                    |   |
| PH-477 | -           | Chr04 | 13281747-13281998         | 27738                | ND                       | 251              | 4, 4                       | 1, 0                         | 3                  | 915, 85             | 900, 85                | 15, 0                      | 0, 0                         | NA                               |          | 0                    |   |
| PH-478 | -           | Chr04 | 13308763-13308999         | 26748                | ND                       | 251              | 5, 3                       | No                           | 3                  | 226, 8              | 95, 15                 | 131, 0                     | 0, 0                         | NA                               |          | 0                    |   |
| PH-479 | phasi_NO213 | Chr04 | 13341343-13341594         | 32346                | ND                       | 251              | 2, 1                       | 1, 1                         | 1                  | 26, 2               | 26, 2                  | 0, 0                       | 0, 0                         | NA                               |          | 0                    |   |
| PH-480 | phasi_NO223 | Chr04 | 14207138-14207389         | 82564                | ND                       | 251              | 6, 6                       | 2, 2                         | 8                  | 226, 8              | 226, 8                 | 0, 0                       | 0, 0                         | NA                               |          | 0                    |   |
| PH-481 | phasi_NO222 | Chr04 | 14289556-14289807         | 2167                 | ND                       | 251              | 3, 2                       | 2, 2                         | 2                  | 87, 6               | 87, 6                  | 0, 0                       | 0, 0                         | NA                               |          | 0                    |   |
| PH-482 | -           | Chr04 | 14295665-14295916         | 5858                 | ND                       | 251              | 2, 1                       | No                           | 2                  | 153, 4              | 153, 4                 | 0, 0                       | 0, 0                         | NA                               |          | 0                    |   |
| PH-483 | -           | Chr04 | 14565527-14565778         | 26611                | ND                       | 251              | 2, 2                       | No                           | 2                  | 169, 0              | 169, 0                 | 0, 0                       | 0, 0                         | NA                               |          | 0                    |   |
| PH-484 | phasi_NO247 | Chr04 | 14601266-14601517         | 35488                | ND                       | 251              | 5, 3                       | No                           | 5                  | 200, 17             | 200, 17                | 0, 0                       | 0, 0                         | NA                               |          | 0                    |   |
| PH-485 | phasi_NO248 | Chr04 | 14602066-14602317         | 549                  | ND                       | 251              | 4, 3                       | No                           | 4                  | 502, 73             | 456, 69                | 46, 4                      | 0, 0                         | NA                               |          | 0                    |   |
| PH-486 | -           | Chr04 | 14621098-14621349         | 18781                | ND                       | 251              | 3, 2                       | 4, 4                         | 4                  | 293, 16             | 293, 16                | 0, 0                       | 0, 0                         | NA                               |          | 0                    |   |
| PH-487 | phasi_NO227 | Chr04 | 14638124-14638375         | 16775                | ND                       | 251              | 3, 1                       | 2, 2                         | 7                  | 51, 7               | 51, 7                  | 0, 0                       | 0, 0                         | NA                               |          | 0                    |   |
| PH-488 | -           | Chr04 | 14639314-14639365         | 739                  | ND                       | 251              | 2, 2                       | 1, 0                         | 2                  | 146, 9              | 13, 0                  | 133, 9                     | 0, 0                         | LOC_0504g26160                   |          | 2                    |   |
| PH-489 | phasi_NO26  | Chr04 | 14642633-14642884         | 3268                 | ND                       | 251              | 1, 0                       | No                           | 1                  | 386, 0              | 39, 0                  | 357, 0                     | 0, 0                         | NA                               |          | 0                    |   |
| PH-490 | phasi_NO25  | Chr04 | 14669054-14669305         | 26170                | ND                       | 251              | 8, 4                       | No                           | 4                  | 554, 18             | 554, 18                | 0, 0                       | 0, 0                         | NA                               |          | 0                    |   |
| PH-491 | -           | Chr04 | 14685225-14685476         | 15920                | -32                      | 283              | 3, 2                       | No                           | 3                  | 75, 9               | 75, 9                  | 0, 0                       | 0, 0                         | NA                               |          | 0                    |   |
| PH-500 | -           | Chr04 | 14881392-14881643         | 8256                 | ND                       | 251              | 3, 1                       | No                           | 3                  | 270, 3              | 270, 3                 | 0, 0                       | 0, 0                         | NA                               |          | 0                    |   |
| PH-501 | -           | Chr04 | 14916634-14916885         | 34991                | -32                      | 283              | 4, 1                       | 4, 1                         | 4                  | 368, 8              | 368, 8                 | 0, 0                       | 0, 0                         | NA                               |          | 0                    |   |
| PH-502 | -           | Chr04 | 14935593-14935844         | 18708                | -32                      | 283              | 4, 1                       | 4, 1                         | 4                  | 333, 43             | 313, 43                | 20, 0                      | 0, 0                         | NA                               |          | 0                    |   |
| PH-503 | -           | Chr04 | 14959829-14959880         | 8256                 | -32                      | 283              | 2, 2                       | 2, 0                         | 2                  | 278, 148            | 278, 148               | 0, 0                       | 0, 0                         | LOC_0504g25740.1                 |          | 1                    |   |
| PH-504 | phasi_NO223 | Chr04 | 15004358-15004609         | 8255                 | -200                     | 451              | 6, 2                       | 2, 0                         | 6                  | 248, 10             | 23, 2                  | 225, 8                     | 0, 0                         | NA                               |          | 0                    |   |
| PH-505 | -           | Chr04 | 15116571-15116822         | 111962               | ND                       | 251              | 3, 2                       | No                           | 3                  | 75, 9               | 0, 0                   | 75, 9                      | 0, 0                         | NA                               |          | 0                    |   |
| PH-506 | -           | Chr04 | 15130243-15130494         | 13421                | -53                      | 304              | 7, 6                       | 2, 2                         | 9                  | 1506, 49            | 116, 22                | 90, 27                     | 0, 0                         | Rep_LOC_0512g18010,Rep_LOC_      |          | 2                    |   |
| PH-507 | phasi_NO89  | Chr04 | 15172781-15173032         | 42287                | -53                      | 304              | 4, 2                       | 4, 2                         | 4                  | 159, 7              | 159, 7                 | 0, 0                       | 0, 0                         | NA                               |          | 0                    |   |
| PH-510 | phasi_NO26  | Chr04 | 15180657-15180908         | 7625                 | -52                      | 283              | 7, 2                       | No                           | 7                  | 435, 12             | 420, 12                | 15, 0                      | 0, 0                         | NA                               |          | 0                    |   |
| PH-511 | -           | Chr04 | 15184241-15184492         | 3133                 | -32                      | 283              | 4, 4                       | No                           | 4                  | 154, 13             | 145, 13                | 9, 0                       | 0, 0                         | LOC_0504g26160                   |          | 2                    |   |
| PH-512 | -           | Chr04 | 15205729-15205980         | 21237                | ND                       | 251              | 4, 2                       | 4, 2                         | 2                  | 203, 10             | 203, 10                | 0, 0                       | 0, 0                         | NA                               |          | 0                    |   |
| PH-513 | -           | Chr04 | 15222712-15222963         | 16732                | ND                       | 251              | 6, 6                       | No                           | 6                  | 200, 17             | 154, 17                | 46, 0                      | 0, 0                         | NA                               |          | 0                    |   |
| PH-514 | phasi_NO47  | Chr04 | 15223514-15223765         | 531                  | ND                       | 251              | 5, 4                       | No                           | 5                  | 523, 76             | 523, 76                | 0, 0                       | 0, 0                         | NA                               |          | 0                    |   |
| PH-515 | -           | Chr04 | 15255397-15255648         | 41632                | ND                       | 283              | 5, 2                       | 5, 2                         | 5                  | 154, 5              | 154, 5                 | 0, 0                       | 0, 0                         | NA                               |          | 0                    |   |
| PH-516 | -           | Chr04 | 15272342-15272593         | 6594                 | -11                      | 283              | 6, 2                       | No                           | 6                  | 38, 6               | 38, 6                  | 0, 0                       | 0, 0                         | Rep_LOC_0504g26200,LOC_0504g2621 |          | 0                    |   |
| PH-517 | -           | Chr04 | 15274322-15274573         | 1729                 | -32                      | 283              | 4, 3                       | No                           | 3                  | 137, 10             | 137, 10                | 0, 0                       | 0, 0                         | NA                               |          | 0                    |   |
| PH-518 | -           | Chr04 | 17115995-17116246         | 1841422              | -32                      | 283              | 4, 4                       | 5, 4                         | 3                  | 435, 112            | 435, 112               | 0, 0                       | 0, 0                         | NA                               |          | 0                    |   |
| PH-519 | phasi_NO240 | Chr04 | 17200103-17200353         | 83856                | -179                     | 430              | 6, 6                       | 7, 7                         | 13                 | 1575, 251           | 1170, 188              | 405, 63                    | 0, 0                         | NA                               |          | 0                    |   |
| PH-520 | phasi_NO241 | Chr04 | 17211236-17211487         | 10883                | -116                     | 367              | 8, 8                       | 8, 8                         | 8                  | 2865, 604           | 1992, 412              | 873, 192                   | 0, 0                         | NA                               |          | 0                    |   |
| PH-521 | phasi_NO242 | Chr04 | 17216646-17216897         | 5159                 | -53                      | 304              | 5, 5                       | 5, 5                         | 4                  | 615, 79             | 615, 79                | 0, 0                       | 0, 0                         | NA                               |          | 0                    |   |
| PH-522 | phasi_NO243 | Chr04 | 17226492-17226743         | 9595                 | -32                      | 283              | 7, 6                       | 2, 2                         | 8                  | 1552, 199           | 1499, 189              | 53, 10                     | 0, 0                         | NA                               |          | 0                    |   |
| PH-523 | -           | Chr04 | 17230069-17230320         | 3326                 | -116                     | 367              | 5, 4                       | 1, 1                         | 3                  | 203, 42             | 135, 25                | 68, 17                     | 0, 0                         | NA                               |          | 0                    |   |
| PH-524 | phasi_NO244 | Chr04 | 17241895-17242146         | 11575                | -200                     | 451              | 3, 3                       | 3, 3                         | 1                  | 56, 14              | 56, 14                 | 0, 0                       | 0, 0                         | NA                               |          | 0                    |   |
| PH-525 | -           | Chr04 | 17245566-17245817         | 3420                 | -32                      | 283              | 4, 3                       | 1, 0                         | 6                  | 186, 39             | 173, 39                | 13, 0                      | 0, 0                         | NA                               |          | 0                    |   |
| PH-526 | phasi_NO246 | Chr04 | 17250458-17250709         | 4641                 | -200                     | 451              | 4, 4                       | 2, 1                         | 5                  | 149, 40             | 87, 23                 | 62, 17                     | 0, 0                         | NA                               |          | 0                    |   |
| PH-527 | -           | Chr04 | 17385333-17385584         | 134624               | -95                      | 346              | 3, 3                       | 1, 1                         | 2                  | 236, 40             | 225, 36                | 11, 4                      | 0, 0                         | NA                               |          | 0                    |   |
| PH-528 | phasi_NO251 | Chr04 | 17391441-173              |                      |                          |                  |                            |                              |                    |                     |                        |                            |                              |                                  |          |                      |   |

| Name   | Alt name    | Chr   | Positions (rNameWorkbench) | Dist. w./previous (bp) | MEME motif position (bp) | Size_w/MEME (bp) | Phased clusters nb (Ob_Og) | Unphased_clusters nb (Ob_Og) | Common clusters nb | Diff exp cluster nb | Total reads nb (Ob_Og) | Total phased reads (Ob_Og) | Total unphased reads (Ob_Og) | Annotation | Pipeline | Annotated cluster nb |
|--------|-------------|-------|----------------------------|------------------------|--------------------------|------------------|----------------------------|------------------------------|--------------------|---------------------|------------------------|----------------------------|------------------------------|------------|----------|----------------------|
| PH-560 | phasi_NO314 | Chr04 | 21087516-21087767          | 10097                  | -32                      | 283              | 7, 5                       | No                           | 4                  | 200                 | 200                    | 0, 0                       | NA                           |            | 0        |                      |
| PH-570 | phasi_NO315 | Chr05 | 21093611-21094112          | 2594                   | -116                     | 294              | 2, 2                       | 10                           | 7                  | 759                 | 99                     | 509                        | 509                          | 64         | 0        |                      |
| PH-571 | -           | Chr04 | 21092610-21092861          | 1909                   | -74                      | 325              | 3, 3                       | 4                            | 4                  | 428                 | 38                     | 38                         | 38                           | 11         | 0        |                      |
| PH-572 | -           | Chr04 | 21095370-21095621          | 2058                   | -32                      | 283              | 6, 2                       | 1, 1                         | 4                  | 167                 | 13                     | 13                         | 13                           | 4          | 0        |                      |
| PH-573 | -           | Chr04 | 21099824-21100075          | 4203                   | -200                     | 451              | 8, 4                       | 10                           | 8                  | 1468                | 116                    | 1179                       | 272                          | 19         | 0        |                      |
| PH-574 | -           | Chr04 | 21105467-21105718          | 5392                   | -137                     | 346              | 8, 6                       | 7                            | 8                  | 370                 | 38                     | 111                        | 117                          | 259        | 21       | 0                    |
| PH-966 | -           | Chr04 | 21105509-21105760          | 209                    | -95                      | 388              | 4, 3                       | 5                            | 5                  | 264                 | 21                     | 200                        | 16                           | 64         | 5        | 0                    |
| PH-575 | -           | Chr04 | 21121522-21121773          | 2752                   | -74                      | 325              | 6, 5                       | 7                            | 6                  | 179                 | 103                    | 355                        | 28                           | 119        | 14       | 0                    |
| PH-576 | -           | Chr04 | 21137865-21138116          | 16092                  | -94                      | 325              | 6, 6                       | 5                            | 5                  | 463                 | 56                     | 444                        | 56                           | 19         | 0        | 0                    |
| PH-577 | phasi_NO318 | Chr04 | 21141581-21141832          | 3465                   | -53                      | 304              | 6, 6                       | 6                            | 6                  | 386                 | 0                      | 158                        | 0                            | 228        | 0        | 0                    |
| PH-578 | -           | Chr04 | 21143188-21143439          | 1356                   | -32                      | 283              | 5, 4                       | 7                            | 7                  | 351                 | 37                     | 252                        | 31                           | 99         | 6        | 0                    |
| PH-579 | -           | Chr04 | 21144630-21145081          | 1391                   | -32                      | 283              | 5, 3                       | 4                            | 5                  | 242                 | 23                     | 233                        | 21                           | 9          | 2        | 0                    |
| PH-580 | -           | Chr04 | 21149610-21149861          | 4529                   | -11                      | 252              | 6, 4                       | 4                            | 5                  | 311                 | 32                     | 355                        | 28                           | 25         | 4        | 0                    |
| PH-581 | -           | Chr04 | 21161408-21161659          | 11547                  | -53                      | 304              | 5, 4                       | 5                            | 5                  | 436                 | 35                     | 418                        | 35                           | 18         | 0        | 0                    |
| PH-582 | phasi_NO319 | Chr04 | 21165734-21165985          | 4075                   | -158                     | 409              | 6, 6                       | 7                            | 5                  | 1428                | 189                    | 1299                       | 173                          | 129        | 16       | 0                    |
| PH-583 | phasi_NO320 | Chr04 | 21167759-21168010          | 1774                   | -116                     | 367              | 8, 7                       | 10                           | 6                  | 6707                | 686                    | 350                        | 49                           | 6357       | 637      | 0                    |
| PH-584 | -           | Chr04 | 21181136-21181387          | 13126                  | -32                      | 283              | 3, 3                       | 3                            | 3                  | 106                 | 17                     | 106                        | 17                           | 0          | 0        | 0                    |
| PH-585 | phasi_NO323 | Chr04 | 21191161-21191412          | 9774                   | -53                      | 304              | 4, 1                       | 1                            | 5                  | 101                 | 10                     | 63                         | 5                            | 38         | 5        | 0                    |
| PH-586 | phasi_NO326 | Chr04 | 21220702-21220953          | 9790                   | -74                      | 325              | 5, 2                       | 2                            | 5                  | 103                 | 6                      | 89                         | 6                            | 14         | 0        | 0                    |
| PH-587 | -           | Chr04 | 21223558-21223809          | 22605                  | -158                     | 409              | 3, 1                       | 4                            | 4                  | 117                 | 3                      | 96                         | 3                            | 21         | 0        | 0                    |
| PH-588 | phasi_NO329 | Chr04 | 21225840-21226091          | 2031                   | -254                     | 505              | 5, 4                       | 4                            | 7                  | 515                 | 59                     | 441                        | 51                           | 74         | 8        | 0                    |
| PH-589 | -           | Chr04 | 24905399-24905650          | 2679308                | ND                       | 251              | 15, 15                     | 43                           | 12                 | 4422                | 2837                   | 3532                       | 2367                         | 890        | 570      | 44                   |
| PH-601 | -           | Chr05 | 16-267                     | ..                     | ND                       | 251              | 20, 20                     | 30                           | 1                  | 1465                | 1768                   | 572                        | 710                          | 893        | 1058     | 30                   |
| PH-603 | -           | Chr05 | 2077235-2077486            | 2076968                | ND                       | 251              | 2, 2                       | 0                            | 0                  | 27                  | 33                     | 19                         | 27                           | 8          | 6        | 3                    |
| PH-641 | -           | Chr05 | 3086673-3086924            | 1009187                | -190                     | 441              | 8, 7                       | 10                           | 6                  | 373                 | 87                     | 289                        | 75                           | 84         | 12       | 0                    |
| PH-642 | -           | Chr05 | 3092726-3092977            | 5802                   | -53                      | 304              | 3, 3                       | 5                            | 4                  | 125                 | 21                     | 92                         | 13                           | 33         | 8        | 0                    |
| PH-643 | phasi_NO349 | Chr05 | 3101560-3101811            | 8583                   | -95                      | 346              | 6, 5                       | 9                            | 13                 | 909                 | 92                     | 614                        | 77                           | 295        | 15       | 0                    |
| PH-644 | phasi_NO350 | Chr05 | 3102631-3102882            | 946                    | -86                      | 346              | 3, 2                       | 2                            | 3                  | 341                 | 52                     | 341                        | 52                           | 0          | 0        | 0                    |
| PH-645 | phasi_NO351 | Chr05 | 3104481-3104732            | 1599                   | -263                     | 514              | 3, 3                       | 3                            | 2                  | 89                  | 137                    | 57                         | 137                          | 32         | 0        | 0                    |
| PH-646 | -           | Chr05 | 3113786-3114037            | 9054                   | -32                      | 283              | 5, 5                       | 5                            | 3                  | 179                 | 25                     | 179                        | 25                           | 0          | 0        | 0                    |
| PH-647 | -           | Chr05 | 3117499-3117750            | 3062                   | -32                      | 283              | 3, 2                       | 2                            | 3                  | 71                  | 62                     | 77                         | 5                            | 0          | 0        | 0                    |
| PH-648 | phasi_NO352 | Chr05 | 3123438-3123689            | 5688                   | -74                      | 325              | 6, 5                       | 8                            | 5                  | 262                 | 61                     | 226                        | 44                           | 36         | 17       | 0                    |
| PH-649 | phasi_NO353 | Chr05 | 3124528-3124779            | 839                    | -116                     | 367              | 5, 4                       | 4                            | 3                  | 539                 | 97                     | 539                        | 97                           | 0          | 0        | 0                    |
| PH-650 | phasi_NO355 | Chr05 | 3131693-3131944            | 2914                   | -84                      | 367              | 6, 2                       | 4                            | 3                  | 671                 | 73                     | 671                        | 73                           | 380        | 51       | 0                    |
| PH-651 | -           | Chr05 | 3133811-3134062            | 1867                   | -116                     | 367              | 5, 4                       | 6                            | 5                  | 329                 | 69                     | 152                        | 23                           | 177        | 46       | 0                    |
| PH-652 | -           | Chr05 | 3138524-3138775            | 2462                   | -53                      | 304              | 4, 2                       | 2                            | 3                  | 52                  | 5                      | 52                         | 5                            | 0          | 0        | 0                    |
| PH-653 | phasi_NO356 | Chr05 | 3140548-3140800            | 783                    | -95                      | 346              | 12, 10                     | 12                           | 8                  | 603                 | 126                    | 803                        | 126                          | 0          | 0        | 0                    |
| PH-654 | -           | Chr05 | 3146517-3146768            | 5708                   | -32                      | 283              | 6, 6                       | 2                            | 3                  | 120                 | 43                     | 120                        | 43                           | 0          | 0        | 0                    |
| PH-655 | -           | Chr05 | 3149519-3149770            | 2243                   | -32                      | 283              | 3, 3                       | 3                            | 2                  | 86                  | 14                     | 86                         | 14                           | 0          | 0        | 0                    |
| PH-656 | phasi_NO360 | Chr05 | 3159932-3160183            | 10162                  | -137                     | 388              | 6, 5                       | 5                            | 2                  | 891                 | 129                    | 859                        | 124                          | 32         | 5        | 0                    |
| PH-657 | -           | Chr05 | 3169026-3169277            | 8843                   | -305                     | 556              | 5, 4                       | 8                            | 6                  | 351                 | 86                     | 272                        | 72                           | 79         | 14       | 0                    |
| PH-658 | phasi_NO362 | Chr05 | 6099519-6099770            | 2092242                | -32                      | 283              | 4, 4                       | 4                            | 4                  | 717                 | 106                    | 717                        | 106                          | 0          | 0        | 0                    |
| PH-660 | -           | Chr05 | 6104771-6105022            | 5001                   | -32                      | 283              | 4, 3                       | 3                            | 4                  | 325                 | 68                     | 325                        | 68                           | 0          | 0        | 0                    |
| PH-661 | -           | Chr05 | 6131590-6131841            | 26568                  | -32                      | 283              | 5, 5                       | 5                            | 4                  | 173                 | 22                     | 173                        | 22                           | 0          | 0        | 0                    |
| PH-662 | phasi_NO364 | Chr05 | 6133322-6133573            | 2561                   | -200                     | 451              | 2, 1                       | 0                            | 2                  | 493                 | 2                      | 493                        | 2                            | 2864       | 0        | 0                    |
| PH-663 | phasi_NO365 | Chr05 | 6140612-6140863            | 7029                   | -32                      | 283              | 1, 4                       | 3                            | 4                  | 169                 | 118                    | 3                          | 84                           | 166        | 34       | 0                    |
| PH-664 | phasi_NO366 | Chr05 | 6143841-6144092            | 2978                   | -157                     | 408              | 3, 3                       | 5                            | 5                  | 219                 | 41                     | 152                        | 24                           | 67         | 17       | 0                    |
| PH-665 | -           | Chr05 | 8129379-8129630            | 1952827                | ND                       | 251              | 3, 2                       | 2                            | 4                  | 292                 | 13                     | 292                        | 13                           | 0          | 0        | 0                    |
| PH-666 | phasi_NO371 | Chr05 | 8177448-8177699            | 37818                  | -164                     | 415              | 3, 2                       | 2                            | 3                  | 67                  | 6                      | 67                         | 6                            | 0          | 0        | 0                    |
| PH-667 | phasi_NO374 | Chr05 | 8246982-8247233            | 69293                  | -157                     | 408              | 5, 3                       | 6                            | 4                  | 296                 | 55                     | 254                        | 48                           | 42         | 7        | 0                    |
| PH-668 | phasi_NO378 | Chr05 | 13959829-13960080          | 251                    | ND                       | 251              | 5, 5                       | 4                            | 6                  | 251                 | 1                      | 665                        | 81                           | 41         | 2        | 3                    |
| PH-592 | phasi_NO380 | Chr05 | 1396254-1396275            | 2444                   | ND                       | 251              | 6, 4                       | 6                            | 6                  | 975                 | 20                     | 975                        | 20                           | 0          | 0        | 0                    |
| PH-593 | phasi_NO379 | Chr05 | 1397622-1397683            | 13847                  | ND                       | 251              | 8, 7                       | 4                            | 6                  | 1486                | 300                    | 1486                       | 300                          | 0          | 0        | 0                    |
| PH-594 | phasi_NO380 | Chr05 | 13979283-13979534          | 2951                   | ND                       | 251              | 6, 2                       | 6                            | 6                  | 690                 | 18                     | 690                        | 18                           | 0          | 0        | 0                    |
| PH-595 | phasi_NO381 | Chr05 | 13984468-13984719          | 4934                   | ND                       | 251              | 9, 7                       | 7                            | 9                  | 2080                | 279                    | 2080                       | 279                          | 0          | 0        | 0                    |
| PH-596 | phasi_NO382 | Chr05 | 1398672-13987023           | 2053                   | ND                       | 251              | 6, 5                       | 5                            | 5                  | 522                 | 76                     | 522                        | 76                           | 0          | 0        | 0                    |
| PH-597 | -           | Chr05 | 14006351-14006602          | 19028                  | ND                       | 251              | 1, 1                       | 2                            | 2                  | 699                 | 251                    | 70                         | 3                            | 199        | 10       | 0                    |
| PH-598 | -           | Chr05 | 14006866-14007117          | 64                     | ND                       | 251              | 4, 3                       | 3                            | 5                  | 889                 | 38                     | 889                        | 38                           | 11         | 0        | 0                    |
| PH-599 | -           | Chr05 | 1401728-14017579           | 10611                  | ND                       | 251              | 4, 1                       | 4                            | 4                  | 153                 | 11                     | 153                        | 11                           | 0          | 0        | 0                    |
| PH-600 | -           | Chr05 | 14746300-14747171          | 28841                  | ND                       | 251              | 4, 2                       | 6                            | 4                  | 1042                | 59                     | 684                        | 43                           | 2          | 7        | 0                    |
| PH-602 | phasi_NO385 | Chr05 | 19141869-19142120          | 4394698                | -74                      | 325              | 6, 6                       | 6                            | 6                  | 776                 | 84                     | 776                        | 84                           | 0          | 0        | 0                    |
| PH-603 | -           | Chr05 | 2478997-24790248           | 564877                 | -157                     | 408              | 5, 4                       | 5                            | 5                  | 307                 | 32                     | 278                        | 27                           | 25         | 5        | 0                    |
| PH-605 | -           | Chr05 | 24797748-2479999           | 7500                   | -93                      | 344              | 4, 2                       | 5                            | 5                  | 139                 | 5                      | 104                        | 5                            | 35         | 0        | 0                    |
| PH-606 | -           | Chr05 | 24802174-24802425          | 4175                   | -53                      | 304              | 5, 1                       | 4                            | 4                  | 109                 | 20                     | 85                         | 4                            | 24         | 16       | 0                    |
| PH-607 | phasi_NO389 | Chr05 | 24806141-24806392          | 394                    | -53                      | 304              | 9, 8                       | 6                            | 6                  | 1041                | 156                    | 1041                       | 156                          | 0          | 0        | 0                    |
| PH-608 | phasi_NO391 | Chr05 | 24825085-24825336          | 18693                  | -32                      | 283              | 4, 3                       | 7                            | 7                  | 229                 | 10                     | 119                        | 5                            | 110        | 5        | 0                    |
| PH-609 | -           | Chr05 | 24833655-24833906          | 8319                   | -32                      | 283              | 3, 2                       | 6                            | 6                  | 601                 | 22                     | 503                        | 18                           | 98         | 4        | 0                    |
| PH-610 | phasi_NO398 | Chr05 | 24867350-24867601          | 3244                   | -32                      | 283              | 5, 3                       | 3                            | 12                 | 938                 | 63                     | 893                        | 63                           | 45         | 0        | 0                    |
| PH-611 | phasi_NO399 | Chr05 | 24870411-24870662          | 2810                   | -53                      | 304              | 5, 3                       | 3                            | 3                  | 554                 | 26                     | 528                        | 26                           | 0          | 0        | 0                    |
| PH-612 | -           | Chr05 | 24872805-24873056          | 2143                   | -74                      | 325              | 10, 8                      | 11                           | 11                 | 3007                | 232                    | 2987                       | 229                          | 20         | 3        | 0                    |
| PH-613 | phasi_NO400 | Chr05 | 24877466-24877717          | 4410                   | -116                     | 367              | 12, 10                     | 12                           | 6                  | 1041                | 156                    | 1041                       | 156                          | 0          | 0        | 0                    |
| PH-614 | phasi_NO402 | Chr05 | 24893510-24893761          | 15793                  | -32                      | 283              | 2, 2                       | 9                            | 9                  | 1454                | 68                     | 530                        | 63                           | 924        | 5        | 0                    |
| PH-615 | phasi_NO403 | Chr05 | 24896162-24896413          | 2401                   | -74                      | 325              | 7, 1                       | 1                            | 8                  | 882                 | 2                      | 865                        | 2                            | 17         | 0        | 0                    |
| PH-616 | phasi_NO404 | Chr05 | 24906104-24906355          | 9991                   | -53                      | 304              | 5, 2                       | 3                            | 6                  | 297                 | 22                     | 246                        | 20                           | 51         | 2        | 0                    |
| PH-617 | phasi_NO404 | Chr05 | 24907229-24907480          | 874                    | -11                      | 282              | 4, 2                       | 3                            | 3                  | 66                  | 7                      | 66                         | 7                            | 0          | 0        | 0                    |
| PH-618 | phasi_NO404 | Chr05 | 24907596-24907847          | 116                    | -378                     | 629              | 8, 6                       | 6                            | 6                  | 452                 | 64                     | 386                        | 57                           | 66         | 7        | 0                    |
| PH-619 | phasi_NO405 | Chr05 | 24908243-24908494          | 396                    | -137                     | 388              | 6, 5                       | 6                            | 5                  | 245                 | 17                     | 228                        | 17                           | 0          | 0        | 0                    |
| PH-620 | phasi_NO406 | Chr05 | 24912484-24912735          | 3990                   | -4                       | 367              | 4, 4                       | 9                            | 6                  | 4293                | 290                    | 313                        | 41                           | 3980       | 249      | 0                    |
| PH-621 | phasi_NO408 | Chr05 | 2493422-24935673           | 40687                  | -5                       | 450              | 4, 3                       | 7                            | 7                  | 2288                | 347                    | 2042                       | 71                           | 246        | 17       | 0                    |
| PH-622 | phasi_NO409 | Chr05 | 24962418-24962669          | 8745                   | -53                      | 304              | 9, 8                       | 13                           | 10                 | 4160                | 347                    | 4145                       | 347                          | 15         | 0        | 0                    |
| PH-623 | phasi_NO410 | Chr05 | 24965495-24965746          | 2826                   | -32                      | 283              | 12, 7                      | 10                           | 8                  | 425                 | 24                     | 399                        | 24                           | 26         | 0        | 0                    |
| PH-624 | -           | Chr05 | 24968712-24968963          | 2966                   | -137                     | 388              | 3, 1                       | 4                            | 4                  | 1321                | 60                     | 1300                       | 60                           | 21         | 0        | 0                    |
| PH-625 | -           | Chr05 | 25062333-25062584          | 9370                   | -137                     | 388              | 4, 4                       | 4                            | 1                  | 50</                |                        |                            |                              |            |          |                      |

| Name   | Alt_name    | Chr   | Positions (sRNAworkbench) | Dist    | w/previous (bp) | MEME motif position (bp) | Size_w/MEME (bp) | Phased clusters nb (Ob_Og) | Unphased_clusters nb (Ob_Og) | Common clusters nb | Diff exp cluster nb | Total_reads nb (Ob_Og) | Total_phased_reads (Ob_Og) | Total_unphased_reads (Ob_Og) | Annotation                   | Pipeline | Annotated cluster nb |
|--------|-------------|-------|---------------------------|---------|-----------------|--------------------------|------------------|----------------------------|------------------------------|--------------------|---------------------|------------------------|----------------------------|------------------------------|------------------------------|----------|----------------------|
| PH-749 | phasi_NO439 | Chr06 | 4717272-4722023           | 2109    | ND              | 251                      | 4, 2             | No                         | 4, 2                         | 2                  | 4                   | 273, 8                 | 273, 8                     | 0, 0                         | NA                           |          | 0                    |
| PH-750 | phasi_NO440 | Chr06 | 473535-4735606            | 3132    | ND              | 251                      | 6, 5             | No                         | 6, 5                         | 5                  | 4                   | 457, 54                | 457, 54                    | 0, 0                         | NA                           |          | 0                    |
| PH-751 | phasi_NO440 | Chr06 | 4777608-4777859           | 2002    | ND              | 251                      | 8, 7             | No                         | 8, 7                         | 2                  | 3                   | 156, 44                | 156, 44                    | 0, 0                         | NA                           |          | 0                    |
| PH-752 | phasi_NO441 | Chr06 | 4787002-4787253           | 9143    | ND              | 251                      | 3, 2             | No                         | 3, 2                         | 2                  | 2                   | 192, 25                | 192, 25                    | 0, 0                         | NA                           |          | 0                    |
| PH-753 | phasi_NO441 | Chr06 | 4789188-4789449           | 9451    | ND              | 251                      | 1, 1             | No                         | 1, 1                         | 1                  | 1                   | 286, 3                 | 286, 3                     | 0, 0                         | NA                           |          | 0                    |
| PH-754 | phasi_NO442 | Chr06 | 4780714-4790965           | 1265    | ND              | 251                      | 2, 0             | No                         | 2, 0                         | 0                  | 2                   | 27, 0                  | 27, 0                      | 0, 0                         | NA                           |          | 0                    |
| PH-755 | phasi_NO446 | Chr06 | 7791709-7791960           | 3000744 | ND              | 251                      | 3, 2             | No                         | 3, 2                         | 2                  | 50, 41              | 31, 13                 | 19, 28                     | 0, 0                         | RF01058;MIR806;AAAA02032891. |          | 5                    |
| PH-756 | phasi_NO446 | Chr06 | 9453840-9454091           | 1661880 | ND              | 251                      | 3, 0             | No                         | 3, 0                         | 0                  | 0                   | 0                      | 0                          | 0, 0                         | NA                           |          | 0                    |
| PH-757 | phasi_NO461 | Chr06 | 9577636-9577887           | 123545  | ND              | 251                      | 3, 3             | No                         | 3, 3                         | 3                  | 3                   | 417, 63                | 417, 63                    | 0, 0                         | NA                           |          | 0                    |
| PH-760 | phasi_NO463 | Chr06 | 9583382-9583633           | 5495    | ND              | 251                      | 9, 8             | No                         | 9, 8                         | 8                  | 8                   | 419, 78                | 419, 78                    | 0, 0                         | NA                           |          | 0                    |
| PH-761 | phasi_NO467 | Chr06 | 9660026-9660277           | 76363   | ND              | 251                      | 6, 5             | No                         | 6, 5                         | 5                  | 5                   | 1463, 196              | 1463, 196                  | 0, 0                         | NA                           |          | 0                    |
| PH-762 | phasi_NO470 | Chr06 | 9667706-9667957           | 7429    | ND              | 251                      | 3, 3             | No                         | 3, 3                         | 2                  | 2                   | 157, 9                 | 157, 9                     | 0, 0                         | NA                           |          | 0                    |
| PH-763 | phasi_NO471 | Chr06 | 9669236-9669487           | 1279    | ND              | 251                      | 5, 2             | No                         | 5, 2                         | 4                  | 4                   | 120, 10                | 120, 10                    | 0, 0                         | LOC_Os06g29510               |          | 1                    |
| PH-764 | phasi_NO473 | Chr06 | 9676418-9676669           | 6931    | ND              | 251                      | 3, 3             | No                         | 3, 3                         | 2                  | 2                   | 127, 16                | 127, 16                    | 0, 0                         | Rep_Loc_Os02g33370           |          | 1                    |
| PH-765 | phasi_NO473 | Chr06 | 9677357-9677608           | 688     | ND              | 251                      | 4, 0             | No                         | 4, 0                         | 4                  | 4                   | 84, 0                  | 84, 0                      | 0, 0                         | NA                           |          | 0                    |
| PH-766 | phasi_NO477 | Chr06 | 9679446-9679697           | 1838    | ND              | 251                      | 3, 3             | No                         | 3, 3                         | 3                  | 3                   | 301, 50                | 301, 50                    | 0, 0                         | NA                           |          | 0                    |
| PH-767 | -           | Chr06 | 9686478-9686729           | 6781    | ND              | 251                      | 6, 6             | No                         | 6, 6                         | 5                  | 5                   | 205, 39                | 205, 39                    | 0, 0                         | NA                           |          | 0                    |
| PH-768 | -           | Chr06 | 9690805-9691056           | 4076    | ND              | 251                      | 3, 2             | No                         | 3, 2                         | 2                  | 2                   | 112, 16                | 112, 16                    | 0, 0                         | NA                           |          | 0                    |
| PH-769 | -           | Chr06 | 9696515-9696766           | 5459    | ND              | 251                      | 4, 1             | No                         | 4, 1                         | 4                  | 4                   | 222, 219               | 222, 219                   | 0, 0                         | NA                           |          | 0                    |
| PH-668 | phasi_NO138 | Chr06 | 11761286-11761537         | 2064520 | ND              | 251                      | 5, 3             | No                         | 5, 3                         | 2                  | 2                   | 196, 13                | 196, 13                    | 0, 0                         | LOC_Os06g20480.1;LOC_Os06g20 |          | 5                    |
| PH-669 | phasi_NO138 | Chr06 | 11763875-11764126         | 2338    | ND              | 251                      | 5, 4             | No                         | 5, 4                         | 5                  | 5                   | 2198, 215              | 2198, 215                  | 32, 0                        | LOC_Os03g32499               |          | 9                    |
| PH-670 | phasi_NO133 | Chr06 | 11765631-11765882         | 1505    | ND              | 251                      | 8, 7             | No                         | 8, 7                         | 8                  | 8                   | 2827, 733              | 2776, 731                  | 51, 2                        | LOC_Os03g32499               |          | 9                    |
| PH-671 | phasi_NO136 | Chr06 | 11766567-11766818         | 685     | ND              | 251                      | 3, 3             | No                         | 3, 3                         | 3                  | 3                   | 997, 182               | 997, 182                   | 0, 0                         | LOC_Os03g32499               |          | 3                    |
| PH-672 | -           | Chr06 | 11767958-11768209         | 1140    | ND              | 251                      | 3, 2             | No                         | 3, 2                         | 3                  | 3                   | 258, 24                | 0, 0                       | 258, 24                      | LOC_Os03g32499               |          | 4                    |
| PH-673 | -           | Chr06 | 11768604-11768855         | 395     | ND              | 251                      | 1, 1             | No                         | 1, 1                         | 7                  | 9                   | 399, 46                | 272, 30                    | 127, 16                      | LOC_Os03g32499               |          | 7                    |
| PH-674 | phasi_NO305 | Chr06 | 11771084-11771335         | 2229    | ND              | 251                      | 7, 6             | No                         | 7, 6                         | 6                  | 6                   | 1260, 120              | 1138, 114                  | 122, 6                       | LOC_Os03g32499               |          | 7                    |
| PH-675 | phasi_NO138 | Chr06 | 11811127-11811378         | 39792   | ND              | 251                      | 6, 4             | No                         | 6, 4                         | 6                  | 6                   | 230, 15                | 144, 15                    | 86, 0                        | LOC_Os06g20480.1;LOC_Os06g20 |          | 6                    |
| PH-676 | -           | Chr06 | 11813726-11813977         | 2348    | ND              | 251                      | 6, 5             | No                         | 6, 5                         | 6                  | 6                   | 222, 219               | 222, 219                   | 0, 0                         | LOC_Os03g32499               |          | 6                    |
| PH-677 | phasi_NO133 | Chr06 | 11815482-11815733         | 1505    | ND              | 251                      | 8, 7             | No                         | 8, 7                         | 8                  | 5                   | 2827, 733              | 2786, 731                  | 41, 2                        | LOC_Os03g32499               |          | 9                    |
| PH-678 | -           | Chr06 | 11816418-11816669         | 685     | ND              | 251                      | 3, 3             | No                         | 3, 3                         | 3                  | 3                   | 997, 182               | 997, 182                   | 0, 0                         | LOC_Os03g32499               |          | 3                    |
| PH-679 | -           | Chr06 | 11817809-11818060         | 1140    | ND              | 251                      | 4, 3             | No                         | 4, 3                         | 1                  | 1                   | 274, 26                | 12, 5                      | 262, 3                       | LOC_Os03g32499               |          | 9                    |
| PH-680 | -           | Chr06 | 11818475-11818726         | 415     | ND              | 251                      | 1, 1             | No                         | 1, 1                         | 7                  | 9                   | 399, 46                | 187, 23                    | 212, 23                      | LOC_Os03g32499               |          | 7                    |
| PH-681 | phasi_NO305 | Chr06 | 11820955-11821206         | 2229    | ND              | 251                      | 7, 6             | No                         | 7, 6                         | 6                  | 6                   | 1260, 120              | 1162, 114                  | 98, 6                        | LOC_Os03g32499               |          | 7                    |
| PH-682 | phasi_NO489 | Chr06 | 12043130-12043381         | 21324   | ND              | 251                      | 4, 4             | No                         | 4, 4                         | 4                  | 4                   | 277, 58                | 277, 58                    | 0, 0                         | NA                           |          | 0                    |
| PH-683 | -           | Chr06 | 12050090-12050341         | 6709    | ND              | 251                      | 6, 5             | No                         | 6, 5                         | 5                  | 5                   | 1431, 155              | 1431, 155                  | 0, 0                         | NA                           |          | 0                    |
| PH-684 | phasi_NO496 | Chr06 | 13096361-13096612         | 1046020 | ND              | 251                      | 3, 3             | No                         | 3, 3                         | 2                  | 2                   | 49, 12                 | 49, 12                     | 0, 0                         | NA                           |          | 0                    |
| PH-685 | phasi_NO491 | Chr06 | 16916236-16916487         | 1019    | ND              | 251                      | 3, 2             | No                         | 3, 2                         | 3                  | 3                   | 169, 16                | 128, 6                     | 28, 0                        | LOC_Os06g29490.2             |          | 5                    |
| PH-687 | phasi_NO494 | Chr06 | 16973406-16973657         | 56780   | ND              | 251                      | 6, 2             | No                         | 6, 2                         | 4                  | 7                   | 530, 30                | 311, 16                    | 219, 14                      | NA                           |          | 0                    |
| PH-688 | phasi_NO496 | Chr06 | 17666256-17666507         | 692669  | ND              | 251                      | 3, 2             | No                         | 3, 2                         | 3                  | 3                   | 118, 11                | 105, 8                     | 11, 3                        | osa-MIR819                   |          | 1                    |
| PH-689 | -           | Chr06 | 17672875-17673126         | 6298    | ND              | 251                      | 3, 2             | No                         | 3, 2                         | 2                  | 2                   | 78, 12                 | 78, 12                     | 0, 0                         | osa-MIR819                   |          | 1                    |
| PH-690 | phasi_NO497 | Chr06 | 17694938-17695189         | 21812   | ND              | 251                      | 6, 5             | No                         | 6, 5                         | 4                  | 4                   | 237, 28                | 237, 28                    | 0, 0                         | NA                           |          | 0                    |
| PH-691 | phasi_NO498 | Chr06 | 17697557-17697808         | 3478    | ND              | 251                      | 3, 2             | No                         | 3, 2                         | 10                 | 10                  | 1337, 174              | 1170, 165                  | 168, 19                      | NA                           |          | 0                    |
| PH-692 | phasi_NO501 | Chr06 | 17754638-17754889         | 56830   | ND              | 251                      | 3, 2             | No                         | 3, 2                         | 2                  | 3                   | 71, 9                  | 32, 0                      | 39, 0                        | LOC_Os01g34080               |          | 1                    |
| PH-693 | phasi_NO502 | Chr06 | 17769213-17769464         | 14324   | ND              | 251                      | 3, 3             | No                         | 3, 3                         | 7                  | 7                   | 367, 17                | 335, 0                     | 32, 17                       | NA                           |          | 0                    |
| PH-694 | phasi_NO503 | Chr06 | 17771673-17771924         | 2424    | ND              | 251                      | 1, 1             | No                         | 1, 1                         | 3                  | 3                   | 1434, 195              | 1434, 195                  | 0, 0                         | LOC_Os06g30680;LOC_Os06g3068 |          | 7                    |
| PH-695 | phasi_NO504 | Chr06 | 17784816-17785067         | 12892   | ND              | 251                      | 3, 2             | No                         | 3, 2                         | 2                  | 3                   | 861, 145               | 861, 145                   | 0, 0                         | NA                           |          | 0                    |
| PH-696 | phasi_NO505 | Chr06 | 17788501-17788752         | 3434    | ND              | 251                      | 6, 0             | No                         | 6, 0                         | 9                  | 9                   | 339, 22                | 190, 0                     | 149, 22                      | NA                           |          | 0                    |
| PH-701 | -           | Chr06 | 23171349-23171600         | 30557   | ND              | 251                      | 4, 4             | No                         | 4, 4                         | 4                  | 4                   | 307, 18                | 307, 18                    | 0, 0                         | NA                           |          | 0                    |
| PH-702 | -           | Chr06 | 23178446-23178697         | 6846    | ND              | 251                      | 3, 2             | No                         | 3, 2                         | 2                  | 3                   | 203, 23                | 203, 23                    | 0, 0                         | NA                           |          | 0                    |
| PH-703 | phasi_NO518 | Chr06 | 23179718-23179969         | 1021    | ND              | 251                      | 4, 3             | No                         | 4, 3                         | 3                  | 3                   | 270, 34                | 58, 2                      | 212, 25                      | NA                           |          | 0                    |
| PH-704 | -           | Chr06 | 24600881-24601132         | 346     | ND              | 251                      | 3, 2             | No                         | 3, 2                         | 3                  | 3                   | 140, 17                | 140, 17                    | 0, 0                         | NA                           |          | 0                    |
| PH-705 | phasi_NO521 | Chr06 | 24602368-24602599         | 1376    | ND              | 251                      | 5, 3             | No                         | 5, 3                         | 7                  | 7                   | 211, 39                | 177, 37                    | 34, 2                        | NA                           |          | 0                    |
| PH-706 | phasi_NO523 | Chr06 | 24608875-24609126         | 6316    | ND              | 251                      | 3, 3             | No                         | 3, 3                         | 4                  | 7                   | 1088, 212              | 1158, 191                  | 210, 21                      | NA                           |          | 0                    |
| PH-707 | phasi_NO524 | Chr06 | 24610783-24611034         | 414     | ND              | 251                      | 4, 1             | No                         | 4, 1                         | 4                  | 4                   | 608, 23                | 608, 23                    | 2, 1                         | NA                           |          | 0                    |
| PH-708 | phasi_NO526 | Chr06 | 24617212-24617463         | 6168    | ND              | 251                      | 6, 3             | No                         | 6, 3                         | 4                  | 5                   | 131, 13                | 125, 8                     | 6, 5                         | NA                           |          | 0                    |
| PH-709 | -           | Chr06 | 24618442-24618693         | 980     | ND              | 251                      | 3, 1             | No                         | 3, 1                         | 2                  | 2                   | 62, 4                  | 62, 4                      | 0, 0                         | NA                           |          | 0                    |
| PH-710 | -           | Chr06 | 24630211-24630462         | 1517    | ND              | 251                      | 5, 4             | No                         | 5, 4                         | 4                  | 4                   | 278, 30                | 197, 18                    | 81, 12                       | NA                           |          | 0                    |
| PH-711 | -           | Chr06 | 24632924-2463325          | 8812    | ND              | 251                      | 3, 2             | No                         | 3, 2                         | 11                 | 11                  | 172, 52                | 58, 10                     | 114, 43                      | NA                           |          | 0                    |
| PH-712 | phasi_NO532 | Chr06 | 24650991-24651242         | 10966   | ND              | 251                      | 10, 10           | No                         | 10, 10                       | 11                 | 11                  | 1181, 241              | 789, 189                   | 392, 52                      | NA                           |          | 0                    |
| PH-713 | phasi_NO533 | Chr06 | 24657180-24657431         | 304     | ND              | 251                      | 8, 7             | No                         | 8, 7                         | 2                  | 2                   | 247, 8                 | 247, 8                     | 0, 0                         | NA                           |          | 0                    |
| PH-714 | phasi_NO535 | Chr06 | 24661231-24661482         | 3800    | ND              | 251                      | 6, 3             | No                         | 6, 3                         | 6                  | 6                   | 363, 38                | 302, 27                    | 61, 11                       | NA                           |          | 0                    |
| PH-990 | phasi_NO536 | Chr06 | 24665303-24665554         | 1821    | ND              | 251                      | 6, 3             | No                         | 6, 3                         | 6                  | 6                   | 351, 48                | 35, 16                     | 316, 32                      | NA                           |          | 0                    |
| PH-715 | phasi_NO537 | Chr06 | 24669250-24669501         | 11388   | ND              | 251                      | 2, 2             | No                         | 2, 2                         | 3                  | 3                   | 450, 75                | 259, 41                    | 191, 31                      | NA                           |          | 0                    |
| PH-716 | phasi_NO538 | Chr06 | 24676851-24677102         | 1648    | ND              | 251                      | 4, 0             | No                         | 4, 0                         | 5                  | 5                   | 188, 0                 | 167, 0                     | 21, 0                        | NA                           |          | 0                    |
| PH-717 | phasi_NO540 | Chr06 | 24682211-24682462         | 1109    | ND              | 251                      | 1, 1             | No                         | 1, 1                         | 4                  | 4                   | 65, 14                 | 65, 14                     | 0, 0                         | NA                           |          | 0                    |
| PH-718 | -           | Chr06 | 24762719-24762970         | 80257   | ND              | 251                      | 3, 3             | No                         | 3, 3                         | 3                  | 3                   | 134, 12                | 134, 12                    | 0, 0                         | NA                           |          | 0                    |
| PH-719 | phasi_NO551 | Chr06 | 24772065-24772316         | 9095    | ND              | 251                      | 8, 6             | No                         | 8, 6                         | 11                 | 11                  | 804, 58                | 431, 42                    | 373, 16                      | NA                           |          | 0                    |
| PH-720 | phasi_NO550 | Chr06 | 24774379-24774630         | 2863    | ND              | 251                      | 7, 7             | No                         | 7, 7                         | 6                  | 6                   | 683, 87                | 643, 85                    | 40, 2                        | NA                           |          | 0                    |
| PH-721 | -           | Chr06 | 24784675-24784926         | 10045   | ND              | 251                      | 7, 6             | No                         | 7, 6                         | 7                  | 7                   | 945, 142               | 910, 138                   | 35, 4                        | NA                           |          | 0                    |
| PH-722 | -           | Chr06 | 27833738-27833989         | 3048812 | ND              | 251                      | 4, 4             | No                         | 4, 4                         | 10                 | 10                  | 148, 127               | 67, 48                     | 81, 79                       | osa-MIR806;RF01058;MIR806;AA |          | 10                   |
| PH-723 | phasi_NO557 | Chr06 | 28293560-28293811         | 495971  | ND              | 251                      | 6, 5             | No                         | 6, 5                         | 5                  | 6                   | 722, 97                | 707, 97                    | 15, 0                        | NA                           |          | 0                    |
| PH-724 | phasi_NO558 | Chr06 | 28295251-28295502         | 1440    | ND              | 251                      | 6, 6             | No                         | 6, 6                         | 5                  | 5                   | 471, 64                | 437, 59                    | 34, 5                        | NA                           |          | 0                    |
| PH-725 | phasi_NO562 | Chr06 | 28299407-28299658         | 3905    | ND              | 251                      | 3, 2             | No                         | 3, 2                         | 3                  | 3                   | 182, 25                | 171, 22                    | 11, 3                        | NA                           |          | 0                    |
| PH-726 | phasi_NO563 |       |                           |         |                 |                          |                  |                            |                              |                    |                     |                        |                            |                              |                              |          |                      |

| Name    | Alt_name    | Chr   | Positions (sRNAworkbench) | Dist_w/previous (bp) | MEME motif position (bp) | Size_w/MEME (bp) | Phased clusters nb (Ob_Og) | Unphased_clusters nb (Ob_Og) | Common clusters nb | Diff exp cluster nb | Total_reads nb (Ob_Og) | Total phased_reads (Ob_Og) | Total unphased_reads (Ob_Og) | Annotation | Pipeline  | Annotated cluster nb |    |
|---------|-------------|-------|---------------------------|----------------------|--------------------------|------------------|----------------------------|------------------------------|--------------------|---------------------|------------------------|----------------------------|------------------------------|------------|-----------|----------------------|----|
| PH-811  |             | Chr07 | 6975919-6976170           | 32566                | ND                       | 251              | 3, 2                       | 1, 0                         | 2                  | 3                   | 100                    | 60                         | 20                           | NA         |           | 0                    |    |
| PH-812  | phasi_NO612 | Chr07 | 6983096-6983147           | 62626                | -53                      | 304              | 5, 3                       | No                           | 3                  | 4                   | 638                    | 41                         | 0                            | NA         |           | 0                    |    |
| PH-813  |             | Chr07 | 7032102-7032353           | 48755                | -202                     | 453              | 4, 2                       | 13, 13                       | 15                 | 4                   | 317                    | 217                        | 81                           | 8          | 236, 209  | 13                   |    |
| PH-814  | phasi_NO617 | Chr07 | 7037715-7037966           | 5362                 | -157                     | 408              | 5, 4                       | 4, 2                         | 6                  | 7                   | 1911                   | 208                        | 295                          | 44         | 1616, 164 | 10                   |    |
| PH-815  |             | Chr07 | 7064406-7064657           | 13440                | -137                     | 388              | 3, 0                       | No                           | 4                  | 3                   | 702                    | 0                          | 37                           | 0          | NA        | 0                    |    |
| PH-816  | phasi_NO619 | Chr07 | 7069679-7069930           | 8022                 | -116                     | 367              | 4, 2                       | 1, 0                         | 2                  | 5                   | 353                    | 23                         | 337                          | 23         | 16, 0     | 0                    |    |
| PH-817  | phasi_NO620 | Chr07 | 7071798-7072049           | 1808                 | -53                      | 304              | 6, 3                       | 2, 2                         | 7                  | 7                   | 155                    | 15                         | 94                           | 6          | 61, 7     | 0                    |    |
| PH-818  | phasi_NO621 | Chr07 | 7073658-7073909           | 609                  | -96                      | 304              | 6, 4                       | No                           | 3                  | 3                   | 346                    | 0                          | 260                          | 31         | 0, 0      | 0                    |    |
| PH-819  |             | Chr07 | 8560589-8560840           | 1486680              | -172                     | 283              | 5, 4                       | 2, 1                         | 5                  | 7                   | 1099                   | 85                         | 458                          | 41         | 641, 44   | 0                    |    |
| PH-820  | phasi_NO624 | Chr07 | 8601105-8601356           | 40265                | -39                      | 430              | 5, 4                       | 2, 1                         | 5                  | 5                   | 259                    | 64                         | 210                          | 58         | 49, 6     | 4                    |    |
| PH-821  |             | Chr07 | 865414-8654395            | 52758                | -95                      | 346              | 3, 2                       | 1, 1                         | 4                  | 4                   | 132                    | 10                         | 85                           | 6          | 47, 4     | 0                    |    |
| PH-822  |             | Chr07 | 8663368-8663619           | 9003                 | -32                      | 283              | 6, 4                       | No                           | 4                  | 5                   | 107                    | 11                         | 107                          | 11         | 0, 0      | 0                    |    |
| PH-1008 |             | Chr07 | 8677743-8677994           | 14124                | ND                       | 251              | 3, 3                       | 2, 0                         | 3                  | 3                   | 186                    | 17                         | 152                          | 17         | 24, 0     | 0                    |    |
| PH-823  | phasi_NO629 | Chr07 | 8715913-8716164           | 37919                | -116                     | 367              | 6, 5                       | 2, 2                         | 7                  | 7                   | 522                    | 71                         | 217                          | 29         | 305, 42   | 0                    |    |
| PH-824  |             | Chr07 | 9032237-9032488           | 316073               | -53                      | 304              | 5, 2                       | No                           | 2                  | 5                   | 118                    | 9                          | 118                          | 9          | 0, 0      | 0                    |    |
| PH-825  |             | Chr07 | 9068833-9069084           | 35345                | -53                      | 304              | 4, 4                       | No                           | 4                  | 2                   | 126                    | 14                         | 126                          | 14         | 0, 0      | 0                    |    |
| PH-826  | phasi_NO633 | Chr07 | 9444382-9444633           | 375298               | ND                       | 251              | 4, 4                       | No                           | 4                  | 3                   | 405                    | 39                         | 405                          | 39         | 0, 0      | 0                    |    |
| PH-771  |             | Chr07 | 1367809-13678310          | 4233426              | ND                       | 251              | 2, 2                       | No                           | 2                  | 2                   | 108                    | 11                         | 108                          | 11         | 0, 0      | 0                    |    |
| PH-772  |             | Chr07 | 13716857-13717108         | 38547                | -116                     | 367              | 3, 3                       | No                           | 3                  | 3                   | 139                    | 11                         | 139                          | 11         | 0, 0      | 0                    |    |
| PH-773  | phasi_NO641 | Chr07 | 13735046-13735297         | 17938                | -95                      | 346              | 3, 3                       | No                           | 2                  | 2                   | 86                     | 21                         | 86                           | 21         | 0, 0      | 0                    |    |
| PH-774  | phasi_NO644 | Chr07 | 1486734-14867985          | 1132437              | ND                       | 251              | 3, 2                       | 2, 0                         | 4                  | 0                   | 29                     | 3                          | 21                           | 27         | 8, 6      | 3                    |    |
| PH-775  | phasi_NO651 | Chr07 | 15007694-15007945         | 139709               | -32                      | 283              | 6, 6                       | 4, 0                         | 10                 | 10                  | 493                    | 106                        | 423                          | 106        | 70, 0     | 0                    |    |
| PH-776  | phasi_NO647 | Chr07 | 15967651-15967902         | 959706               | ND                       | 251              | 1, 1                       | 3, 3                         | 9                  | 8                   | 2459                   | 321                        | 2417                         | 313        | 42, 8     | 1                    |    |
| PH-777  |             | Chr07 | 16039343-16039594         | 71441                | -32                      | 283              | 4, 3                       | No                           | 3                  | 3                   | 79                     | 10                         | 79                           | 10         | 0, 0      | 0                    |    |
| PH-778  | phasi_NO649 | Chr07 | 16042379-16042630         | 2785                 | -74                      | 325              | 5, 4                       | 1, 0                         | 4                  | 5                   | 158                    | 29                         | 138                          | 29         | 20, 0     | 0                    |    |
| PH-779  |             | Chr07 | 16046390-16046641         | 3760                 | -95                      | 346              | 8, 7                       | 1, 1                         | 8                  | 4                   | 2117                   | 200                        | 2102                         | 197        | 15, 3     | 0                    |    |
| PH-780  | phasi_NO652 | Chr07 | 16115091-16115342         | 68450                | -96                      | 347              | 5, 3                       | 2, 2                         | 5                  | 5                   | 491                    | 78                         | 312                          | 48         | 179, 30   | 0                    |    |
| PH-781  |             | Chr07 | 17296961-17297212         | 1181619              | ND                       | 251              | 3, 1                       | No                           | 1                  | 1                   | 335                    | 35                         | 335                          | 35         | 0, 0      | 0                    |    |
| PH-782  |             | Chr07 | 17336349-17336600         | 39137                | ND                       | 251              | 3, 3                       | 3, 3                         | 3                  | 3                   | 73                     | 14                         | 73                           | 14         | 0, 0      | 0                    |    |
| PH-783  | phasi_NO655 | Chr07 | 1740076-1741127           | 4276                 | ND                       | 251              | 5, 4                       | 1, 0                         | 4                  | 5                   | 151                    | 18                         | 128                          | 18         | 23, 0     | 0                    |    |
| PH-784  |             | Chr07 | 2897104-2897355           | 1235977              | ND                       | 251              | 3, 1                       | No                           | 15                 | 10                  | 290                    | 12                         | 1155                         | 1391       | 0, 0      | 0                    |    |
| PH-827  |             | Chr08 | 1002-1253                 | ..                   | ..                       | 251              | 20, 20                     | 10, 10                       | 3                  | 1                   | 1465                   | 1768                       | 972                          | 1139       | 493       | 629                  | 35 |
| PH-828  |             | Chr08 | 1314-1565                 | 61                   | ND                       | 251              | 12, 12                     | 5, 5                         | 17                 | 0                   | 1335                   | 1561                       | 450                          | 548        | 885       | 1013                 | 17 |
| PH-852  | phasi_NO657 | Chr08 | 2440008-2440259           | 438443               | ND                       | 251              | 3, 3                       | 3, 0                         | 3                  | 3                   | 335                    | 38                         | 335                          | 38         | 0, 0      | 0                    |    |
| PH-858  |             | Chr08 | 2441706-2441957           | 1447                 | -74                      | 325              | 5, 4                       | No                           | 2                  | 4                   | 230                    | 30                         | 230                          | 30         | 0, 0      | 0                    |    |
| PH-854  | phasi_NO659 | Chr08 | 2456738-2456989           | 14781                | -74                      | 325              | 4, 4                       | No                           | 4                  | 4                   | 216                    | 27                         | 216                          | 27         | 0, 0      | 0                    |    |
| PH-856  |             | Chr08 | 2460296-2460547           | 6497                 | -74                      | 325              | 3, 2                       | 1, 0                         | 4                  | 6                   | 274                    | 50                         | 44                           | 4          | 276       | 44                   | 0  |
| PH-857  |             | Chr08 | 2462128-2461469           | 671                  | -74                      | 325              | 3, 2                       | 1, 0                         | 3                  | 3                   | 70                     | 8                          | 51                           | 8          | 19, 0     | 0                    |    |
| PH-857  |             | Chr08 | 2462664-2462715           | 651                  | ND                       | 251              | 4, 4                       | No                           | 4                  | 4                   | 58                     | 4                          | 58                           | 4          | 0, 0      | 0                    |    |
| PH-858  |             | Chr08 | 2672302-2672553           | 209587               | ND                       | 251              | 4, 2                       | 1, 1                         | 3                  | 5                   | 155                    | 15                         | 127                          | 12         | 28, 3     | 0                    |    |
| PH-859  | phasi_NO670 | Chr08 | 2673785-2674036           | 1232                 | -32                      | 283              | 5, 3                       | 1, 0                         | 3                  | 6                   | 450                    | 74                         | 440                          | 74         | 10, 0     | 0                    |    |
| PH-860  | phasi_NO677 | Chr08 | 2693471-2693722           | 30862                | ND                       | 251              | 103, 9                     | No                           | 0                  | 0                   | 103                    | 9                          | 103                          | 9          | 0, 0      | 0                    |    |
| PH-861  | phasi_NO678 | Chr08 | 5732758-5733009           | 3039036              | ND                       | 251              | 3, 2                       | No                           | 2                  | 3                   | 182                    | 21                         | 182                          | 21         | 0, 0      | 0                    |    |
| PH-862  | phasi_NO679 | Chr08 | 5743703-5743954           | 10694                | ND                       | 251              | 7, 3                       | 3, 2                         | 7                  | 7                   | 1486                   | 116                        | 1486                         | 116        | 0, 0      | 0                    |    |
| PH-863  |             | Chr08 | 7640446-7640697           | 3039036              | ND                       | 251              | 2, 2                       | 3, 3                         | 6                  | 6                   | 132                    | 13                         | 22                           | 29         | 0, 0      | 0                    |    |
| PH-829  |             | Chr08 | 16727595-16727846         | 9086916              | -221                     | 426              | 4, 1                       | 2, 1                         | 6                  | 4                   | 130                    | 6                          | 81                           | 4          | 49, 2     | 0                    |    |
| PH-830  | phasi_NO687 | Chr08 | 16735923-16736174         | 8077                 | ND                       | 251              | 7, 6                       | 4, 4                         | 6                  | 4                   | 795                    | 136                        | 795                          | 136        | 0, 0      | 0                    |    |
| PH-831  |             | Chr08 | 17057956-1706007          | 30862                | -116                     | 367              | 10, 7                      | No                           | 6                  | 6                   | 62                     | 0                          | 62                           | 0          | 0, 0      | 0                    |    |
| PH-832  | phasi_NO692 | Chr08 | 17084824-17085075         | 17517                | -205                     | 456              | 3, 2                       | 4, 3                         | 5                  | 6                   | 160                    | 18                         | 58                           | 7          | 102, 11   | 2                    |    |
| PH-833  |             | Chr08 | 17109669-17109920         | 24594                | ND                       | 251              | 6, 5                       | No                           | 5                  | 4                   | 979                    | 129                        | 979                          | 129        | 0, 0      | 0                    |    |
| PH-834  | phasi_NO702 | Chr08 | 17161312-17161563         | 30862                | -32                      | 283              | 6, 6                       | No                           | 6                  | 6                   | 496                    | 9                          | 496                          | 9          | 0, 0      | 0                    |    |
| PH-835  | phasi_NO706 | Chr08 | 17178006-17178257         | 16443                | -74                      | 325              | 3, 3                       | No                           | 3                  | 3                   | 1348                   | 10                         | 1348                         | 10         | 0, 0      | 0                    |    |
| PH-836  |             | Chr08 | 18585503-18585854         | 1407346              | -203                     | 454              | 5, 4                       | 1, 1                         | 5                  | 5                   | 166                    | 25                         | 156                          | 18         | 10, 7     | 0                    |    |
| PH-837  | phasi_NO710 | Chr08 | 18587993-18588244         | 444                  | ND                       | 251              | 4, 4                       | 1, 0                         | 4                  | 6                   | 456                    | 24                         | 456                          | 24         | 0, 0      | 0                    |    |
| PH-838  | phasi_NO711 | Chr08 | 18606747-18606998         | 18503                | -53                      | 304              | 4, 2                       | 4, 2                         | 6                  | 6                   | 457                    | 79                         | 129                          | 29         | 328, 50   | 0                    |    |
| PH-839  | phasi_NO712 | Chr08 | 18613910-18614161         | 6912                 | -203                     | 454              | 3, 2                       | 1, 1                         | 4                  | 4                   | 788                    | 160                        | 545                          | 119        | 243, 41   | 0                    |    |
| PH-840  |             | Chr08 | 18615336-18615787         | 7375                 | -74                      | 325              | 5, 5                       | 3, 2                         | 5                  | 7                   | 604                    | 34                         | 83                           | 3          | 121, 13   | 0                    |    |
| PH-841  |             | Chr08 | 18715329-18715580         | 99542                | -419                     | 670              | 3, 1                       | No                           | 1                  | 3                   | 90                     | 4                          | 90                           | 4          | 0, 0      | 0                    |    |
| PH-842  | phasi_NO715 | Chr08 | 18719611-18719862         | 4031                 | -116                     | 367              | 3, 2                       | 1, 1                         | 3                  | 3                   | 60                     | 97                         | 64                           | 95         | 26, 2     | 0                    |    |
| PH-843  | phasi_NO717 | Chr08 | 18780330-18780781         | 10668                | ND                       | 251              | 3, 3                       | 0, 0                         | 2                  | 2                   | 15                     | 0                          | 49                           | 15         | 0, 0      | 0                    |    |
| PH-844  | phasi_NO719 | Chr08 | 18819941-18821092         | 39160                | ND                       | 251              | 3, 3                       | 1, 1                         | 3                  | 11                  | 91                     | 14                         | 91                           | 14         | 0, 0      | 0                    |    |
| PH-845  |             | Chr08 | 1882731-18827962          | 7539                 | ND                       | 251              | 2, 0                       | No                           | 0                  | 11                  | 145                    | 151                        | 112                          | 151        | 23, 0     | 0                    |    |
| PH-846  | phasi_NO723 | Chr08 | 18834839-18835090         | 6857                 | -53                      | 304              | 6, 4                       | 1, 1                         | 6                  | 11                  | 160                    | 22                         | 140                          | 17         | 20, 5     | 12                   |    |
| PH-847  |             | Chr08 | 18848176-18848427         | 13086                | ND                       | 251              | 4, 4                       | 4, 4                         | 4                  | 4                   | 383                    | 36                         | 383                          | 36         | 0, 0      | 0                    |    |
| PH-848  |             | Chr08 | 1892362-1892413           | 8935                 | ND                       | 251              | 5, 5                       | No                           | 5                  | 4                   | 282                    | 24                         | 282                          | 24         | 0, 0      | 0                    |    |
| PH-849  |             | Chr08 | 18944781-18945032         | 10168                | ND                       | 251              | 7, 6                       | 4, 4                         | 6                  | 4                   | 217                    | 49                         | 217                          | 49         | 0, 0      | 0                    |    |
| PH-850  | phasi_NO725 | Chr08 | 18949275-18949526         | 4243                 | ND                       | 251              | 4, 3                       | 3, 3                         | 3                  | 3                   | 167                    | 44                         | 167                          | 44         | 0, 0      | 0                    |    |
| PH-851  | phasi_NO726 | Chr08 | 18951994-18952245         | 2468                 | ND                       | 251              | 6, 6                       | No                           | 6                  | 3                   | 473                    | 116                        | 473                          | 116        | 0, 0      | 0                    |    |
| PH-866  |             | Chr09 | 6627774-6628025           | ..                   | ..                       | 251              | 1, 1                       | 2, 2                         | 2                  | 2                   | 42                     | 6                          | 34                           | 3          | 8, 3      | 0                    |    |
| PH-867  |             | Chr09 | 6630076-6630327           | 2051                 | ND                       | 251              | 4, 3                       | 4, 4                         | 4                  | 4                   | 95                     | 7                          | 95                           | 7          | 0, 0      | 0                    |    |
| PH-868  | phasi_NO731 | Chr09 | 6634215-6634466           | 3088                 | ND                       | 251              | 10, 7                      | No                           | 7                  | 8                   | 296                    | 34                         | 261                          | 34         | 35, 0     | 0                    |    |
| PH-869  | phasi_NO727 | Chr09 | 6656392-6656643           | 21926                | ND                       | 251              | 7, 4                       | No                           | 4                  | 6                   | 249                    | 60                         | 249                          | 60         | 0, 0      | 0                    |    |
| PH-870  |             | Chr09 | 6657697-6657948           | 1054                 | ND                       | 251              | 4, 4                       | 1, 1                         | 2                  | 2                   | 733                    | 198                        | 691                          | 194        | 42, 4     | 4                    |    |
| PH-871  |             | Chr09 | 6661605-6661856           | 3057                 | ND                       | 251              | 3, 3                       | No                           | 4                  | 5                   | 101                    | 26                         | 101                          | 26         | 0, 0      | 0                    |    |
| PH-872  | phasi_NO732 | Chr09 | 6678654-6678905           | 16798                | ND                       | 251              | 2, 2                       | No                           | 2                  | 2                   | 41                     | 8                          | 41                           | 8          | 0, 0      | 0                    |    |
| PH-873  | phasi_NO733 | Chr09 | 6712656-6712907           | 33751                | 431                      | 682              | 7, 3                       | 3, 0                         | 10                 | 2                   | 289                    | 23                         | 250                          | 23         | 39, 0     | 0                    |    |
| PH-874  | phasi_NO735 | Chr09 | 6718272-6718523           | 5365                 | ND                       | 251              | 0                          | No                           | 4                  | 4                   | 73                     | 0                          | 73                           | 0          | 0, 0      | 0                    |    |
| PH-875  |             | Chr09 | 6740133-6740384           | 21610                | ND                       | 251              | 4, 2                       | 4, 2                         | 2                  | 4                   | 316                    | 22                         | 316                          | 22         | 0, 0      | 0                    |    |
| PH-876  |             | Chr09 | 6789936-6799187           | 58552                | ND                       | 251              | 6, 5                       | No                           | 3                  | 3                   | 438                    | 78                         | 438                          | 78         | 0, 0      | 0                    |    |
| PH-877  |             | Chr09 | 6824222-6824473           | 23035                | ND                       | 251              | 4, 4                       | 5, 4                         | 5                  | 5                   | 161                    | 26                         | 161                          | 26         | 0, 0      | 0                    |    |
| PH-878  |             | Chr09 | 6928683-6928934           | 104210               | ND                       | 251              | 3, 2                       | 1, 1                         | 3                  | 3                   | 1521                   | 118                        | 1511                         | 116        | 10, 2     | 4                    |    |
| PH-879  |             | Chr09 | 8602257-8602508</         |                      |                          |                  |                            |                              |                    |                     |                        |                            |                              |            |           |                      |    |

| Name   | Alt_name    | Chr   | Positions (sRNAworkbench) | Dist_w/previous (bp) | MEME motif position (bp) | Size_w/MEME (bp) | Phased clusters nb (Ob_Og) | Unphased_clusters_nb (Ob_Og) | Common clusters nb | Diff exp cluster nb | Total_reads nb (Ob_Og) | Total phased_reads (Ob_Og) | Total unphased_reads (Ob_Og)  | Annotation_Pipeline | Annotated cluster nb |
|--------|-------------|-------|---------------------------|----------------------|--------------------------|------------------|----------------------------|------------------------------|--------------------|---------------------|------------------------|----------------------------|-------------------------------|---------------------|----------------------|
| PH-38  |             | Chr10 | 14074622-14074873         | 3084                 | ND                       | 251              | 5,3                        | 3,2                          | 5                  | 7                   | 287,22                 | 97,14                      | 190,8                         | NA                  | 0                    |
| PH-39  | phasi_NO82  | Chr10 | 14107994-14108245         | 3121                 | ND                       | 251              | 1,0                        | 4,1                          | 5                  | 282,41              | 215,4                  | 17,0                       | NA                            | 0                   |                      |
| PH-40  |             | Chr10 | 14121873-14122124         | 13628                | ND                       | 251              | 4,1                        | 1,0                          | 1                  | 5                   | 162,2                  | 139,2                      | 23,0                          | NA                  | 0                    |
| PH-41  |             | Chr10 | 14125305-14125556         | 3181                 | ND                       | 251              | 3,2                        | 2,2                          | 2                  | 98,4                | 98,4                   | 0,0                        | Rep_LOC_Os10g26870            | 2                   |                      |
| PH-42  |             | Chr10 | 14139026-14139277         | 13470                | ND                       | 251              | 1,0                        | 1,0                          | 1                  | 2,1                 | 9,0                    | 7,0                        | 2,0                           | NA                  | 0                    |
| PH-43  |             | Chr10 | 14141814-14142065         | 2537                 | ND                       | 251              | 6,5                        | 2,1                          | 5                  | 199,34              | 139,30                 | 60,4                       | LOC_Os10g26890.1,LOC_Os10g26  | 8                   |                      |
| PH-44  | phasi_NO334 | Chr10 | 14147770-14148021         | 5705                 | ND                       | 251              | 4,2                        | 3,2                          | 3                  | 172,7               | 172,7                  | 0,0                        | NA                            | 0                   |                      |
| PH-45  |             | Chr10 | 14191499-14191741         | 43469                | ND                       | 251              | 3,3                        | 3,0                          | 3                  | 50,3                | 50,3                   | 0,0                        | NA                            | 0                   |                      |
| PH-46  |             | Chr10 | 14193352-14193603         | 1611                 | ND                       | 251              | 6,4                        | 4,0                          | 4                  | 110,15              | 110,15                 | 0,0                        | LOC_Os01g54080                | 1                   |                      |
| PH-47  |             | Chr10 | 14208193-14208444         | 14590                | ND                       | 251              | 7,6                        | 2,1                          | 6                  | 1752,123            | 1871,120               | 81,3                       | NA                            | 0                   |                      |
| PH-48  | phasi_NO796 | Chr10 | 14219014-14219265         | 10570                | ND                       | 251              | 2,2                        | 2,0                          | 2                  | 58,9                | 58,9                   | 0,0                        | NA                            | 0                   |                      |
| PH-49  |             | Chr10 | 14220262-14220513         | 997                  | ND                       | 251              | 3,2                        | 2,0                          | 2                  | 131,22              | 131,22                 | 0,0                        | NA                            | 0                   |                      |
| PH-50  |             | Chr10 | 14227481-14227732         | 6968                 | ND                       | 251              | 5,3                        | 3,0                          | 3                  | 310,29              | 310,29                 | 0,0                        | LOC_Os09g02010                | 1                   |                      |
| PH-51  |             | Chr10 | 16607196-16607447         | 2379464              | ND                       | 251              | 4,4                        | 9,9                          | 13                 | 320,309             | 82,76                  | 238,226                    | osa-MIR819,osa-MR806,RF01058, | 13                  |                      |
| PH-52  |             | Chr10 | 18732260-18732511         | 2124813              | ND                       | 251              | 3,3                        | 3,3                          | 6                  | 92,84               | 16,24                  | 76,60                      | Rep_LOC_Os09g19670,Rep_LOC_C  | 6                   |                      |
| PH-53  |             | Chr10 | 20743370-20743621         | 2011059              | ND                       | 459              | 2,2                        | 3,3                          | 5                  | 110,86              | 20,18                  | 90,68                      | Rep_Os15g170050.1,Rep_LOC_C   | 5                   |                      |
| PH-73  |             | Chr11 | 1657240-1657491           | ND                   | 251                      | 3,3              | 2,2                        | 1,1                          | 0                  | 25,43               | 17,37                  | 8,6                        | Rep_LOC_Os12g31040,Rep_LOC_C  | 3                   |                      |
| PH-148 | phasi_NO799 | Chr11 | 3322065-3322316           | 1664574              | ND                       | 251              | 10,9                       | 2,1                          | 10                 | 4923,575            | 4872,573               | 51,2                       | NA                            | 0                   |                      |
| PH-149 | phasi_NO800 | Chr11 | 7813071-7813322           | 4900755              | ND                       | 251              | 4,4                        | 1,1                          | 5                  | 508,111             | 431,93                 | 77,18                      | NA                            | 0                   |                      |
| PH-150 | phasi_NO804 | Chr11 | 9201226-9201477           | 1387904              | ND                       | 251              | 3,3                        | 2,0                          | 3                  | 81,7                | 81,7                   | 0,0                        | NA                            | 0                   |                      |
| PH-151 |             | Chr11 | 9238574-9238825           | 37097                | ND                       | 251              | 5,4                        | 4,0                          | 5                  | 495,33              | 495,33                 | 0,0                        | NA                            | 0                   |                      |
| PH-152 | phasi_NO807 | Chr11 | 9292531-9292782           | 53706                | ND                       | 251              | 3,3                        | 3,0                          | 4                  | 614,74              | 614,74                 | 0,0                        | NA                            | 0                   |                      |
| PH-153 |             | Chr11 | 9295651-9295902           | 2869                 | ND                       | 251              | 5,4                        | 4,0                          | 4                  | 144,14              | 144,14                 | 0,0                        | NA                            | 0                   |                      |
| PH-154 | phasi_NO810 | Chr11 | 9332243-9332494           | 36341                | ND                       | 251              | 5,4                        | 4,0                          | 5                  | 221,11              | 221,11                 | 0,0                        | NA                            | 0                   |                      |
| PH-155 | phasi_NO811 | Chr11 | 9449014-9449265           | 112520               | ND                       | 251              | 4,1                        | 2,1                          | 2                  | 148,56              | 102,3                  | 46,53                      | osa-MIR819                    | 2                   |                      |
| PH-156 |             | Chr11 | 9447125-9447376           | 1860                 | ND                       | 251              | 3,2                        | 2,0                          | 4                  | 168,10              | 168,10                 | 0,0                        | NA                            | 0                   |                      |
| PH-157 | phasi_NO812 | Chr11 | 9449872-9450123           | 2496                 | ND                       | 472              | 6,2                        | 5,2                          | 4                  | 504,19              | 229,7                  | 275,12                     | NA                            | 0                   |                      |
| PH-158 |             | Chr11 | 9451147-9451398           | 1024                 | ND                       | 169              | 3,0                        | 1,1                          | 4                  | 299,3               | 299,0                  | 30,3                       | LOC_Os07g44860.1              | 0                   |                      |
| PH-159 |             | Chr11 | 9459724-9459975           | 8326                 | ND                       | 304              | 6,5                        | 4,5                          | 5                  | 445,27              | 434,27                 | 11,0                       | NA                            | 0                   |                      |
| PH-160 |             | Chr11 | 9570358-9570609           | 110383               | ND                       | 251              | 4,2                        | 2,0                          | 3                  | 83,6                | 83,6                   | 0,0                        | NA                            | 0                   |                      |
| PH-161 |             | Chr11 | 9578718-9578969           | 9148                 | ND                       | 251              | 3,3                        | 2,2                          | 2                  | 92,11               | 92,11                  | 0,0                        | osa-MIR5527                   | 1                   |                      |
| PH-162 |             | Chr11 | 9589947-9590198           | 10978                | ND                       | 251              | 2,1                        | 2,0                          | 1                  | 50,7                | 34,7                   | 16,0                       | osa-MIR5527                   | 1                   |                      |
| PH-163 | phasi_NO818 | Chr11 | 9839933-9839184           | 245735               | ND                       | 251              | 4,2                        | 1,1                          | 5                  | 553,52              | 202,20                 | 351,32                     | NA                            | 0                   |                      |
| PH-164 |             | Chr11 | 9849876-9849127           | 8101                 | ND                       | 251              | 6,6                        | 3,0                          | 6                  | 188,17              | 188,17                 | 0,0                        | NA                            | 0                   |                      |
| PH-165 |             | Chr11 | 9851977-9852228           | 5850                 | ND                       | 251              | 3,2                        | 2,0                          | 3                  | 299,8               | 299,8                  | 0,0                        | LOC_Os11g17650                | 2                   |                      |
| PH-166 |             | Chr11 | 9858435-9858686           | 6207                 | ND                       | 251              | 3,3                        | 3,0                          | 3                  | 246,36              | 246,36                 | 0,0                        | NA                            | 0                   |                      |
| PH-167 |             | Chr11 | 9933415-9933666           | 4729                 | ND                       | 251              | 3,2                        | 2,0                          | 2                  | 131,492             | 131,492                | 0,0                        | NA                            | 0                   |                      |
| PH-168 |             | Chr11 | 9936588-9936839           | 2922                 | ND                       | 251              | 3,0                        | 2,0                          | 0                  | 43,0                | 43,0                   | 0,0                        | NA                            | 0                   |                      |
| PH-169 |             | Chr11 | 9940967-9941218           | 22949                | ND                       | 251              | 3,0                        | 2,0                          | 1                  | 96,2                | 96,2                   | 0,0                        | NA                            | 0                   |                      |
| PH-170 |             | Chr11 | 9964167-9964418           | 22949                | ND                       | 251              | 3,0                        | 2,0                          | 3                  | 76,0                | 76,0                   | 0,0                        | NA                            | 0                   |                      |
| PH-171 |             | Chr11 | 10007254-10007505         | 42836                | ND                       | 251              | 3,0                        | 3,0                          | 3                  | 118,0               | 118,0                  | 0,0                        | NA                            | 0                   |                      |
| PH-172 |             | Chr11 | 10028547-10028798         | 2511                 | ND                       | 251              | 3,2                        | 2,0                          | 1                  | 73,4                | 73,4                   | 0,0                        | NA                            | 0                   |                      |
| PH-173 |             | Chr11 | 15379085-15379336         | 5350287              | ND                       | 388              | 4,3                        | 1,1                          | 4                  | 302,16              | 296,10                 | 6,6                        | RF01062,MIR812,ACV01019908,   | 1                   |                      |
| PH-174 |             | Chr11 | 15763480-15763731         | 384144               | ND                       | 325              | 7,7                        | 1,1                          | 8                  | 811,181             | 774,176                | 37,5                       | NA                            | 0                   |                      |
| PH-175 |             | Chr11 | 15861177-15861428         | 2496                 | ND                       | 251              | 5,1                        | 1,1                          | 6                  | 990,15              | 890,15                 | 100,0                      | NA                            | 0                   |                      |
| PH-176 |             | Chr11 | 15863945-15864196         | 2517                 | ND                       | 5,5              | 3,0                        | 2,0                          | 10                 | 223,25              | 205,23                 | 18,2                       | NA                            | 0                   |                      |
| PH-177 | phasi_NO830 | Chr11 | 15868760-15869011         | 4564                 | ND                       | 283              | 11,9                       | 1,1                          | 5                  | 427,115             | 386,109                | 41,6                       | NA                            | 0                   |                      |
| PH-178 |             | Chr11 | 15868802-15869053         | 4825                 | ND                       | 325              | 12,0                       | 1,1                          | 8                  | 1474,295            | 1082,392               | 392,115                    | NA                            | 0                   |                      |
| PH-179 |             | Chr11 | 15863945-15864196         | 1803                 | ND                       | 388              | 4,3                        | 2,1                          | 4                  | 101,14              | 77,12                  | 24,2                       | NA                            | 0                   |                      |
| PH-180 |             | Chr11 | 15871955-15872206         | 848                  | ND                       | 251              | 5,3                        | 3,0                          | 3                  | 104,13              | 104,13                 | 0,0                        | NA                            | 0                   |                      |
| PH-181 | phasi_NO834 | Chr11 | 16088725-16089076         | 165119               | ND                       | 225              | 4,7                        | 5,5                          | 3                  | 166,106             | 166,106                | 0,0                        | NA                            | 0                   |                      |
| PH-182 |             | Chr11 | 16520278-16520529         | 431302               | ND                       | 251              | 2,2                        | 2,0                          | 2                  | 166,18              | 166,18                 | 0,0                        | NA                            | 0                   |                      |
| PH-183 | phasi_NO843 | Chr11 | 16527812-16527863         | 6883                 | ND                       | 251              | 3,2                        | 3,0                          | 3                  | 131,20              | 131,20                 | 0,0                        | NA                            | 0                   |                      |
| PH-184 | phasi_NO840 | Chr11 | 16531783-16532034         | 4825                 | ND                       | 251              | 9,9                        | 2,0                          | 9                  | 1678,275            | 1678,275               | 0,0                        | NA                            | 0                   |                      |
| PH-185 | phasi_NO797 | Chr11 | 16543023-16543274         | 10989                | ND                       | 251              | 5,3                        | 3,0                          | 3                  | 87,9                | 87,9                   | 0,0                        | NA                            | 0                   |                      |
| PH-186 |             | Chr11 | 16559289-16559540         | 16015                | ND                       | 251              | 3,3                        | 3,0                          | 3                  | 70,12               | 70,12                  | 0,0                        | NA                            | 0                   |                      |
| PH-187 |             | Chr11 | 16566171-16566422         | 2511                 | ND                       | 251              | 3,2                        | 3,0                          | 3                  | 107,2               | 97,2                   | 10,0                       | NA                            | 0                   |                      |
| PH-188 | phasi_NO846 | Chr11 | 16583356-16583787         | 17114                | ND                       | 251              | 4,3                        | 4,0                          | 4                  | 92,8                | 92,8                   | 0,0                        | NA                            | 0                   |                      |
| PH-189 |             | Chr11 | 16599291-16599542         | 15504                | ND                       | 251              | 4,3                        | 1,1                          | 3                  | 131,18              | 89,13                  | 42,5                       | NA                            | 0                   |                      |
| PH-190 | phasi_NO849 | Chr11 | 16633092-16633543         | 4825                 | ND                       | 251              | 4,4                        | 4,0                          | 4                  | 335,33              | 335,33                 | 0,0                        | NA                            | 0                   |                      |
| PH-191 |             | Chr11 | 16670420-16670671         | 17077                | ND                       | 251              | 2,2                        | 3,3                          | 5                  | 43,53               | 20,35                  | 23,18                      | Rep_LOC_Os12g31040,Rep_LOC_C  | 5                   |                      |
| PH-192 |             | Chr11 | 19501355-19501606         | 2630684              | ND                       | 251              | 3,0                        | 1,1                          | 3                  | 474,71              | 474,71                 | 0,0                        | NA                            | 0                   |                      |
| PH-193 |             | Chr11 | 19502297-19502548         | 691                  | ND                       | 251              | 3,3                        | 1,1                          | 2                  | 1667,151            | 171,17                 | 1596,134                   | NA                            | 0                   |                      |
| PH-194 | phasi_NO869 | Chr11 | 22978397-22978648         | 3475849              | ND                       | 531              | 12,9                       | 5,3                          | 12                 | 891,85              | 499,62                 | 392,23                     | NA                            | 0                   |                      |
| PH-195 |             | Chr11 | 22988732-22989083         | 10194                | ND                       | 251              | 5,3                        | 3,0                          | 3                  | 182,19              | 182,19                 | 0,0                        | NA                            | 0                   |                      |
| PH-196 |             | Chr11 | 22990366-22990617         | 1363                 | ND                       | 251              | 5,4                        | 5,0                          | 2                  | 164,13              | 164,13                 | 0,0                        | NA                            | 0                   |                      |
| PH-197 |             | Chr11 | 22993020-22993271         | 2403                 | ND                       | 251              | 12,10                      | 5,3                          | 13                 | 2867,342            | 2721,335               | 146,7                      | NA                            | 0                   |                      |
| PH-198 | phasi_NO864 | Chr11 | 23001541-23001792         | 8270                 | ND                       | 251              | 8,6                        | 6,0                          | 7                  | 474,71              | 474,71                 | 0,0                        | NA                            | 0                   |                      |
| PH-199 | phasi_NO861 | Chr11 | 23005331-23005582         | 3539                 | ND                       | 5,5              | 10,4                       | 0,0                          | 5                  | 104,0               | 104,0                  | 0,0                        | NA                            | 0                   |                      |
| PH-200 | phasi_NO862 | Chr11 | 23008631-23008882         | 3049                 | ND                       | 251              | 3,0                        | 3,0                          | 3                  | 79,0                | 79,0                   | 0,0                        | NA                            | 0                   |                      |
| PH-201 | phasi_NO856 | Chr11 | 23035667-23035918         | 25785                | ND                       | 251              | 4,1                        | 1,0                          | 3                  | 444,83              | 444,83                 | 0,0                        | NA                            | 0                   |                      |
| PH-202 | phasi_NO854 | Chr11 | 23043206-23043457         | 7288                 | ND                       | 4,4              | 5,4                        | 4,0                          | 4                  | 176,20              | 176,20                 | 0,0                        | NA                            | 0                   |                      |
| PH-203 |             | Chr11 | 23044310-23044561         | 853                  | ND                       | 251              | 4,3                        | 3,0                          | 1                  | 60,14               | 60,14                  | 0,0                        | NA                            | 0                   |                      |
| PH-204 | phasi_NO852 | Chr11 | 23056510-23056761         | 9949                 | ND                       | 251              | 2,1                        | 4,0                          | 7                  | 350,49              | 303,39                 | 47,6                       | NA                            | 0                   |                      |
| PH-205 |             | Chr11 | 23056313-23056564         | 1552                 | ND                       | 3,3              | 4,3                        | 3,0                          | 3                  | 140,23              | 140,23                 | 0,0                        | NA                            | 0                   |                      |
| PH-206 |             | Chr11 | 24242636-24242887         | 1186072              | ND                       | 514              | 4,2                        | 1,0                          | 2                  | 343,8               | 132,8                  | 31,0                       | NA                            | 0                   |                      |
| PH-207 |             | Chr11 | 24248173-24248424         | 5286                 | ND                       | 251              | 3,0                        | 3,0                          | 3                  | 444,83              | 444,83                 | 0,0                        | NA                            | 0                   |                      |
| PH-208 | phasi_NO901 | Chr11 | 24335644-24335895         | 87220                | ND                       | 251              | 1,1                        | 8,8                          | 9                  | 344,38              | 304,36                 | 40,2                       | NA                            | 0                   |                      |
| PH-209 |             | Chr11 | 24341060-24341311         | 5165                 | ND                       | 251              | 3,2                        | 2,0                          | 2                  | 71,17               | 71,17                  | 0,0                        | NA                            | 0                   |                      |
| PH-210 |             | Chr11 | 24345298-24345549         | 3917                 | ND                       | 251              | 5,3                        | 3,0                          | 4                  | 260,36              | 260,36                 | 0,0                        | NA                            | 0                   |                      |
| PH-211 |             | Chr11 | 24347135-24347386         | 1656                 | ND                       | 3,3              | 3,3                        | 3,0                          | 3                  | 260,36              | 260,36                 | 0,0                        | NA                            | 0                   |                      |
| PH-212 | phasi_NO784 | Chr11 | 24404640-24404891         | 57254                | ND                       | 251              | 4,3                        | 4,0                          | 3                  | 188,41              | 188,41                 | 0,0                        | NA                            | 0                   |                      |
| PH-213 |             | Chr11 | 24406940-24407191         | 2049                 | ND                       | 251              | 6,4                        | 1,0                          | 4                  | 455,72              | 441,72                 | 14,0                       | NA                            | 0                   |                      |
| PH-214 |             | Chr11 | 24411199-24411450         | 4008                 | ND                       | 251              | 3,3                        | 3,0                          | 3                  | 172,16              | 172,16                 | 0,0                        | LOC_Os03g06710                | 1                   |                      |
| PH-215 |             | Chr11 | 24412137-24412388         | 687                  | ND                       | 251              | 6,6                        | 1,0                          | 5                  | 587,84              | 570,84                 | 17,0                       | NA                            | 0                   |                      |
| PH-216 | phasi_NO749 | Chr11 | 24456182-24457163         | 4824                 | ND                       | 251              | 1,0                        | 4,0                          | 1                  | 107,3               | 107,3                  | 0,0                        | NA                            | 0                   |                      |
| PH-217 |             | Chr11 | 24459949-24460200         | 27                   |                          |                  |                            |                              |                    |                     |                        |                            |                               |                     |                      |

| Name   | Alt_name    | Chr   | Positions (sRNAworkbench) | Dist_w/previous (bp) | MEME motif position (bp) | Size_w/MEME (bp) | Phased clusters nb (Ob_Og) | Unphased_clusters nb (Ob_Og) | Common clusters nb | Diff exp cluster nb | Total reads nb (Ob_Og) | Total phased_reads (Ob_Og) | Total unphased_reads (Ob_Og) | Annotation | Pipeline | Annotated cluster nb        |   |
|--------|-------------|-------|---------------------------|----------------------|--------------------------|------------------|----------------------------|------------------------------|--------------------|---------------------|------------------------|----------------------------|------------------------------|------------|----------|-----------------------------|---|
| PH-130 |             | Chr11 | 25123267-25123518         |                      | 4543                     | -116             | 367                        | 4,4                          | 1,0                | 4                   | 210                    | 35                         | 200                          | 35         | 10,0     | NA                          | 0 |
| PH-131 | phasi_NO889 | Chr11 | 25126434-25126685         |                      | 2916                     | -32              | 283                        | 6,6                          | 1,1                | 7                   | 272                    | 34                         | 213                          | 31         | 12,3     | NA                          | 0 |
| PH-132 |             | Chr11 | 25132240-25132491         |                      | 5555                     | -53              | 304                        | 6,6                          | No                 | 6                   | 1855                   | 226                        | 1855                         | 226        | 0,0      | NA                          | 0 |
| PH-133 | phasi_NO895 | Chr11 | 25138032-25138283         |                      | 5541                     | -32              | 283                        | 10,10                        | No                 | 10                  | 317                    | 53                         | 217                          | 53         | 0,0      | NA                          | 0 |
| PH-134 | phasi_NO890 | Chr11 | 25140219-25140470         |                      | 1936                     | -53              | 251                        | 3,3                          | No                 | 3                   | 1460                   | 146                        | 1460                         | 146        | 0,0      | NA                          | 0 |
| PH-135 |             | Chr11 | 25147966-25148217         |                      | 7496                     | -32              | 283                        | 3,3                          | No                 | 3                   | 204                    | 50                         | 204                          | 50         | 0,0      | NA                          | 0 |
| PH-136 | phasi_NO911 | Chr11 | 26322892-26322943         |                      | 1174475                  | -32              | 283                        | 10,8                         | No                 | 8                   | 1827                   | 252                        | 1827                         | 252        | 0,0      | NA                          | 0 |
| PH-137 |             | Chr11 | 26324287-26324538         |                      | 1384                     | -53              | 304                        | 7,5                          | 2,2                | 5                   | 2109                   | 356                        | 2045                         | 359        | 64,17    | NA                          | 0 |
| PH-138 |             | Chr11 | 26325000-26325251         |                      | 462                      | -95              | 346                        | 4,3                          | No                 | 4                   | 94                     | 8                          | 94                           | 8          | 0,0      | NA                          | 0 |
| PH-139 |             | Chr11 | 26331339-26331590         |                      | 6084                     | -53              | 304                        | 3,3                          | No                 | 3                   | 137                    | 28                         | 137                          | 28         | 0,0      | NA                          | 0 |
| PH-140 | phasi_NO913 | Chr11 | 26332907-26333158         |                      | 1321                     | -32              | 283                        | 9,7                          | 1,1                | 8                   | 798                    | 104                        | 700                          | 102        | 28,2     | NA                          | 0 |
| PH-141 |             | Chr11 | 26333942-26334193         |                      | 784                      | -74              | 325                        | 3,1                          | No                 | 1                   | 77                     | 10                         | 77                           | 10         | 0,0      | NA                          | 0 |
| PH-142 |             | Chr11 | 26335929-26336180         |                      | 1732                     | -32              | 283                        | 7,4                          | 1,1                | 5                   | 215                    | 22                         | 203                          | 20         | 12,2     | NA                          | 0 |
| PH-143 | phasi_NO914 | Chr11 | 26338599-26338850         |                      | 7223                     | -137             | 388                        | 6,6                          | 1,1                | 6                   | 165                    | 11                         | 137                          | 9          | 28,2     | NA                          | 0 |
| PH-144 |             | Chr11 | 26348012-26348263         |                      | 9362                     | -32              | 283                        | 5,4                          | 4                  | 3                   | 122                    | 29                         | 122                          | 29         | 0,0      | NA                          | 0 |
| PH-145 |             | Chr11 | 26348871-26349122         |                      | 608                      | ND               | 251                        | 5,3                          | No                 | 5                   | 272                    | 28                         | 272                          | 28         | 0,0      | NA                          | 0 |
| PH-146 |             | Chr11 | 26385399-26385650         |                      | 36277                    | -30              | 641                        | 7,6                          | 1,1                | 7                   | 1121                   | 157                        | 993                          | 143        | 128,14   | NA                          | 0 |
| PH-147 | phasi_NO129 | Chr11 | 26390581-26390832         |                      | 4931                     | -263             | 514                        | 3,3                          | No                 | 1                   | 68                     | 12                         | 68                           | 12         | 0,0      | NA                          | 0 |
| PH-258 |             | Chr12 | 349889-350129             |                      | ND                       | 251              | 3,3                        | 3,3                          | 6                  | 1                   | 134                    | 179                        | 33                           | 49         | 101,130  | osa-MIR819                  | 6 |
| PH-298 |             | Chr12 | 2275036-2275287           |                      | 1924897                  | ND               | 251                        | 1,1                          | 3                  | 1                   | 568                    | 43                         | 568                          | 43         | 0,0      | NA                          | 0 |
| PH-299 |             | Chr12 | 2282098-2282349           |                      | 6811                     | ND               | 251                        | 1,1                          | 0,0                | 3                   | 77                     | 2                          | 58                           | 2          | 19,0     | Rep_LOC_Os12g05160          | 2 |
| PH-300 |             | Chr12 | 2284146-2284397           |                      | 1797                     | ND               | 251                        | 6,6                          | No                 | 6                   | 364                    | 64                         | 364                          | 64         | 0,0      | LOC_Os11g36780              | 1 |
| PH-357 |             | Chr12 | 3143543-3143794           |                      | 859146                   | ND               | 251                        | 4,4                          | 4                  | 3                   | 170                    | 25                         | 170                          | 25         | 0,0      | NA                          | 0 |
| PH-359 |             | Chr12 | 7588926-7589177           |                      | 4415132                  | -137             | 388                        | 3,3                          | 2,2                | 4                   | 378                    | 46                         | 45                           | 33         | 333,38   | NA                          | 0 |
| PH-360 |             | Chr12 | 8080835-8080886           |                      | 529258                   | -47              | 298                        | 7,6                          | No                 | 6                   | 779                    | 106                        | 779                          | 106        | 0,0      | NA                          | 0 |
| PH-361 | phasi_NO926 | Chr12 | 8090253-8090504           |                      | 1567                     | -158             | 409                        | 4,3                          | 1,1                | 4                   | 144                    | 13                         | 114                          | 11         | 30,2     | NA                          | 0 |
| PH-362 |             | Chr12 | 8126400-8126651           |                      | 35896                    | ND               | 251                        | 3,2                          | 2,2                | 2                   | 64                     | 11                         | 64                           | 11         | 0,0      | NA                          | 0 |
| PH-363 | phasi_NO928 | Chr12 | 8154176-8154427           |                      | 2725                     | -221             | 472                        | 4,3                          | No                 | 4                   | 74                     | 25                         | 74                           | 25         | 0,0      | LOC_Os12g14310              | 3 |
| PH-364 | phasi_NO929 | Chr12 | 8180666-8180917           |                      | 26239                    | -137             | 388                        | 5,3                          | 3,2                | 5                   | 629                    | 45                         | 584                          | 41         | 93,14    | Rep_LOC_Os12g14360          | 8 |
| PH-365 | phasi_NO333 | Chr12 | 8746171-8746422           |                      | 565254                   | -4               | 251                        | 6,6                          | 1,1                | 4                   | 434                    | 111                        | 421                          | 108        | 13,3     | NA                          | 0 |
| PH-366 |             | Chr12 | 9190178-9190429           |                      | 40556                    | -218             | 512                        | 4,6                          | 3,2                | 5                   | 219                    | 38                         | 219                          | 38         | 188,28   | NA                          | 0 |
| PH-171 |             | Chr12 | 10228672-10228923         |                      | 1038243                  | -32              | 283                        | 5,3                          | No                 | 3                   | 157                    | 21                         | 157                          | 21         | 0,0      | NA                          | 0 |
| PH-172 |             | Chr12 | 10877954-10878205         |                      | 649031                   | ND               | 251                        | 2,2                          | 1,1                | 2                   | 25                     | 43                         | 17                           | 37         | 8,6      | Rep_LOC_Os12g31040,Rep_LOC_ | 3 |
| PH-173 |             | Chr12 | 13785019-13785270         |                      | 214892                   | ND               | 251                        | 2,2                          | No                 | 2                   | 61                     | 12                         | 61                           | 12         | 0,0      | NA                          | 0 |
| PH-174 |             | Chr12 | 13970762-13971013         |                      | 214892                   | ND               | 251                        | 5,5                          | 5                  | 5                   | 3303                   | 362                        | 300                          | 8          | 0,0      | NA                          | 0 |
| PH-175 |             | Chr12 | 14059344-14059595         |                      | 88331                    | -53              | 304                        | 3,1                          | No                 | 3                   | 390                    | 8                          | 390                          | 8          | 0,0      | NA                          | 0 |
| PH-176 | phasi_NO923 | Chr12 | 14178228-14178479         |                      | 118600                   | ND               | 251                        | 1,1                          | 4,4                | 5                   | 186                    | 53                         | 111                          | 2          | 0,0      | NA                          | 0 |
| PH-177 |             | Chr12 | 14290466-14290717         |                      | 111990                   | ND               | 251                        | 2,2                          | No                 | 2                   | 22                     | 5                          | 22                           | 5          | 0,0      | NA                          | 0 |
| PH-178 |             | Chr12 | 14459038-14459289         |                      | 83521                    | -74              | 325                        | 5,4                          | 2,2                | 4                   | 600                    | 77                         | 575                          | 71         | 25,5     | NA                          | 0 |
| PH-179 |             | Chr12 | 14466213-14466464         |                      | 6024                     | -53              | 304                        | 5,3                          | No                 | 3                   | 542                    | 68                         | 520                          | 68         | 22,0     | NA                          | 0 |
| PH-180 |             | Chr12 | 14546869-14547120         |                      | 80405                    | ND               | 251                        | 5,5                          | 3                  | 3                   | 308                    | 54                         | 308                          | 54         | 0,0      | NA                          | 0 |
| PH-181 |             | Chr12 | 14602391-14602642         |                      | 81711                    | ND               | 251                        | 5,5                          | No                 | 5                   | 190                    | 45                         | 190                          | 45         | 0,0      | NA                          | 0 |
| PH-182 |             | Chr12 | 14603208-14603459         |                      | 566                      | ND               | 251                        | 4,4                          | 1,0                | 4                   | 209                    | 22                         | 194                          | 22         | 15,0     | NA                          | 0 |
| PH-183 |             | Chr12 | 14677516-14677767         |                      | 74057                    | -179             | 430                        | 3,3                          | 3                  | 1                   | 57                     | 10                         | 45                           | 7          | 12,3     | NA                          | 0 |
| PH-184 | phasi_NO968 | Chr12 | 14938113-14938364         |                      | 40556                    | -74              | 325                        | 2,2                          | No                 | 2                   | 24                     | 24                         | 24                           | 24         | 0,0      | NA                          | 0 |
| PH-185 | phasi_NO967 | Chr12 | 14944344-14944595         |                      | 5780                     | -186             | 437                        | 2,2                          | No                 | 2                   | 62                     | 8                          | 62                           | 8          | 0,0      | NA                          | 0 |
| PH-186 | phasi_NO958 | Chr12 | 15158603-15158854         |                      | 214008                   | ND               | 251                        | 9,6                          | No                 | 6                   | 257                    | 25                         | 105                          | 9          | 152,16   | NA                          | 0 |
| PH-187 | phasi_NO957 | Chr12 | 15164638-15164889         |                      | 124                      | -124             | 175                        | 3,3                          | 1,1                | 3                   | 245                    | 17                         | 245                          | 17         | 0,0      | osa-MIR5506                 | 1 |
| PH-188 | phasi_NO956 | Chr12 | 15171729-15171980         |                      | 6840                     | ND               | 251                        | 9,7                          | No                 | 7                   | 297                    | 32                         | 255                          | 26         | 42,6     | NA                          | 0 |
| PH-189 | phasi_NO955 | Chr12 | 15176172-15176423         |                      | 4192                     | -32              | 283                        | 3,2                          | No                 | 3                   | 252                    | 23                         | 252                          | 23         | 0,0      | NA                          | 0 |
| PH-190 | phasi_NO954 | Chr12 | 15187039-15187290         |                      | 10616                    | -53              | 304                        | 5,3                          | No                 | 5                   | 1168                   | 123                        | 1168                         | 123        | 0,0      | NA                          | 0 |
| PH-191 |             | Chr12 | 15206882-15207133         |                      | 19592                    | -53              | 304                        | 4,3                          | No                 | 4                   | 116                    | 6                          | 116                          | 6          | 0,0      | NA                          | 0 |
| PH-192 | phasi_NO952 | Chr12 | 15214289-15214540         |                      | 7156                     | -74              | 325                        | 6,3                          | 2,2                | 5                   | 324                    | 37                         | 287                          | 32         | 37,5     | NA                          | 0 |
| PH-193 |             | Chr12 | 15215752-15216003         |                      | 40556                    | -157             | 417                        | 5,3                          | 1,1                | 5                   | 115                    | 8                          | 59                           | 2          | 65,6     | NA                          | 0 |
| PH-194 | phasi_NO948 | Chr12 | 15312743-15312994         |                      | 96740                    | ND               | 251                        | 5,3                          | No                 | 3                   | 152                    | 26                         | 152                          | 26         | 0,0      | NA                          | 0 |
| PH-195 | phasi_NO949 | Chr12 | 15317943-15318194         |                      | 4949                     | ND               | 251                        | 6,5                          | 1,1                | 6                   | 206                    | 34                         | 198                          | 26         | 8,8      | NA                          | 0 |
| PH-196 |             | Chr12 | 15319413-15319664         |                      | 218                      | ND               | 251                        | 218                          | 3                  | 3                   | 198                    | 20                         | 198                          | 20         | 0,0      | NA                          | 0 |
| PH-197 |             | Chr12 | 15533611-15533862         |                      | 213947                   | -42              | 304                        | 4,1                          | No                 | 1                   | 423                    | 3                          | 0                            | 0          | 423,3    | NA                          | 0 |
| PH-198 |             | Chr12 | 15533517-15533768         |                      | 1655                     | -86              | 337                        | 4,1                          | 2,2                | 4                   | 1266                   | 149                        | 417                          | 42         | 849,107  | NA                          | 0 |
| PH-200 |             | Chr12 | 15543835-15544086         |                      | 40556                    | ND               | 251                        | 4,4                          | No                 | 4                   | 98                     | 14                         | 98                           | 14         | 0,0      | NA                          | 0 |
| PH-201 |             | Chr12 | 15599156-15599407         |                      | 15070                    | ND               | 251                        | 4,2                          | 4,4                | 2                   | 132                    | 10                         | 16                           | 0          | 116,10   | NA                          | 0 |
| PH-202 |             | Chr12 | 15561430-15561681         |                      | 2023                     | ND               | 251                        | 2,0                          | No                 | 3                   | 371                    | 426                        | 370                          | 426        | 0,0      | NA                          | 0 |
| PH-203 |             | Chr12 | 15568353-15568604         |                      | 6272                     | ND               | 251                        | 7,4                          | 4,4                | 8                   | 555                    | 35                         | 504                          | 35         | 51,0     | NA                          | 0 |
| PH-204 |             | Chr12 | 15600027-15600278         |                      | 31423                    | -213             | 464                        | 6,5                          | 2,0                | 5                   | 3795                   | 430                        | 3739                         | 430        | 56,0     | NA                          | 0 |
| PH-205 |             | Chr12 | 15602322-15602573         |                      | 40556                    | -53              | 304                        | 5,3                          | No                 | 5                   | 150                    | 16                         | 150                          | 16         | 0,0      | NA                          | 0 |
| PH-206 |             | Chr12 | 15617641-15617892         |                      | 15068                    | -137             | 388                        | 4,4                          | 3                  | 3                   | 1528                   | 95                         | 263                          | 17         | 1265,78  | NA                          | 0 |
| PH-207 |             | Chr12 | 15624445-15624696         |                      | 6553                     | -137             | 388                        | 4,1                          | 1,1                | 4                   | 467                    | 10                         | 423                          | 3          | 44,7     | NA                          | 0 |
| PH-208 |             | Chr12 | 16210143-16210394         |                      | 58547                    | -440             | 691                        | 5,5                          | 5                  | 5                   | 201                    | 34                         | 201                          | 34         | 0,0      | NA                          | 0 |
| PH-209 |             | Chr12 | 16259099-16259350         |                      | 48705                    | -53              | 304                        | 5,5                          | No                 | 5                   | 423                    | 39                         | 423                          | 39         | 0,0      | NA                          | 0 |
| PH-210 |             | Chr12 | 16346492-16346743         |                      | 87142                    | -32              | 283                        | 5,5                          | No                 | 4                   | 502                    | 117                        | 502                          | 117        | 0,0      | NA                          | 0 |
| PH-211 | phasi_NO978 | Chr12 | 18023937-18023188         |                      | 1676194                  | -74              | 325                        | 7,7                          | 1,0                | 7                   | 315                    | 74                         | 301                          | 74         | 14,0     | NA                          | 0 |
| PH-212 | phasi_NO979 | Chr12 | 18039120-18039371         |                      | 15932                    | ND               | 251                        | 4,1                          | No                 | 1                   | 104                    | 24                         | 104                          | 24         | 0,0      | osa-MIR5488                 | 3 |
| PH-213 | phasi_NO981 | Chr12 | 18040350-18040601         |                      | 979                      | -53              | 304                        | 6,6                          | No                 | 4                   | 875                    | 281                        | 875                          | 281        | 0,0      | NA                          | 0 |
| PH-214 | phasi_NO983 | Chr12 | 18069786-18070037         |                      | 29185                    | -53              | 304                        | 3,3                          | No                 | 3                   | 36                     | 17                         | 36                           | 17         | 0,0      | Rep_LOC_Os12g34710          | 1 |
| PH-215 | phasi_NO984 | Chr12 | 18076990-18077241         |                      | 6953                     | -207             | 458                        | 6,6                          | 5,5                | 11                  | 557                    | 220                        | 191                          | 68         | 366,152  | NA                          | 0 |
| PH-216 |             | Chr12 | 18088718-18088969         |                      | 9477                     | ND               | 251                        | 7,7                          | 4                  | 4                   | 462                    | 153                        | 436                          | 142        | 26,11    | NA                          | 0 |
| PH-217 |             | Chr12 | 18102114-18102365         |                      | 15145                    | -116             | 346                        | 5,3                          | 1,1                | 5                   | 357                    | 21                         | 329                          | 17         | 78,4     | NA                          | 0 |
| PH-218 | phasi_NO990 | Chr12 | 18176607-18176858         |                      | 74242                    | -4               | 367                        | 4,1                          | No                 | 4                   | 122                    | 17                         | 86                           | 12         | 36,5     | NA                          | 0 |
| PH-219 | phasi_NO993 | Chr12 | 18179402-18179653         |                      | 2544                     | -53              | 304                        | 3,3                          | No                 | 2                   | 99                     | 10                         | 99                           | 10         | 0,0      | NA                          | 0 |
| PH-220 |             | Chr12 | 18180483-18180734         |                      | 30830                    | -116             | 367                        | 3,3                          | 1,0                | 3                   | 317                    | 26                         | 306                          | 26         | 11,0     | NA                          | 0 |
| PH-221 |             |       |                           |                      |                          |                  |                            |                              |                    |                     |                        |                            |                              |            |          |                             |   |



| Name   | Alt_name     | Chr   | Positions (sRNAworkbench) | Dist_w/previous (bp) | MEME motif position (bp) | Size_w/MEME | Phased clusters nb (Ob_Og) | Unphased_clusters nb (Ob_Og) | Common clusters nb | Diff exp cluster nb | Total_reads nb (Ob_Og) | Total_phased_reads (Ob_Og) | Total_unphased_reads (Ob_Og) | Annotation                   | Pipeline | Annotated cluster nb |
|--------|--------------|-------|---------------------------|----------------------|--------------------------|-------------|----------------------------|------------------------------|--------------------|---------------------|------------------------|----------------------------|------------------------------|------------------------------|----------|----------------------|
| PH-254 | phasi_NO1034 | Chr12 | 21175560-21175811         | 2070                 | -200                     | 451         | 4, 3                       | 2, 0                         | 3                  | 5                   | 125 13                 | 102, 13                    | 23, 0                        | NA                           |          | 0                    |
| PH-255 | -            | Chr12 | 21178057-21181008         | 2246                 | 398                      | 649         | 3, 3                       | 2, 2                         | 4                  | 4                   | 2198 251               | 692, 68                    | 1511, 183                    | NA                           |          | 0                    |
| PH-256 | -            | Chr12 | 21182029-21182280         | 3721                 | -32                      | 283         | 9, 7                       | No                           | 7                  | 8                   | 1412, 235              | 1412, 235                  | 0, 0                         | NA                           |          | 0                    |
| PH-257 | -            | Chr12 | 21185743-21185994         | 3463                 | -32                      | 251         | 3, 1                       | No                           | 1                  | 2                   | 47, 2                  | 47, 2                      | 0, 0                         | NA                           |          | 0                    |
| PH-258 | -            | Chr12 | 21187626-21187777         | 152                  | -32                      | 251         | 8, 7                       | No                           | 7                  | 6                   | 2196, 247              | 2196, 247                  | 0, 0                         | LOC_Os12g34810,LOC_Os12g3948 |          | 4                    |
| PH-259 | -            | Chr12 | 21190312-21190563         | 2135                 | -326                     | 577         | 3, 2                       | 5, 1                         | 3                  | 7                   | 250, 16                | 61, 4                      | 189, 12                      | NA                           |          | 0                    |
| PH-260 | -            | Chr12 | 21193663-21193914         | 3100                 | -32                      | 251         | 4, 4                       | No                           | 4                  | 4                   | 146, 14                | 146, 14                    | 0, 0                         | NA                           |          | 0                    |
| PH-261 | phasi_NO1038 | Chr12 | 21194309-21194560         | 3295                 | ND                       | 251         | 4, 4                       | No                           | 4                  | 4                   | 211, 20                | 211, 20                    | 0, 0                         | NA                           |          | 0                    |
| PH-262 | -            | Chr12 | 21716194-21716445         | 521634               | -136                     | 387         | 4, 2                       | 2, 1                         | 3                  | 3                   | 78, 9                  | 50, 5                      | 28, 4                        | NA                           |          | 0                    |
| PH-263 | phasi_NO1040 | Chr12 | 21733134-21733385         | 16689                | -53                      | 304         | 3, 3                       | 5, 3                         | 4                  | 4                   | 284, 44                | 284, 44                    | 0, 0                         | NA                           |          | 0                    |
| PH-264 | -            | Chr12 | 21751341-21751592         | 17956                | -116                     | 367         | 5, 5                       | 1, 0                         | 2                  | 5                   | 122, 5                 | 122, 5                     | 19, 0                        | NA                           |          | 0                    |
| PH-265 | phasi_NO141  | Chr12 | 21768161-21768412         | 16569                | -32                      | 283         | 9, 9                       | 13, 9                        | 12                 | 12                  | 444, 31                | 444, 31                    | 0, 0                         | NA                           |          | 0                    |
| PH-266 | phasi_NO1044 | Chr12 | 21781605-21781856         | 13193                | -95                      | 346         | 3, 1                       | 2, 1                         | 4                  | 4                   | 110, 7                 | 55, 2                      | 54, 5                        | NA                           |          | 0                    |
| PH-267 | -            | Chr12 | 21782399-21782610         | 503                  | -32                      | 304         | 2, 2                       | 2, 2                         | 2                  | 2                   | 43, 6                  | 43, 6                      | 0, 0                         | osa-MIR5530                  |          | 1                    |
| PH-268 | phasi_NO1045 | Chr12 | 21791017-21791268         | 8407                 | -74                      | 325         | 5, 3                       | No                           | 3                  | 5                   | 125, 12                | 125, 12                    | 0, 0                         | NA                           |          | 0                    |
| PH-269 | -            | Chr12 | 21793081-21793332         | 1813                 | -32                      | 283         | 5, 3                       | No                           | 3                  | 5                   | 164, 11                | 164, 11                    | 0, 0                         | NA                           |          | 0                    |
| PH-270 | phasi_NO1046 | Chr12 | 21798178-21798429         | 4846                 | -74                      | 325         | 4, 4                       | No                           | 4                  | 4                   | 118, 14                | 118, 14                    | 0, 0                         | NA                           |          | 0                    |
| PH-271 | phasi_NO1047 | Chr12 | 21800908-21801159         | 2479                 | -32                      | 283         | 9, 6                       | No                           | 6                  | 9                   | 492, 47                | 474, 47                    | 18, 0                        | NA                           |          | 0                    |
| PH-272 | -            | Chr12 | 21817326-21817577         | 16167                | -139                     | 390         | 4, 4                       | 2, 2                         | 6                  | 3                   | 237, 57                | 111, 37                    | 126, 20                      | NA                           |          | 0                    |
| PH-273 | -            | Chr12 | 21819659-21819910         | 2082                 | -32                      | 283         | 9, 7                       | 1, 0                         | 8                  | 9                   | 1178, 174              | 1157, 169                  | 21, 5                        | NA                           |          | 0                    |
| PH-274 | -            | Chr12 | 21868730-21868981         | 48820                | -32                      | 283         | 4, 1                       | No                           | 1                  | 4                   | 164, 2                 | 164, 2                     | 0, 0                         | NA                           |          | 0                    |
| PH-275 | phasi_NO1050 | Chr12 | 21876328-21876579         | 9657                 | -32                      | 283         | 8, 6                       | No                           | 6                  | 8                   | 2239, 191              | 2239, 191                  | 0, 0                         | NA                           |          | 0                    |
| PH-276 | phasi_NO1052 | Chr12 | 21892819-21893070         | 13930                | -53                      | 304         | 7, 6                       | 3, 2                         | 8                  | 9                   | 1769, 162              | 1317, 107                  | 452, 55                      | NA                           |          | 0                    |
| PH-277 | phasi_NO1052 | Chr12 | 21907584-21907835         | 14514                | -32                      | 304         | 7, 5                       | 2, 2                         | 7                  | 7                   | 838, 100               | 535, 62                    | 303, 38                      | NA                           |          | 0                    |
| PH-278 | -            | Chr12 | 21907836-21908087         | 1                    | -305                     | 556         | 10, 8                      | 3, 2                         | 10                 | 10                  | 955, 132               | 99, 32                     | 856, 100                     | NA                           |          | 0                    |
| PH-279 | -            | Chr12 | 21912867-21913118         | 3385                 | -53                      | 304         | 4, 1                       | No                           | 1                  | 4                   | 128, 3                 | 128, 3                     | 0, 0                         | NA                           |          | 0                    |
| PH-280 | phasi_NO1054 | Chr12 | 21913618-21913869         | 500                  | -32                      | 283         | 6, 4                       | 2, 1                         | 8                  | 8                   | 695, 36                | 591, 30                    | 94, 6                        | NA                           |          | 0                    |
| PH-281 | -            | Chr12 | 21923302-21923553         | 9433                 | -242                     | 493         | 3, 2                       | No                           | 3                  | 4                   | 98, 9                  | 98, 9                      | 0, 0                         | NA                           |          | 0                    |
| PH-282 | -            | Chr12 | 22001616-22001867         | 7463                 | -32                      | 283         | 4, 0                       | No                           | 0                  | 4                   | 146, 0                 | 146, 0                     | 0, 0                         | NA                           |          | 0                    |
| PH-283 | phasi_NO1060 | Chr12 | 22016881-22017132         | 1954                 | -32                      | 283         | 7, 5                       | No                           | 5                  | 7                   | 464, 135               | 464, 135                   | 0, 0                         | NA                           |          | 0                    |
| PH-284 | phasi_NO1061 | Chr12 | 22017835-22018086         | 703                  | -116                     | 367         | 4, 2                       | No                           | 2                  | 4                   | 556, 27                | 556, 27                    | 0, 0                         | NA                           |          | 0                    |
| PH-285 | phasi_NO1062 | Chr12 | 22021025-22021276         | 2939                 | -32                      | 283         | 3, 0                       | 1, 0                         | 0                  | 4                   | 48, 0                  | 36, 0                      | 12, 0                        | NA                           |          | 0                    |
| PH-286 | phasi_NO1065 | Chr12 | 22033423-22033674         | 2147                 | -324                     | 375         | 3, 2                       | 2, 2                         | 2                  | 2                   | 44, 5                  | 398, 30                    | 4, 0                         | NA                           |          | 0                    |
| PH-287 | -            | Chr12 | 22037519-22037770         | 3845                 | -74                      | 325         | 8, 4                       | 1, 0                         | 4                  | 8                   | 683, 46                | 669, 46                    | 14, 0                        | NA                           |          | 0                    |
| PH-288 | -            | Chr12 | 22040293-22040544         | 2523                 | -32                      | 283         | 4, 2                       | 1, 0                         | 2                  | 4                   | 147, 4                 | 131, 4                     | 16, 0                        | NA                           |          | 0                    |
| PH-289 | -            | Chr12 | 22043854-22044105         | 3310                 | -96                      | 466         | 4, 4                       | 2, 0                         | 5                  | 5                   | 213, 28                | 69, 2                      | 144, 0                       | NA                           |          | 0                    |
| PH-290 | phasi_NO1069 | Chr12 | 22050556-22050907         | 6551                 | -32                      | 283         | 5, 4                       | No                           | 4                  | 4                   | 255, 33                | 255, 33                    | 0, 0                         | LOC_Os12g36030.3             |          | 5                    |
| PH-291 | phasi_NO1070 | Chr12 | 22053986-22054237         | 3279                 | -32                      | 304         | 2, 2                       | 3, 2                         | 2                  | 2                   | 130, 10                | 130, 10                    | 0, 0                         | LOC_Os12g36030.2             |          | 5                    |
| PH-292 | phasi_NO1071 | Chr12 | 22058131-22058382         | 3894                 | -32                      | 283         | 6, 3                       | 2, 1                         | 8                  | 8                   | 951, 64                | 796, 52                    | 195, 12                      | NA                           |          | 0                    |
| PH-293 | phasi_NO1073 | Chr12 | 22062553-22062804         | 4171                 | -53                      | 304         | 8, 5                       | 1, 1                         | 6                  | 7                   | 707, 73                | 686, 66                    | 21, 7                        | NA                           |          | 0                    |
| PH-294 | -            | Chr12 | 22066748-22066999         | 1                    | -53                      | 304         | 3, 1                       | No                           | 1                  | 3                   | 283, 3                 | 101, 3                     | 182, 0                       | NA                           |          | 0                    |
| PH-295 | phasi_NO1075 | Chr12 | 22073694-22073945         | 6703                 | -32                      | 283         | 3, 3                       | No                           | 3                  | 3                   | 127, 13                | 127, 13                    | 0, 0                         | NA                           |          | 0                    |
| PH-296 | -            | Chr12 | 22114897-22115148         | 40952                | -32                      | 283         | 4, 4                       | No                           | 4                  | 6                   | 500, 44                | 500, 44                    | 0, 0                         | NA                           |          | 0                    |
| PH-297 | phasi_NO1084 | Chr12 | 22119274-22119525         | 1139                 | -53                      | 344         | 6, 4                       | 2, 1                         | 7                  | 7                   | 2188, 244              | 61, 2                      | 2127, 281                    | NA                           |          | 0                    |
| PH-300 | -            | Chr12 | 24252550-24252801         | 2133025              | -51                      | 302         | 5, 5                       | 3, 0                         | 5                  | 5                   | 272, 63                | 199, 63                    | 73, 0                        | NA                           |          | 0                    |
| PH-301 | -            | Chr12 | 24254687-24254938         | 1886                 | -284                     | 535         | 3, 3                       | 1, 3                         | 6                  | 3                   | 445, 109               | 122, 28                    | 323, 81                      | NA                           |          | 0                    |
| PH-302 | -            | Chr12 | 24255624-24255875         | 6326                 | -32                      | 283         | 6, 3                       | No                           | 3                  | 6                   | 613, 7                 | 613, 7                     | 0, 0                         | NA                           |          | 0                    |
| PH-304 | -            | Chr12 | 24258820-24259071         | 1245                 | -32                      | 283         | 5, 5                       | 1, 1                         | 6                  | 2                   | 178, 40                | 155, 33                    | 23, 7                        | NA                           |          | 0                    |
| PH-305 | phasi_NO1089 | Chr12 | 24260723-24260974         | 2902                 | -32                      | 283         | 7, 7                       | No                           | 7                  | 2                   | 185, 52                | 185, 52                    | 0, 0                         | NA                           |          | 0                    |
| PH-306 | -            | Chr12 | 24261531-24261782         | 1007                 | -240                     | 491         | 6, 3                       | 1, 1                         | 4                  | 4                   | 154, 16                | 15, 2                      | 139, 2                       | RFB0005;RNA_ABS001000006.L/  |          | 1                    |
| PH-307 | -            | Chr12 | 24278715-24278966         | 16933                | -171                     | 422         | 3, 3                       | No                           | 3                  | 2                   | 238, 75                | 238, 75                    | 0, 0                         | NA                           |          | 0                    |
| PH-308 | -            | Chr12 | 24283322-24283573         | 4356                 | -32                      | 304         | 3, 3                       | No                           | 3                  | 3                   | 100, 16                | 100, 16                    | 0, 0                         | LOC_Os09g24924               |          | 1                    |
| PH-309 | -            | Chr12 | 24290587-24290838         | 6994                 | -53                      | 325         | 6, 5                       | No                           | 4                  | 4                   | 427, 44                | 427, 44                    | 0, 0                         | NA                           |          | 0                    |
| PH-310 | -            | Chr12 | 24294549-24294800         | 3731                 | -242                     | 493         | 3, 1                       | No                           | 1                  | 2                   | 44, 3                  | 44, 3                      | 0, 0                         | NA                           |          | 0                    |
| PH-311 | -            | Chr12 | 24295165-24295416         | 365                  | -74                      | 325         | 5, 3                       | No                           | 5                  | 5                   | 251, 21                | 251, 21                    | 0, 0                         | NA                           |          | 0                    |
| PH-312 | -            | Chr12 | 24301557-24301808         | 6144                 | -32                      | 283         | 5, 5                       | No                           | 5                  | 2                   | 150, 30                | 150, 30                    | 0, 0                         | NA                           |          | 0                    |
| PH-313 | -            | Chr12 | 24306605-24306856         | 4797                 | -95                      | 346         | 3, 3                       | No                           | 5                  | 6                   | 1370, 124              | 112, 12                    | 1258, 112                    | NA                           |          | 0                    |
| PH-314 | -            | Chr12 | 24310773-24311024         | 3917                 | ND                       | 251         | 4, 1                       | No                           | 4                  | 4                   | 80, 3                  | 80, 3                      | 0, 0                         | NA                           |          | 0                    |
| PH-315 | -            | Chr12 | 24311891-24312142         | 867                  | -32                      | 283         | 3, 3                       | No                           | 3                  | 7                   | 845, 17                | 845, 17                    | 0, 0                         | NA                           |          | 0                    |
| PH-316 | -            | Chr12 | 24312646-24312897         | 504                  | -32                      | 283         | 7, 5                       | 1, 2                         | 6                  | 7                   | 696, 88                | 681, 83                    | 15, 5                        | NA                           |          | 0                    |
| PH-317 | -            | Chr12 | 24313377-24313628         | 480                  | -53                      | 304         | 8, 5                       | 1, 1                         | 7                  | 8                   | 405, 44                | 344, 38                    | 61, 6                        | NA                           |          | 0                    |
| PH-318 | phasi_NO1097 | Chr12 | 24315089-24315340         | 1461                 | -223                     | 474         | 10, 7                      | 2, 2                         | 11                 | 11                  | 856, 123               | 804, 115                   | 52, 8                        | LOC_Os12g39450,LOC_Os12g3941 |          | 0                    |
| PH-319 | -            | Chr12 | 24317901-24318152         | 2561                 | -32                      | 283         | 3, 2                       | No                           | 2                  | 3                   | 158, 10                | 158, 10                    | 0, 0                         | NA                           |          | 0                    |
| PH-320 | phasi_NO1098 | Chr12 | 24320131-24320382         | 1979                 | -202                     | 453         | 4, 4                       | No                           | 4                  | 4                   | 1563, 175              | 1563, 175                  | 0, 0                         | NA                           |          | 0                    |
| PH-321 | -            | Chr12 | 24323452-24323703         | 3070                 | -74                      | 325         | 2, 2                       | No                           | 2                  | 2                   | 98, 4                  | 98, 4                      | 0, 0                         | LOC_Os12g39470,LOC_Os12g3941 |          | 3                    |
| PH-322 | phasi_NO1099 | Chr12 | 24324308-24324559         | 605                  | -32                      | 283         | 4, 4                       | No                           | 4                  | 4                   | 149, 26                | 149, 26                    | 0, 0                         | LOC_Os12g39470,LOC_Os12g3941 |          | 4                    |
| PH-323 | -            | Chr12 | 24327795-24328046         | 3236                 | -32                      | 283         | 3, 3                       | No                           | 2                  | 2                   | 234, 18                | 234, 18                    | 0, 0                         | NA                           |          | 0                    |
| PH-324 | phasi_NO1100 | Chr12 | 24337794-24338045         | 9748                 | -32                      | 283         | 3, 3                       | No                           | 3                  | 3                   | 229, 25                | 229, 25                    | 0, 0                         | Rep_LOC_Os12g39490           |          | 5                    |
| PH-325 | phasi_NO1105 | Chr12 | 24351022-24351273         | 12977                | -32                      | 283         | 6, 6                       | 7, 6                         | 6                  | 6                   | 294, 26                | 294, 26                    | 0, 0                         | NA                           |          | 0                    |
| PH-326 | phasi_NO1106 | Chr12 | 24357145-24357396         | 5872                 | -74                      | 325         | 5, 2                       | 5, 3                         | 8                  | 8                   | 408, 70                | 109, 10                    | 299, 60                      | NA                           |          | 0                    |
| PH-327 | phasi_NO1107 | Chr12 | 24358237-24358488         | 841                  | -32                      | 283         | 9, 7                       | No                           | 7                  | 9                   | 2674, 315              | 2674, 315                  | 0, 0                         | osa-MIR5519                  |          | 2                    |
| PH-328 | phasi_NO1108 | Chr12 | 24370251-24370502         | 11763                | -53                      | 251         | 5, 3                       | No                           | 5                  | 5                   | 210, 11                | 210, 11                    | 0, 0                         | NA                           |          | 0                    |
| PH-329 | phasi_NO1109 | Chr12 | 24371641-24371892         | 1139                 | -242                     | 493         | 3, 3                       | 3, 2                         | 5                  | 5                   | 523, 81                | 122, 21                    | 401, 60                      | NA                           |          | 0                    |
| PH-330 | phasi_NO1110 | Chr12 | 24374520-24374771         | 2628                 | ND                       | 304         | 7, 6                       | 4, 4                         | 10                 | 8                   | 882, 147               | 674, 127                   | 208, 20                      | NA                           |          | 0                    |
| PH-331 | phasi_NO1112 | Chr12 | 24380669-24380920         | 5898                 | -32                      | 283         | 3, 3                       | No                           | 3                  | 3                   | 1217, 122              | 1217, 122                  | 0, 0                         | NA                           |          | 0                    |
| PH-332 | phasi_NO1113 | Chr12 | 24385646-24385897         | 4726                 | -53                      | 304         | 3, 3                       | No                           | 3                  | 3                   | 148, 24                | 148, 24                    | 0, 0                         | NA                           |          | 0                    |
| PH-333 | phasi_NO1115 | Chr12 | 24388051-24388302         | 2154                 | -116                     | 367         | 3, 3                       | No                           | 2                  | 3                   | 109, 26                | 109, 26                    | 0, 0                         | NA                           |          | 0                    |
| PH-334 | -            | Chr12 | 24388875-24389126         | 573</                |                          |             |                            |                              |                    |                     |                        |                            |                              |                              |          |                      |





| #MIR        | Species              | 18 | 19  | 20   | 21   | 22    | 23   | 24     | 25  | 26  | 27 | 28 | Total  | per mir | Class      |
|-------------|----------------------|----|-----|------|------|-------|------|--------|-----|-----|----|----|--------|---------|------------|
| osa-MIR1846 | <i>O. barthii</i>    | 0  | 0   | 16   | 71   | 64    | 184  | 149    | 12  | 0   | 0  | 0  | 497    |         | canonical  |
|             | <i>O. glaberrima</i> | 0  | 0   | 22   | 43   | 40    | 115  | 46     | 5   | 0   | 0  | 0  | 271    |         |            |
| osa-MIR1849 | <i>O. barthii</i>    | 0  | 0   | 0    | 3    | 0     | 0    | 0      | 0   | 0   | 0  | 0  | 3      |         | siRNA-like |
|             | <i>O. glaberrima</i> | 0  | 0   | 0    | 8    | 0     | 0    | 0      | 0   | 0   | 0  | 0  | 8      |         |            |
| osa-MIR1850 | <i>O. barthii</i>    | 0  | 0   | 0    | 12   | 41    | 6    | 75     | 8   | 0   | 0  | 0  | 142    |         | canonical  |
|             | <i>O. glaberrima</i> | 0  | 0   | 0    | 21   | 39    | 14   | 102    | 9   | 0   | 0  | 0  | 184    |         |            |
| osa-MIR1852 | <i>O. barthii</i>    | 0  | 0   | 0    | 13   | 0     | 0    | 0      | 0   | 0   | 0  | 0  | 13     |         | canonical  |
|             | <i>O. glaberrima</i> | 0  | 0   | 0    | 6    | 0     | 0    | 0      | 0   | 0   | 0  | 0  | 6      |         |            |
| osa-MIR1859 | <i>O. barthii</i>    | 21 | 59  | 397  | 562  | 14187 | 85   | 32     | 18  | 0   | 0  | 0  | 15362  |         | canonical  |
|             | <i>O. glaberrima</i> | 40 | 95  | 529  | 643  | 14822 | 93   | 35     | 13  | 0   | 0  | 0  | 16270  |         |            |
| osa-MIR1860 | <i>O. barthii</i>    | 0  | 0   | 0    | 30   | 0     | 0    | 0      | 0   | 0   | 0  | 0  | 30     |         | variant    |
|             | <i>O. glaberrima</i> | 0  | 0   | 0    | 7    | 0     | 0    | 0      | 0   | 0   | 0  | 0  | 7      |         |            |
| osa-MIR1861 | <i>O. barthii</i>    | 12 | 0   | 54   | 39   | 925   | 0    | 0      | 0   | 0   | 0  | 0  | 1030   |         | canonical  |
|             | <i>O. glaberrima</i> | 0  | 0   | 55   | 44   | 1058  | 0    | 0      | 0   | 0   | 0  | 0  | 1158   |         |            |
| osa-MIR1862 | <i>O. barthii</i>    | 49 | 288 | 1189 | 1304 | 1813  | 4328 | 115812 | 725 | 64  | 41 | 30 | 125644 |         | canonical  |
|             | <i>O. glaberrima</i> | 83 | 274 | 1442 | 1490 | 1651  | 3760 | 111770 | 784 | 57  | 34 | 29 | 121373 |         |            |
| osa-MIR1863 | <i>O. barthii</i>    | 0  | 0   | 0    | 0    | 24    | 36   | 372    | 50  | 0   | 0  | 0  | 482    |         | variant    |
|             | <i>O. glaberrima</i> | 0  | 0   | 0    | 0    | 22    | 58   | 422    | 39  | 0   | 0  | 0  | 540    |         |            |
| osa-MIR1864 | <i>O. barthii</i>    | 0  | 0   | 0    | 0    | 0     | 0    | 15     | 0   | 0   | 0  | 0  | 15     |         | siRNA-like |
|             | <i>O. glaberrima</i> | 0  | 0   | 0    | 0    | 0     | 0    | 13     | 0   | 0   | 0  | 0  | 13     |         |            |
| osa-MIR1865 | <i>O. barthii</i>    | 0  | 0   | 0    | 0    | 0     | 0    | 16     | 0   | 0   | 0  | 0  | 16     |         | variant    |
|             | <i>O. glaberrima</i> | 0  | 0   | 0    | 0    | 0     | 0    | 0      | 0   | 0   | 0  | 0  | 0      |         |            |
| osa-MIR1868 | <i>O. barthii</i>    | 0  | 8   | 0    | 0    | 0     | 11   | 35     | 0   | 0   | 0  | 0  | 54     |         | siRNA-like |
|             | <i>O. glaberrima</i> | 0  | 4   | 0    | 0    | 0     | 4    | 37     | 0   | 0   | 0  | 0  | 44     |         |            |
| osa-MIR1869 | <i>O. barthii</i>    | 0  | 0   | 0    | 0    | 10    | 0    | 30     | 0   | 0   | 0  | 0  | 39     |         | siRNA-like |
|             | <i>O. glaberrima</i> | 0  | 0   | 0    | 0    | 15    | 0    | 45     | 0   | 0   | 0  | 0  | 60     |         |            |
| osa-MIR1871 | <i>O. barthii</i>    | 0  | 0   | 0    | 0    | 0     | 11   | 160    | 25  | 0   | 0  | 0  | 195    |         | variant    |
|             | <i>O. glaberrima</i> | 0  | 0   | 0    | 0    | 0     | 12   | 162    | 15  | 0   | 0  | 0  | 189    |         |            |
| osa-MIR1872 | <i>O. barthii</i>    | 0  | 0   | 0    | 0    | 0     | 6    | 58     | 0   | 0   | 0  | 0  | 64     |         | variant    |
|             | <i>O. glaberrima</i> | 0  | 0   | 0    | 0    | 0     | 7    | 46     | 0   | 0   | 0  | 0  | 53     |         |            |
| osa-MIR1875 | <i>O. barthii</i>    | 0  | 0   | 0    | 0    | 0     | 14   | 28     | 0   | 0   | 0  | 0  | 42     |         | canonical  |
|             | <i>O. glaberrima</i> | 0  | 0   | 0    | 0    | 0     | 15   | 18     | 0   | 0   | 0  | 0  | 33     |         |            |
| osa-MIR1876 | <i>O. barthii</i>    | 3  | 0   | 10   | 11   | 16    | 33   | 1328   | 13  | 0   | 0  | 0  | 1414   |         | canonical  |
|             | <i>O. glaberrima</i> | 10 | 0   | 10   | 12   | 24    | 20   | 1458   | 13  | 0   | 0  | 0  | 1546   |         |            |
| osa-MIR1877 | <i>O. barthii</i>    | 0  | 0   | 0    | 0    | 0     | 0    | 11     | 0   | 0   | 0  | 0  | 11     |         | siRNA-like |
|             | <i>O. glaberrima</i> | 0  | 0   | 0    | 0    | 0     | 0    | 6      | 0   | 0   | 0  | 0  | 6      |         |            |
| osa-MIR1878 | <i>O. barthii</i>    | 0  | 0   | 0    | 10   | 25    | 214  | 264    | 9   | 0   | 0  | 0  | 521    |         | canonical  |
|             | <i>O. glaberrima</i> | 0  | 0   | 0    | 6    | 21    | 155  | 177    | 3   | 0   | 0  | 0  | 362    |         |            |
| osa-MIR1880 | <i>O. barthii</i>    | 0  | 0   | 0    | 0    | 0     | 6    | 0      | 0   | 0   | 0  | 0  | 6      |         | siRNA-like |
|             | <i>O. glaberrima</i> | 0  | 0   | 0    | 10   | 0     | 7    | 0      | 0   | 0   | 0  | 0  | 17     |         |            |
| osa-MIR1883 | <i>O. barthii</i>    | 0  | 0   | 0    | 27   | 42    | 169  | 1327   | 27  | 0   | 0  | 0  | 1593   |         | variant    |
|             | <i>O. glaberrima</i> | 0  | 0   | 0    | 26   | 38    | 191  | 1196   | 25  | 0   | 0  | 0  | 1475   |         |            |
| osa-MIR1884 | <i>O. barthii</i>    | 20 | 47  | 136  | 502  | 892   | 2311 | 3789   | 486 | 109 | 94 | 13 | 8398   |         | siRNA-like |
|             | <i>O. glaberrima</i> | 32 | 71  | 142  | 460  | 873   | 2080 | 3368   | 408 | 78  | 51 | 14 | 7578   |         |            |
| osa-MIR2055 | <i>O. barthii</i>    | 0  | 0   | 35   | 427  | 0     | 0    | 0      | 0   | 0   | 0  | 0  | 463    |         | siRNA-like |
|             | <i>O. glaberrima</i> | 0  | 0   | 38   | 471  | 0     | 0    | 0      | 0   | 0   | 0  | 0  | 509    |         |            |
| osa-MIR2098 | <i>O. barthii</i>    | 0  | 0   | 0    | 6    | 5     | 0    | 0      | 0   | 0   | 0  | 0  | 11     |         | variant?   |
|             | <i>O. glaberrima</i> | 0  | 0   | 0    | 11   | 7     | 0    | 0      | 0   | 0   | 0  | 0  | 18     |         |            |
| osa-MIR2106 | <i>O. barthii</i>    | 0  | 0   | 0    | 0    | 0     | 0    | 0      | 12  | 0   | 0  | 0  | 12     |         | canonical  |
|             | <i>O. glaberrima</i> | 0  | 0   | 0    | 0    | 0     | 0    | 0      | 7   | 0   | 0  | 0  | 7      |         |            |
| osa-MIR2118 | <i>O. barthii</i>    | 0  | 0   | 0    | 228  | 4847  | 0    | 0      | 0   | 0   | 0  | 0  | 5075   |         | canonical  |
|             | <i>O. glaberrima</i> | 0  | 0   | 0    | 74   | 1440  | 0    | 0      | 0   | 0   | 0  | 0  | 1514   |         |            |
| osa-MIR2120 | <i>O. barthii</i>    | 0  | 0   | 5    | 0    | 0     | 16   | 93     | 0   | 0   | 0  | 0  | 114    |         | siRNA-like |
|             | <i>O. glaberrima</i> | 0  | 0   | 6    | 0    | 0     | 16   | 81     | 0   | 0   | 0  | 0  | 103    |         |            |
| osa-MIR2121 | <i>O. barthii</i>    | 0  | 0   | 5    | 9    | 0     | 15   | 1394   | 0   | 0   | 0  | 0  | 1423   |         | siRNA-like |
|             | <i>O. glaberrima</i> | 0  | 0   | 7    | 6    | 0     | 8    | 1336   | 0   | 0   | 0  | 0  | 1357   |         |            |

| #MIR        | Species              | 18 | 19  | 20   | 21   | 22   | 23  | 24  | 25 | 26 | 27 | 28 | Total | per mir | Class      |
|-------------|----------------------|----|-----|------|------|------|-----|-----|----|----|----|----|-------|---------|------------|
| osa-MIR2124 | <i>O. barthii</i>    | 0  | 0   | 0    | 0    | 0    | 0   | 71  | 0  | 0  | 0  | 0  | 71    |         | siRNA-like |
|             | <i>O. glaberrima</i> | 0  | 0   | 0    | 0    | 0    | 0   | 86  | 0  | 0  | 0  | 0  | 86    |         |            |
| osa-MIR2125 | <i>O. barthii</i>    | 25 | 19  | 30   | 28   | 109  | 11  | 462 | 19 | 0  | 0  | 0  | 703   |         | siRNA-like |
|             | <i>O. glaberrima</i> | 38 | 14  | 47   | 24   | 89   | 17  | 419 | 11 | 0  | 0  | 0  | 658   |         |            |
| osa-MIR2275 | <i>O. barthii</i>    | 0  | 0   | 38   | 138  | 1430 | 0   | 0   | 0  | 0  | 0  | 0  | 1606  |         | canonical  |
|             | <i>O. glaberrima</i> | 0  | 0   | 0    | 4    | 29   | 0   | 0   | 0  | 0  | 0  | 0  | 33    |         |            |
| osa-MIR2862 | <i>O. barthii</i>    | 0  | 0   | 0    | 0    | 0    | 0   | 34  | 0  | 0  | 0  | 0  | 34    |         | siRNA-like |
|             | <i>O. glaberrima</i> | 0  | 0   | 0    | 0    | 0    | 0   | 17  | 0  | 0  | 0  | 0  | 17    |         |            |
| osa-MIR2863 | <i>O. barthii</i>    | 0  | 0   | 0    | 21   | 0    | 0   | 18  | 0  | 0  | 0  | 0  | 39    |         | siRNA-like |
|             | <i>O. glaberrima</i> | 0  | 0   | 0    | 11   | 0    | 0   | 15  | 0  | 0  | 0  | 0  | 26    |         |            |
| osa-MIR2867 | <i>O. barthii</i>    | 0  | 0   | 0    | 8    | 0    | 0   | 0   | 0  | 0  | 0  | 0  | 8     |         | variant    |
|             | <i>O. glaberrima</i> | 0  | 0   | 0    | 6    | 0    | 0   | 0   | 0  | 0  | 0  | 0  | 6     |         |            |
| osa-MIR2871 | <i>O. barthii</i>    | 0  | 11  | 10   | 220  | 5    | 0   | 0   | 20 | 0  | 0  | 0  | 246   |         | variant    |
|             | <i>O. glaberrima</i> | 0  | 8   | 13   | 311  | 8    | 0   | 0   | 0  | 0  | 0  | 0  | 340   |         |            |
| osa-MIR2872 | <i>O. barthii</i>    | 0  | 0   | 0    | 0    | 0    | 0   | 26  | 0  | 0  | 0  | 0  | 26    |         | siRNA-like |
|             | <i>O. glaberrima</i> | 0  | 0   | 0    | 0    | 0    | 0   | 26  | 0  | 0  | 0  | 0  | 26    |         |            |
| osa-MIR2873 | <i>O. barthii</i>    | 0  | 0   | 0    | 147  | 7    | 0   | 135 | 0  | 0  | 0  | 0  | 289   |         | siRNA-like |
|             | <i>O. glaberrima</i> | 0  | 0   | 0    | 81   | 12   | 12  | 134 | 0  | 0  | 0  | 0  | 239   |         |            |
| osa-MIR2874 | <i>O. barthii</i>    | 0  | 0   | 0    | 0    | 0    | 0   | 74  | 4  | 0  | 0  | 0  | 78    |         | canonical  |
|             | <i>O. glaberrima</i> | 0  | 0   | 0    | 0    | 0    | 0   | 81  | 9  | 0  | 0  | 0  | 90    |         |            |
| osa-MIR2877 | <i>O. barthii</i>    | 0  | 0   | 0    | 6    | 10   | 9   | 44  | 0  | 0  | 0  | 0  | 68    |         | canonical  |
|             | <i>O. glaberrima</i> | 0  | 0   | 0    | 9    | 7    | 3   | 54  | 0  | 0  | 0  | 0  | 73    |         |            |
| osa-MIR2879 | <i>O. barthii</i>    | 0  | 0   | 0    | 0    | 0    | 0   | 58  | 0  | 0  | 0  | 0  | 58    |         | canonical  |
|             | <i>O. glaberrima</i> | 0  | 0   | 0    | 0    | 0    | 0   | 38  | 0  | 0  | 0  | 0  | 38    |         |            |
| osa-MIR2880 | <i>O. barthii</i>    | 0  | 0   | 0    | 5    | 0    | 0   | 451 | 0  | 0  | 0  | 0  | 456   |         | siRNA-like |
|             | <i>O. glaberrima</i> | 0  | 0   | 0    | 7    | 0    | 0   | 409 | 0  | 0  | 0  | 0  | 416   |         |            |
| osa-MIR2905 | <i>O. barthii</i>    | 0  | 0   | 0    | 0    | 0    | 0   | 491 | 0  | 0  | 0  | 0  | 491   |         | siRNA-like |
|             | <i>O. glaberrima</i> | 0  | 0   | 0    | 0    | 0    | 0   | 527 | 0  | 0  | 0  | 0  | 527   |         |            |
| osa-MIR390  | <i>O. barthii</i>    | 11 | 13  | 42   | 1240 | 0    | 0   | 35  | 0  | 0  | 0  | 0  | 1342  |         | canonical  |
|             | <i>O. glaberrima</i> | 8  | 10  | 53   | 1152 | 0    | 0   | 23  | 0  | 0  | 0  | 0  | 1246  |         |            |
| osa-MIR393  | <i>O. barthii</i>    | 15 | 6   | 65   | 257  | 0    | 0   | 0   | 0  | 0  | 0  | 0  | 343   |         | canonical  |
|             | <i>O. glaberrima</i> | 24 | 6   | 103  | 410  | 0    | 0   | 0   | 0  | 0  | 0  | 0  | 542   |         |            |
| osa-MIR394  | <i>O. barthii</i>    | 19 | 149 | 5661 | 349  | 44   | 65  | 39  | 12 | 0  | 0  | 0  | 6339  |         | canonical  |
|             | <i>O. glaberrima</i> | 40 | 227 | 8629 | 496  | 69   | 116 | 91  | 14 | 0  | 0  | 0  | 9682  |         |            |
| osa-MIR395  | <i>O. barthii</i>    | 0  | 0   | 192  | 0    | 0    | 0   | 0   | 0  | 0  | 0  | 0  | 192   |         | canonical  |
|             | <i>O. glaberrima</i> | 0  | 0   | 209  | 10   | 0    | 0   | 0   | 0  | 0  | 0  | 0  | 219   |         |            |
| osa-MIR396  | <i>O. barthii</i>    | 11 | 34  | 132  | 4627 | 36   | 0   | 0   | 0  | 0  | 0  | 0  | 4840  |         | variant    |
|             | <i>O. glaberrima</i> | 4  | 25  | 109  | 3761 | 26   | 0   | 0   | 0  | 0  | 0  | 0  | 3924  |         |            |
| osa-MIR397  | <i>O. barthii</i>    | 0  | 0   | 11   | 255  | 76   | 0   | 0   | 0  | 0  | 0  | 0  | 341   |         | canonical  |
|             | <i>O. glaberrima</i> | 0  | 0   | 11   | 182  | 57   | 0   | 0   | 0  | 0  | 0  | 0  | 250   |         |            |
| osa-MIR3979 | <i>O. barthii</i>    | 0  | 0   | 92   | 24   | 0    | 0   | 0   | 0  | 0  | 0  | 0  | 116   |         | canonical  |
|             | <i>O. glaberrima</i> | 0  | 0   | 144  | 23   | 0    | 0   | 0   | 0  | 0  | 0  | 0  | 167   |         |            |
| osa-MIR3981 | <i>O. barthii</i>    | 0  | 0   | 0    | 0    | 0    | 0   | 6   | 0  | 0  | 0  | 0  | 6     |         | siRNA-like |
|             | <i>O. glaberrima</i> | 0  | 0   | 0    | 0    | 0    | 0   | 5   | 0  | 0  | 0  | 0  | 5     |         |            |
| osa-MIR399  | <i>O. barthii</i>    | 0  | 0   | 10   | 98   | 0    | 0   | 0   | 0  | 0  | 0  | 0  | 107   |         | canonical  |
|             | <i>O. glaberrima</i> | 0  | 0   | 12   | 109  | 0    | 0   | 0   | 0  | 0  | 0  | 0  | 121   |         |            |
| osa-MIR408  | <i>O. barthii</i>    | 0  | 0   | 10   | 55   | 0    | 0   | 0   | 0  | 0  | 0  | 0  | 64    |         | canonical  |
|             | <i>O. glaberrima</i> | 0  | 0   | 11   | 73   | 0    | 0   | 0   | 0  | 0  | 0  | 0  | 84    |         |            |
| osa-MIR419  | <i>O. barthii</i>    | 0  | 0   | 0    | 0    | 0    | 0   | 11  | 0  | 0  | 0  | 0  | 11    |         | canonical  |
|             | <i>O. glaberrima</i> | 0  | 0   | 0    | 0    | 0    | 0   | 7   | 0  | 0  | 0  | 0  | 7     |         |            |
| osa-MIR435  | <i>O. barthii</i>    | 0  | 0   | 0    | 11   | 55   | 0   | 12  | 0  | 0  | 0  | 0  | 78    |         | canonical  |
|             | <i>O. glaberrima</i> | 0  | 0   | 0    | 14   | 77   | 0   | 3   | 0  | 0  | 0  | 0  | 94    |         |            |
| osa-MIR437  | <i>O. barthii</i>    | 0  | 0   | 0    | 3    | 0    | 0   | 370 | 0  | 0  | 0  | 0  | 373   |         | variant    |
|             | <i>O. glaberrima</i> | 0  | 0   | 0    | 9    | 0    | 0   | 353 | 0  | 0  | 0  | 0  | 362   |         |            |
| osa-MIR439  | <i>O. barthii</i>    | 0  | 0   | 0    | 0    | 0    | 0   | 13  | 0  | 0  | 0  | 0  | 13    |         | siRNA-like |
|             | <i>O. glaberrima</i> | 0  | 0   | 0    | 0    | 0    | 0   | 10  | 0  | 0  | 0  | 0  | 10    |         |            |

| #MIR        | Species              | 18  | 19   | 20   | 21     | 22  | 23  | 24   | 25 | 26 | 27 | 28 | Total  | per mir | Class      |
|-------------|----------------------|-----|------|------|--------|-----|-----|------|----|----|----|----|--------|---------|------------|
| osa-MIR441  | <i>O. barthii</i>    | 0   | 0    | 0    | 5      | 0   | 34  | 1195 | 0  | 0  | 0  | 0  | 1234   |         | siRNA-like |
|             | <i>O. glaberrima</i> | 0   | 0    | 0    | 7      | 0   | 35  | 983  | 0  | 0  | 0  | 0  | 1024   |         |            |
| osa-MIR442  | <i>O. barthii</i>    | 0   | 0    | 0    | 14     | 0   | 41  | 54   | 0  | 0  | 0  | 0  | 109    |         | siRNA-like |
|             | <i>O. glaberrima</i> | 0   | 0    | 0    | 11     | 0   | 29  | 54   | 0  | 0  | 0  | 0  | 94     |         |            |
| osa-MIR443  | <i>O. barthii</i>    | 0   | 0    | 0    | 0      | 0   | 9   | 25   | 0  | 0  | 0  | 0  | 34     |         | siRNA-like |
|             | <i>O. glaberrima</i> | 0   | 0    | 0    | 0      | 0   | 15  | 35   | 0  | 0  | 0  | 0  | 49     |         |            |
| osa-MIR444  | <i>O. barthii</i>    | 9   | 36   | 57   | 2483   | 14  | 0   | 0    | 0  | 0  | 0  | 0  | 2600   |         | canonical  |
|             | <i>O. glaberrima</i> | 20  | 64   | 96   | 3575   | 26  | 0   | 0    | 0  | 0  | 0  | 0  | 3780   |         |            |
| osa-MIR445  | <i>O. barthii</i>    | 0   | 0    | 0    | 0      | 0   | 5   | 146  | 0  | 0  | 0  | 0  | 150    |         | siRNA-like |
|             | <i>O. glaberrima</i> | 0   | 0    | 0    | 0      | 0   | 8   | 141  | 0  | 0  | 0  | 0  | 149    |         |            |
| osa-MIR5072 | <i>O. barthii</i>    | 14  | 441  | 290  | 490    | 140 | 172 | 0    | 0  | 0  | 0  | 0  | 1548   |         | siRNA-like |
|             | <i>O. glaberrima</i> | 17  | 623  | 507  | 947    | 312 | 293 | 0    | 0  | 0  | 0  | 0  | 2699   |         |            |
| osa-MIR5073 | <i>O. barthii</i>    | 0   | 0    | 0    | 0      | 0   | 0   | 0    | 0  | 13 | 0  | 0  | 13     |         | siRNA-like |
|             | <i>O. glaberrima</i> | 0   | 0    | 0    | 0      | 0   | 0   | 0    | 0  | 8  | 0  | 0  | 8      |         |            |
| osa-MIR5076 | <i>O. barthii</i>    | 0   | 27   | 0    | 0      | 0   | 0   | 0    | 0  | 0  | 0  | 0  | 27     |         | canonical  |
|             | <i>O. glaberrima</i> | 0   | 0    | 0    | 0      | 0   | 0   | 0    | 0  | 0  | 0  | 0  | 0      |         |            |
| osa-MIR5083 | <i>O. barthii</i>    | 10  | 200  | 65   | 122    | 336 | 617 | 72   | 5  | 0  | 0  | 0  | 1426   |         | canonical  |
|             | <i>O. glaberrima</i> | 27  | 256  | 92   | 141    | 292 | 846 | 84   | 7  | 0  | 0  | 0  | 1744   |         |            |
| osa-MIR5143 | <i>O. barthii</i>    | 0   | 0    | 0    | 0      | 0   | 0   | 7    | 0  | 0  | 0  | 0  | 7      |         | variant    |
|             | <i>O. glaberrima</i> | 0   | 0    | 0    | 0      | 0   | 0   | 5    | 0  | 0  | 0  | 0  | 5      |         |            |
| osa-MIR5145 | <i>O. barthii</i>    | 0   | 0    | 0    | 46     | 0   | 15  | 617  | 10 | 0  | 0  | 0  | 688    |         | siRNA-like |
|             | <i>O. glaberrima</i> | 0   | 0    | 0    | 9      | 0   | 7   | 386  | 7  | 0  | 0  | 0  | 409    |         |            |
| osa-MIR5146 | <i>O. barthii</i>    | 0   | 0    | 0    | 0      | 0   | 0   | 11   | 0  | 0  | 0  | 0  | 11     |         | canonical  |
|             | <i>O. glaberrima</i> | 0   | 0    | 0    | 0      | 0   | 0   | 0    | 0  | 0  | 0  | 0  | 0      |         |            |
| osa-MIR5148 | <i>O. barthii</i>    | 0   | 0    | 0    | 0      | 39  | 76  | 249  | 6  | 0  | 0  | 0  | 370    |         | siRNA-like |
|             | <i>O. glaberrima</i> | 0   | 0    | 0    | 0      | 34  | 73  | 297  | 5  | 0  | 0  | 0  | 409    |         |            |
| osa-MIR5149 | <i>O. barthii</i>    | 0   | 0    | 0    | 0      | 0   | 5   | 377  | 0  | 0  | 0  | 0  | 382    |         | siRNA-like |
|             | <i>O. glaberrima</i> | 0   | 0    | 0    | 0      | 0   | 8   | 294  | 0  | 0  | 0  | 0  | 302    |         |            |
| osa-MIR5150 | <i>O. barthii</i>    | 0   | 0    | 0    | 0      | 0   | 0   | 251  | 4  | 0  | 0  | 0  | 255    |         | siRNA-like |
|             | <i>O. glaberrima</i> | 0   | 0    | 0    | 0      | 0   | 0   | 200  | 8  | 0  | 0  | 0  | 207    |         |            |
| osa-MIR5151 | <i>O. barthii</i>    | 0   | 0    | 0    | 0      | 11  | 0   | 0    | 0  | 0  | 0  | 0  | 11     |         | siRNA-like |
|             | <i>O. glaberrima</i> | 0   | 0    | 0    | 0      | 2   | 0   | 0    | 0  | 0  | 0  | 0  | 2      |         |            |
| osa-MIR5153 | <i>O. barthii</i>    | 0   | 0    | 0    | 0      | 9   | 0   | 210  | 11 | 0  | 0  | 0  | 230    |         | siRNA-like |
|             | <i>O. glaberrima</i> | 0   | 0    | 0    | 0      | 4   | 0   | 232  | 8  | 0  | 0  | 0  | 244    |         |            |
| osa-MIR5154 | <i>O. barthii</i>    | 0   | 0    | 0    | 0      | 0   | 0   | 35   | 0  | 0  | 0  | 0  | 35     |         | siRNA-like |
|             | <i>O. glaberrima</i> | 0   | 0    | 0    | 0      | 0   | 0   | 46   | 0  | 0  | 0  | 0  | 46     |         |            |
| osa-MIR5155 | <i>O. barthii</i>    | 0   | 0    | 0    | 0      | 0   | 0   | 18   | 0  | 0  | 0  | 0  | 18     |         | canonical  |
|             | <i>O. glaberrima</i> | 0   | 0    | 0    | 0      | 0   | 0   | 17   | 0  | 0  | 0  | 0  | 17     |         |            |
| osa-MIR5159 | <i>O. barthii</i>    | 0   | 0    | 0    | 2      | 0   | 6   | 126  | 0  | 0  | 0  | 0  | 134    |         | canonical  |
|             | <i>O. glaberrima</i> | 0   | 0    | 0    | 10     | 0   | 12  | 181  | 0  | 0  | 0  | 0  | 202    |         |            |
| osa-MIR5160 | <i>O. barthii</i>    | 0   | 0    | 0    | 0      | 6   | 0   | 21   | 0  | 0  | 0  | 0  | 27     |         | siRNA-like |
|             | <i>O. glaberrima</i> | 0   | 0    | 0    | 0      | 5   | 0   | 22   | 0  | 0  | 0  | 0  | 27     |         |            |
| osa-MIR5161 | <i>O. barthii</i>    | 0   | 0    | 10   | 0      | 0   | 0   | 0    | 0  | 0  | 0  | 0  | 10     |         | siRNA-like |
|             | <i>O. glaberrima</i> | 0   | 0    | 11   | 0      | 0   | 0   | 0    | 0  | 0  | 0  | 0  | 11     |         |            |
| osa-MIR528  | <i>O. barthii</i>    | 30  | 344  | 99   | 5540   | 0   | 0   | 0    | 0  | 0  | 0  | 0  | 6012   |         | canonical  |
|             | <i>O. glaberrima</i> | 17  | 206  | 59   | 3211   | 0   | 0   | 0    | 0  | 0  | 0  | 0  | 3494   |         |            |
| osa-MIR529  | <i>O. barthii</i>    | 0   | 12   | 42   | 1688   | 13  | 0   | 0    | 0  | 0  | 0  | 0  | 1756   |         | canonical  |
|             | <i>O. glaberrima</i> | 0   | 8    | 46   | 1561   | 14  | 0   | 0    | 0  | 0  | 0  | 0  | 1629   |         |            |
| osa-MIR530  | <i>O. barthii</i>    | 0   | 0    | 0    | 10     | 0   | 0   | 0    | 0  | 0  | 0  | 0  | 10     |         | canonical  |
|             | <i>O. glaberrima</i> | 0   | 0    | 0    | 11     | 0   | 0   | 0    | 0  | 0  | 0  | 0  | 11     |         |            |
| osa-MIR5337 | <i>O. barthii</i>    | 0   | 0    | 0    | 0      | 0   | 0   | 21   | 0  | 0  | 0  | 0  | 21     |         | siRNA-like |
|             | <i>O. glaberrima</i> | 0   | 0    | 0    | 0      | 0   | 0   | 23   | 0  | 0  | 0  | 0  | 23     |         |            |
| osa-MIR5340 | <i>O. barthii</i>    | 0   | 0    | 0    | 0      | 0   | 0   | 39   | 0  | 0  | 0  | 0  | 39     |         | siRNA-like |
|             | <i>O. glaberrima</i> | 0   | 0    | 0    | 0      | 0   | 0   | 64   | 0  | 0  | 0  | 0  | 64     |         |            |
| osa-MIR535  | <i>O. barthii</i>    | 466 | 1051 | 2484 | 122449 | 83  | 52  | 102  | 74 | 16 | 0  | 0  | 126777 |         | canonical  |
|             | <i>O. glaberrima</i> | 417 | 968  | 2614 | 110440 | 66  | 38  | 75   | 60 | 21 | 0  | 0  | 114698 |         |            |

| #MIR        | Species              | 18 | 19 | 20  | 21   | 22  | 23   | 24    | 25  | 26 | 27 | 28 | Total | per_mir | Class      |
|-------------|----------------------|----|----|-----|------|-----|------|-------|-----|----|----|----|-------|---------|------------|
| osa-MIR5486 | <i>O. barthii</i>    | 0  | 0  | 0   | 9    | 0   | 0    | 0     | 0   | 0  | 0  | 0  | 9     |         | siRNA-like |
|             | <i>O. glaberrima</i> | 0  | 0  | 0   | 5    | 0   | 0    | 0     | 0   | 0  | 0  | 0  | 5     |         |            |
| osa-MIR5488 | <i>O. barthii</i>    | 0  | 0  | 0   | 18   | 0   | 0    | 0     | 0   | 0  | 0  | 0  | 18    |         | canonical  |
|             | <i>O. glaberrima</i> | 0  | 0  | 0   | 0    | 0   | 0    | 0     | 0   | 0  | 0  | 0  | 0     |         |            |
| osa-MIR5490 | <i>O. barthii</i>    | 0  | 0  | 0   | 0    | 0   | 0    | 8     | 0   | 0  | 0  | 0  | 8     |         | siRNA-like |
|             | <i>O. glaberrima</i> | 0  | 0  | 0   | 0    | 0   | 0    | 21    | 0   | 0  | 0  | 0  | 21    |         |            |
| osa-MIR5495 | <i>O. barthii</i>    | 0  | 0  | 8   | 348  | 0   | 0    | 0     | 0   | 0  | 0  | 0  | 355   |         | canonical  |
|             | <i>O. glaberrima</i> | 0  | 0  | 3   | 99   | 0   | 0    | 0     | 0   | 0  | 0  | 0  | 102   |         |            |
| osa-MIR5497 | <i>O. barthii</i>    | 0  | 21 | 0   | 424  | 0   | 0    | 0     | 0   | 0  | 0  | 0  | 445   |         | canonical  |
|             | <i>O. glaberrima</i> | 0  | 0  | 0   | 41   | 0   | 0    | 0     | 0   | 0  | 0  | 0  | 41    |         |            |
| osa-MIR5498 | <i>O. barthii</i>    | 0  | 0  | 0   | 0    | 0   | 0    | 12    | 0   | 0  | 0  | 0  | 12    |         | canonical  |
|             | <i>O. glaberrima</i> | 0  | 0  | 0   | 0    | 0   | 0    | 17    | 0   | 0  | 0  | 0  | 17    |         |            |
| osa-MIR5500 | <i>O. barthii</i>    | 0  | 0  | 0   | 0    | 0   | 0    | 7     | 0   | 0  | 0  | 0  | 7     |         | canonical  |
|             | <i>O. glaberrima</i> | 0  | 0  | 0   | 0    | 0   | 0    | 6     | 0   | 0  | 0  | 0  | 6     |         |            |
| osa-MIR5502 | <i>O. barthii</i>    | 0  | 0  | 0   | 0    | 0   | 0    | 5     | 0   | 0  | 0  | 0  | 5     |         | canonical  |
|             | <i>O. glaberrima</i> | 0  | 0  | 0   | 0    | 0   | 0    | 13    | 0   | 0  | 0  | 0  | 13    |         |            |
| osa-MIR5505 | <i>O. barthii</i>    | 0  | 11 | 11  | 0    | 0   | 0    | 0     | 0   | 0  | 0  | 0  | 22    |         | variant    |
|             | <i>O. glaberrima</i> | 0  | 7  | 7   | 0    | 0   | 0    | 0     | 0   | 0  | 0  | 0  | 14    |         |            |
| osa-MIR5508 | <i>O. barthii</i>    | 0  | 0  | 0   | 11   | 0   | 0    | 22    | 0   | 0  | 0  | 0  | 33    |         | canonical  |
|             | <i>O. glaberrima</i> | 0  | 0  | 0   | 15   | 0   | 0    | 14    | 0   | 0  | 0  | 0  | 29    |         |            |
| osa-MIR5514 | <i>O. barthii</i>    | 0  | 0  | 0   | 27   | 0   | 0    | 0     | 0   | 0  | 0  | 0  | 27    |         | variant    |
|             | <i>O. glaberrima</i> | 0  | 0  | 0   | 2    | 0   | 0    | 0     | 0   | 0  | 0  | 0  | 2     |         |            |
| osa-MIR5516 | <i>O. barthii</i>    | 0  | 0  | 0   | 151  | 0   | 0    | 0     | 0   | 0  | 0  | 0  | 151   |         | canonical  |
|             | <i>O. glaberrima</i> | 0  | 0  | 0   | 6    | 0   | 0    | 0     | 0   | 0  | 0  | 0  | 6     |         |            |
| osa-MIR5517 | <i>O. barthii</i>    | 0  | 0  | 0   | 32   | 0   | 0    | 0     | 0   | 0  | 0  | 0  | 32    |         | canonical  |
|             | <i>O. glaberrima</i> | 0  | 0  | 0   | 3    | 0   | 0    | 0     | 0   | 0  | 0  | 0  | 3     |         |            |
| osa-MIR5519 | <i>O. barthii</i>    | 0  | 0  | 11  | 1097 | 0   | 0    | 0     | 0   | 0  | 0  | 0  | 1109  |         | canonical  |
|             | <i>O. glaberrima</i> | 0  | 0  | 2   | 133  | 0   | 0    | 0     | 0   | 0  | 0  | 0  | 135   |         |            |
| osa-MIR5522 | <i>O. barthii</i>    | 0  | 0  | 0   | 0    | 0   | 0    | 0     | 26  | 0  | 0  | 0  | 26    |         | siRNA-like |
|             | <i>O. glaberrima</i> | 0  | 0  | 0   | 0    | 0   | 0    | 0     | 19  | 0  | 0  | 0  | 19    |         |            |
| osa-MIR5526 | <i>O. barthii</i>    | 0  | 0  | 0   | 0    | 11  | 134  | 1435  | 19  | 0  | 0  | 0  | 1599  |         | siRNA-like |
|             | <i>O. glaberrima</i> | 0  | 0  | 0   | 0    | 9   | 101  | 1243  | 12  | 0  | 0  | 0  | 1364  |         |            |
| osa-MIR5529 | <i>O. barthii</i>    | 0  | 0  | 0   | 34   | 0   | 0    | 0     | 0   | 0  | 0  | 0  | 34    |         | variant    |
|             | <i>O. glaberrima</i> | 0  | 0  | 0   | 6    | 0   | 0    | 0     | 0   | 0  | 0  | 0  | 6     |         |            |
| osa-MIR5532 | <i>O. barthii</i>    | 0  | 0  | 0   | 0    | 0   | 0    | 8     | 0   | 0  | 0  | 0  | 8     |         | siRNA-like |
|             | <i>O. glaberrima</i> | 0  | 0  | 0   | 0    | 0   | 0    | 17    | 0   | 0  | 0  | 0  | 17    |         |            |
| osa-MIR5533 | <i>O. barthii</i>    | 0  | 0  | 0   | 0    | 0   | 0    | 7     | 0   | 0  | 0  | 0  | 7     |         | siRNA-like |
|             | <i>O. glaberrima</i> | 0  | 0  | 0   | 0    | 0   | 0    | 9     | 0   | 0  | 0  | 0  | 9     |         |            |
| osa-MIR5534 | <i>O. barthii</i>    | 0  | 0  | 0   | 0    | 0   | 0    | 12    | 0   | 0  | 0  | 0  | 12    |         | siRNA-like |
|             | <i>O. glaberrima</i> | 0  | 0  | 0   | 0    | 0   | 0    | 0     | 0   | 0  | 0  | 0  | 0     |         |            |
| osa-MIR5536 | <i>O. barthii</i>    | 0  | 0  | 0   | 0    | 18  | 28   | 408   | 0   | 0  | 0  | 0  | 454   |         | siRNA-like |
|             | <i>O. glaberrima</i> | 0  | 0  | 0   | 0    | 21  | 24   | 328   | 0   | 0  | 0  | 0  | 372   |         |            |
| osa-MIR5537 | <i>O. barthii</i>    | 0  | 0  | 0   | 0    | 0   | 0    | 4     | 0   | 0  | 0  | 0  | 4     |         | siRNA-like |
|             | <i>O. glaberrima</i> | 0  | 0  | 0   | 0    | 0   | 0    | 10    | 0   | 0  | 0  | 0  | 10    |         |            |
| osa-MIR5540 | <i>O. barthii</i>    | 0  | 0  | 0   | 0    | 0   | 0    | 35    | 0   | 0  | 0  | 0  | 35    |         | siRNA-like |
|             | <i>O. glaberrima</i> | 0  | 0  | 0   | 0    | 0   | 0    | 32    | 0   | 0  | 0  | 0  | 32    |         |            |
| osa-MIR806  | <i>O. barthii</i>    | 0  | 0  | 24  | 59   | 130 | 188  | 4813  | 43  | 0  | 0  | 0  | 5257  |         | siRNA-like |
|             | <i>O. glaberrima</i> | 0  | 0  | 36  | 58   | 129 | 179  | 4924  | 78  | 0  | 0  | 0  | 5404  |         |            |
| osa-MIR807  | <i>O. barthii</i>    | 0  | 0  | 0   | 14   | 0   | 5    | 75    | 0   | 0  | 0  | 0  | 94    |         | siRNA-like |
|             | <i>O. glaberrima</i> | 0  | 0  | 0   | 4    | 0   | 6    | 70    | 0   | 0  | 0  | 0  | 80    |         |            |
| osa-MIR808  | <i>O. barthii</i>    | 12 | 27 | 168 | 201  | 283 | 1469 | 34416 | 396 | 0  | 21 | 0  | 36994 |         | siRNA-like |
|             | <i>O. glaberrima</i> | 23 | 32 | 182 | 184  | 236 | 1300 | 30364 | 330 | 0  | 26 | 0  | 32675 |         |            |
| osa-MIR810  | <i>O. barthii</i>    | 0  | 0  | 0   | 11   | 0   | 0    | 0     | 0   | 0  | 0  | 0  | 11    |         | variant    |
|             | <i>O. glaberrima</i> | 0  | 0  | 0   | 23   | 0   | 0    | 0     | 0   | 0  | 0  | 0  | 23    |         |            |
| osa-MIR811  | <i>O. barthii</i>    | 0  | 0  | 8   | 11   | 11  | 67   | 1145  | 29  | 0  | 0  | 0  | 1271  |         | siRNA-like |
|             | <i>O. glaberrima</i> | 0  | 0  | 3   | 14   | 9   | 37   | 939   | 25  | 0  | 0  | 0  | 1026  |         |            |

| #MIR           | Species              | 18   | 19    | 20     | 21      | 22    | 23    | 24     | 25   | 26  | 27  | 28  | Total_per_mir | Class      |
|----------------|----------------------|------|-------|--------|---------|-------|-------|--------|------|-----|-----|-----|---------------|------------|
| osa-MIR812     | <i>O. barthii</i>    | 0    | 24    | 67     | 88      | 387   | 1232  | 41480  | 305  | 0   | 0   | 0   | 43584         | siRNA-like |
|                | <i>O. glaberrima</i> | 0    | 21    | 80     | 99      | 395   | 1163  | 35874  | 230  | 0   | 0   | 0   | 37862         |            |
| osa-MIR813     | <i>O. barthii</i>    | 0    | 0     | 0      | 0       | 0     | 0     | 40     | 0    | 0   | 0   | 0   | 40            | siRNA-like |
|                | <i>O. glaberrima</i> | 0    | 0     | 0      | 0       | 0     | 0     | 56     | 0    | 0   | 0   | 0   | 56            |            |
| osa-MIR814     | <i>O. barthii</i>    | 0    | 0     | 8      | 8       | 41    | 59    | 1523   | 0    | 0   | 0   | 0   | 1638          | siRNA-like |
|                | <i>O. glaberrima</i> | 0    | 0     | 6      | 9       | 30    | 33    | 1162   | 0    | 0   | 0   | 0   | 1239          |            |
| osa-MIR815     | <i>O. barthii</i>    | 0    | 0     | 0      | 0       | 60    | 861   | 5434   | 229  | 0   | 0   | 0   | 6585          | siRNA-like |
|                | <i>O. glaberrima</i> | 0    | 0     | 0      | 0       | 50    | 464   | 4160   | 198  | 0   | 0   | 0   | 4872          |            |
| osa-MIR816     | <i>O. barthii</i>    | 0    | 0     | 0      | 0       | 0     | 0     | 25     | 0    | 0   | 0   | 0   | 25            | siRNA-like |
|                | <i>O. glaberrima</i> | 0    | 0     | 0      | 0       | 0     | 0     | 28     | 0    | 0   | 0   | 0   | 28            |            |
| osa-MIR817     | <i>O. barthii</i>    | 0    | 0     | 0      | 0       | 0     | 0     | 129    | 0    | 0   | 0   | 0   | 129           | siRNA-like |
|                | <i>O. glaberrima</i> | 0    | 0     | 0      | 0       | 0     | 0     | 115    | 0    | 0   | 0   | 0   | 115           |            |
| osa-MIR818     | <i>O. barthii</i>    | 0    | 0     | 0      | 0       | 0     | 0     | 26     | 0    | 0   | 0   | 0   | 26            | siRNA-like |
|                | <i>O. glaberrima</i> | 0    | 0     | 0      | 0       | 0     | 0     | 15     | 0    | 0   | 0   | 0   | 15            |            |
| osa-MIR820     | <i>O. barthii</i>    | 13   | 388   | 373    | 1973    | 2848  | 1093  | 52220  | 320  | 40  | 36  | 127 | 59431         | canonical  |
|                | <i>O. glaberrima</i> | 3    | 391   | 335    | 1956    | 2550  | 853   | 43166  | 238  | 33  | 53  | 172 | 49750         |            |
| osa-MIR827     | <i>O. barthii</i>    | 0    | 0     | 0      | 79      | 0     | 0     | 0      | 0    | 0   | 0   | 0   | 79            | siRNA-like |
|                | <i>O. glaberrima</i> | 0    | 0     | 0      | 49      | 0     | 0     | 0      | 0    | 0   | 0   | 0   | 49            |            |
| Total per size | <i>O. barthii</i>    | 7741 | 35435 | 211769 | 1343133 | 92156 | 23372 | 280606 | 4572 | 573 | 441 | 202 | 2000000       |            |
|                | <i>O. glaberrima</i> | 9244 | 39228 | 224281 | 1353772 | 88921 | 23646 | 255283 | 4429 | 560 | 405 | 231 | 2000000       |            |
