# Supplementary material for: miR2118-triggered phased siRNAs are differentially expressed during the panicle development of wild and domesticated African rice species
Source: PubMed Central journal article supplement (PMC4788661; doi:10.1186/s12284-016-0082-9), 2016-03-12
Supplement: 12284_2016_82_MOESM12_ESM.pdf [file 12284_2016_82_MOESM12_ESM.pdf]

(a)

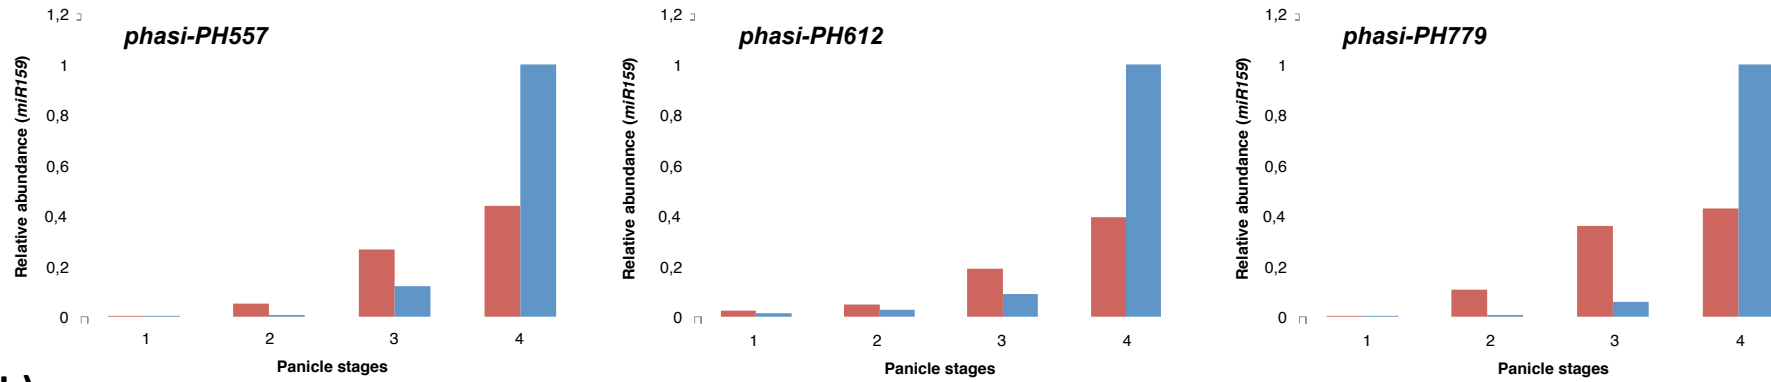

(b)

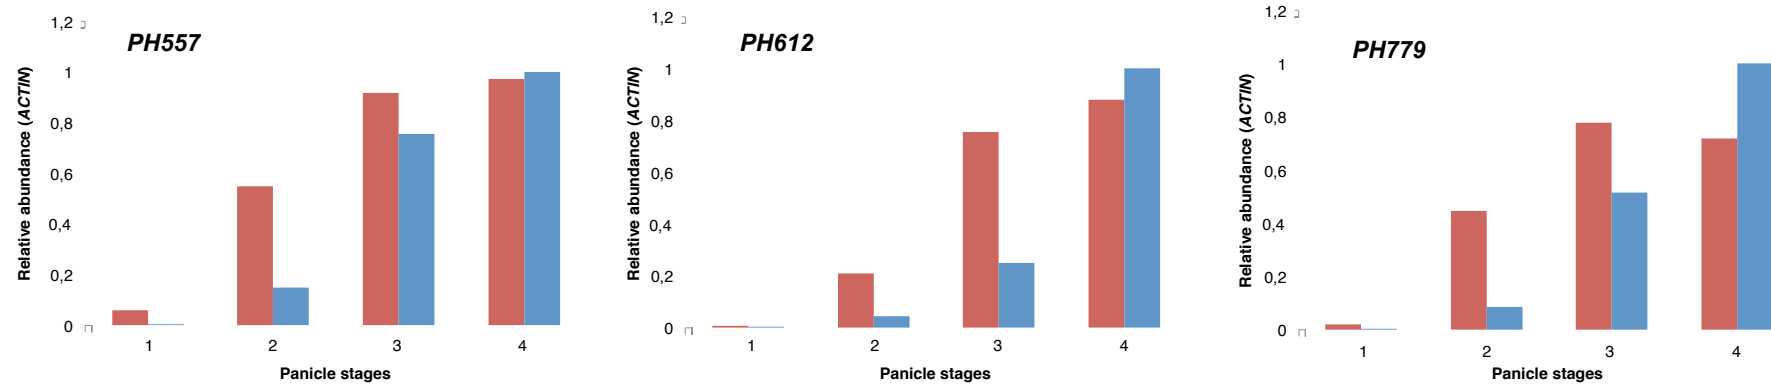

Additional file 12. Expression patterns of phasiRNAs and lncRNA precursors associated with 21-nucleotide phased loci in *O. glaberrima* and *O. barthii*.
